# Supplementary material for: Genetic inhibition of CARD9 accelerates the development of experimental atherosclerosis through CD36 dependent-defective autophagy
Source: Research Square preprint supplement (doi:10.21203/rs.3.rs-1834549/v2), 2022-11-01
Supplement: Supplementary file 1 [file 48d1ebdb58f4292d1ad72726.docx]

| **Antibodies** | **Source** | **Identifier** |
| --- | --- | --- |
| phospho-AMPKa | Cell Signaling Technology | #50081 |
| AMPKa | Cell Signaling Technology | #5831 |
| phospho-ACC1 | Cell Signaling Technology | #3661 |
| ACC1 | Cell Signaling Technology | #3676 |
| phospho-LKB1 | Cell Signaling Technology | #3482 |
| LKB1 | Cell Signaling Technology | #3047 |
| phospho-Beclin-1 | Cell Signaling Technology | #35955 |
| Beclin-1 | Cell Signaling Technology | #3495 |
| p62 | Cell Signaling Technology | #23214 |
| CHOP | Cell Signaling Technology | #5554 |
| phospho-S6 Ribosomal Protein | Cell Signaling Technology | #4858 |
| S6 Ribosomal Protein | Cell Signaling Technology | #2217 |
| LC3b | Cell Signaling Technology | 2775 |
| CD36 | Abcam | ab23680 |
| CHC17 | Novusbio | NB120-11331 |
| β-actin | Sigma | A5441 |
| HRP-coupled donkey anti-rabbit | Jackson ImmunoResearch | 711-035-152 |
| HRP-coupled donkey anti-mouse | Jackson ImmunoResearch | 711-035-151 |
| CARD9 | Abcam |  |
| CD68 | Dako Agilent |  |
| aSMA | Dako Agilent |  |
| AF488-coupled anti-mouse | Fisher Scientific |  |
| AF594-coupled anti-rabbit | Fisher Scientific |  |
| FITC/ef450- coupled anti-CD11b | BD Biosciences | M1/70 |
| PE- coupled anti-CD115 | eBioscience | AFS 98 |
| PerCP-Cy5.5- coupled anti-Gr1 | eBioscience | RB6-8C5 |
| V-500- coupled anti-B220 | BD Biosciences | RA3-6B2 |
| PE-Cy7 coupled anti-CD4 | eBioscience | RM4-5 |
| AF-700- coupled anti-CD8a | BD Biosciences | 53-6.7 |
| APC/PE-Cy7- coupled anti-NK1.1 | eBioscience | PK136 |
| PerCP- coupled anti-CD45 | BD Biosciences | 30-F11 |
| FITC/ef450- coupled anti-F4/80 | eBioscience | BM8 |
| APC/PerCP- coupled anti-CD3ε | eBioscience | 145-2C11 |
| FITC- coupled anti-MHC II | eBioscience | M5/114.15.2 |
| Percp-eFluor710- coupled anti-IgM | eBioscience | 11/41 |
| PE-Cy7- coupled anti-CD11c | BD Biosciences | HL3 |
| PE-coupled anti-CD36 | eBioscience | HM36 |
|  |  |  |
|  |  |  |

**Supplementary Table 1. List of antibodies**
