# Supplementary material for: Genetic inhibition of CARD9 accelerates the development of experimental atherosclerosis through CD36 dependent-defective autophagy
Source: Research Square preprint supplement (doi:10.21203/rs.3.rs-1834549/v2), 2022-11-01
Supplement: Supplementary file 2 [file 8c7cb713952dd86f5ce1ddb3.xlsx]

## Sheet: log2_RLE_Counts
	T400	T401	T402	T403	T404	T406	T407
	mutation	mutation	mutation	control	control	control	control
ENSG00000227232	7.88327437030989	8.83682367448704	7.95132703061647	8.24136074161404	8.35562605394496	7.99059134078868	7.67859263163773
ENSG00000238009	3.28346946000656	0	1.80321559338192	3.56202644573208	3.63034018261103	3.06849264354608	1.84905688366074
ENSG00000237683	10.0963289166953	7.2194218400429	8.97720666570283	9.29467230162239	9.98804421000397	9.54755186161313	10.0324090111808
ENSG00000239906	4.20741605952151	1.59824879552092	2.58013212780751	4.35468608856605	4.38688123547116	2.3846756967756	3.39821835481663
ENSG00000241860	9.03676927649969	8.67447086439774	8.04950588638739	8.13995558459747	8.82266724603512	8.81254849838198	8.85071297589166
ENSG00000228463	2.06249186112524	3.47751911661863	3.99456469172968	3.27031744045796	3.71093363876742	4.32194201456219	5.88571491467436
ENSG00000237094	5.82269834678899	7.33264258999079	4.69486477337447	2.90427965831286	2.88814603455711	5.72035364995096	5.1925687930254
ENSG00000225630	4.26814701610236	3.92545733628	3.45416131789444	1.66090413924776	2.18818721642471	3.65663697628436	2.41622991878119
ENSG00000237973	9.25126748083626	15.097742102786	8.6595518363286	13.1420835671483	13.0254764103123	13.5366733512516	13.4832835713167
ENSG00000248527	3.02651875438447	4.66294991359728	2.36455950793486	1.0573276937661	1.27675269354415	2.3846756967756	2.16033764350512
ENSG00000198744	6.1149299711274	8.5236551741023	6.05678446539218	4.86333897989	5.13546586614065	6.18544054593997	6.2238402311305
ENSG00000224956	5.40265159356891	7.03095800415742	4.59930241668139	4.80873663814149	4.84534622437235	4.71883234332833	5.70557352098211
ENSG00000235373	4.99893777460154	4.66294991359728	4.13748839636131	4.10568625799139	4.94867227456321	5.20512868499163	5.12244070691391
ENSG00000228327	7.82382628869435	7.33264258999079	6.65247061566712	7.03043298600894	7.19820259511402	7.25740239921213	6.98634898162409
ENSG00000237491	5.80230915779048	4.77403976778885	4.26752059213666	6.24020076090736	6.47932203211707	7.12183582647584	6.73932070837895
ENSG00000230092	4.07770084731778	1.59824879552092	5.35189531514298	4.56696956045767	3.99464891084152	5.46852523391801	5.75276111173854
ENSG00000269831	3.39659994465825	3.71880372171819	3.99456469172968	3.68838235732035	2.88814603455711	4.07326276388756	4.32812344090413
ENSG00000240453	4.76610961001424	2.3378570285089	4.20396899742703	3.27031744045796	3.63034018261103	5.53572172234859	4.50390308473326
ENSG00000177757	3.16070707689657	0	1.41141623664498	2.41258988407027	1.64818696484463	3.06849264354608	3.89537809682773
ENSG00000225880	7.06223763325516	7.51962061886877	6.86255947062133	6.90590500865963	7.23273408346796	7.75007017783034	7.08183003201355
ENSG00000228794	8.099232887793	8.19474118843267	7.96097059418994	6.11077268077387	6.12953242575901	8.32094048176358	7.5103105730562
ENSG00000188976	10.4093828335879	10.5561177554837	9.83865216936413	9.66882654349085	9.85693496618823	9.97578301096912	9.87869889419158
ENSG00000187961	8.47588639466293	8.27248452308512	8.24767422264491	7.64326069607717	7.71052569896676	7.67753848325451	8.58015079241786
ENSG00000187583	5.84280339236809	7.25815779343705	6.69931364132866	4.42897248668723	4.91504584779566	6.55289702595374	6.00744337156111
ENSG00000272512	7.49589134094116	5.634190616605	5.66674086892645	6.24020076090736	5.99115713372447	3.53052810100398	7.70881956765435
ENSG00000188290	9.75550385173636	10.1452796291736	7.44681923033241	7.08888517601646	7.01193942700484	5.66139660513946	8.3654517012798
ENSG00000187608	9.16407009578784	8.09127278792328	7.43993957116394	6.71126120329988	6.5685395211044	7.00813186587994	6.32097068594381
ENSG00000188157	9.37031880891472	10.6700257630308	9.35176247011225	6.72606959547112	6.97161678325154	8.80915748965845	8.70236597502609
ENSG00000217801	6.74727859488482	9.82882599756366	9.4729793712168	1.66090413924776	1.9433062058776	6.3438170663991	7.34308842004535
ENSG00000131591	8.39309459461749	8.1439343685303	8.01288785664205	7.95119543270257	8.31752496408338	7.56140860429779	7.5103105730562
ENSG00000186891	4.43635943476301	7.03095800415742	6.43444557919992	1.66090413924776	2.39747163545167	5.46852523391801	3.89537809682773
ENSG00000186827	6.01215366690413	6.91453564667503	6.09231850757322	3.68838235732035	4.28526085098457	6.30582289659911	5.90672969071449
ENSG00000078808	11.1731414859549	11.8041040992782	11.6127419081502	10.3826718963936	10.2848086424439	11.3288765362764	10.11824327032
ENSG00000176022	8.27598575883766	6.32341459670417	6.24220556828899	7.80542837209251	7.69078985555879	7.28695729539941	5.04872881135868
ENSG00000184163	6.62490437107333	7.35067805578218	5.88507045799159	4.56696956045767	5.47246708580862	6.20621484166961	7.76168163452438
ENSG00000260179	5.99428924190152	7.79458072361512	6.03868375659619	4.27636593605377	5.07584872236753	5.77699565808605	6.86274856741382
ENSG00000160087	10.0462731739845	10.7520396541009	10.2151893278822	9.5089084271875	9.67050742218273	10.0277670831145	10.6770120040863
ENSG00000230415	4.00819014552515	4.2667716376633	2.7676411147326	3.80455730830565	3.92877767610173	3.06849264354608	1.84905688366074
ENSG00000162572	6.68181874806234	5.74743165100522	5.73577719027462	6.08802573911961	6.37188067946337	5.69117627324744	5.92744274820844
ENSG00000131584	11.313472647294	11.6099966066221	10.2071081407578	10.6290752737113	11.1761560842481	10.6005470663385	10.8805903939893
ENSG00000169972	7.74589655245549	6.73394127233344	5.66674086892645	7.40639563862992	7.55000657435783	7.13272847022075	6.9764439062332
ENSG00000127054	10.7353060705376	10.3608313764933	9.59721717111091	10.1137668147393	10.4509433001654	10.2677767001271	10.871934141868
ENSG00000240731	5.97620083107363	5.634190616605	4.49695825262468	5.46737492781417	5.83808782983519	5.07564192260167	6.4265963380142
ENSG00000224051	7.98628116317078	7.00841302452502	6.22630002487491	7.95119543270257	7.85938641822858	7.13272847022075	7.5103105730562
ENSG00000169962	4.72337138775065	2.3378570285089	3.21721640213654	4.91594990284807	4.77210756444987	3.65663697628436	5.44327126829131
ENSG00000107404	9.52918625329344	10.31793072041	9.41977566281135	8.97641813124497	9.11324282505483	8.88197827569119	9.06683596869459
ENSG00000175756	8.97206949391546	9.39706467247955	8.58978493481013	8.1835242821088	8.14333285036187	9.06655234488944	8.22192148133479
ENSG00000221978	11.3411210765478	11.7465219323466	11.4386147028025	11.1110017265687	11.3973817061029	11.6885563810874	11.7124455985598
ENSG00000224870	6.28621554841451	6.08567826021284	5.64297459524697	6.94440482374562	6.76063627385602	5.83149758792892	6.56522022739225
ENSG00000242485	9.08820319300125	8.16447229999671	8.5359591712603	8.60401670840495	8.91274063561559	8.95129933765212	9.43010465695339
ENSG00000272455	3.9351600549912	6.93858386384527	3.99456469172968	4.56696956045767	4.57088056931403	5.63098925509111	5.44327126829131
ENSG00000160072	9.61935971638708	9.78969906104153	8.40431665497105	8.53841438545502	8.65964147028087	9.13586639370727	8.96532392373227
ENSG00000197785	7.80857346810952	7.33264258999079	5.75807419187533	7.16693290735945	7.15564329445281	6.07683003226659	6.0832398901871
ENSG00000160075	9.82157766680555	10.1885387990582	9.46283385212549	9.4229065676537	9.32008766857539	9.60539125990323	9.14408251374941
ENSG00000215014	5.95788274631673	5.69192192306556	5.56923232898555	6.39647864772677	6.08486593539482	6.41692926732276	5.01041068592179
ENSG00000228594	7.57012709886185	6.61959308374914	6.64051829146638	6.91885277295681	6.51342839449543	7.00813186587994	5.52708691895972
ENSG00000272106	7.43096985959331	7.79458072361512	7.34738396931438	7.05409880207049	7.01987045862909	7.43510601408695	6.32097068594381
ENSG00000197530	9.74886012342058	9.94021631387186	8.9239650760889	9.43196697361875	9.4852935074168	8.7851945978474	8.86420496450533
ENSG00000248333	9.97291463295363	10.4450853792495	9.77310669833022	8.84352861602268	8.94642021255235	10.4043875028454	10.2453542559859
ENSG00000272004	2.87855725524597	0	3.83590915873503	3.56202644573208	3.02052882301288	2.87448177217153	2.82228974443749
ENSG00000189339	9.77917109221689	8.73751335406451	8.27112017999558	10.2772768571121	10.2303103995937	9.49575864390734	9.76677949632933
ENSG00000008128	6.85018154000097	7.45439791385798	6.71079054813194	6.8118632093904	6.91320197281668	7.88503300543308	8.02456928202777
ENSG00000268575	7.23191584564647	6.42904243238721	7.04590752229749	7.55478574433471	7.6504892719807	7.58539446281413	8.29148161428795
ENSG00000227775	3.39659994465825	0	3.08234782447163	2.90427965831286	3.25362320518174	1.03953588835187	3.13880429617032
ENSG00000215790	6.72578697802033	5.57405246995406	5.69012196495273	6.4330392337477	6.95516678304607	6.80522097674631	7.00595742256459
ENSG00000008130	12.218506653204	10.1708830085626	10.0017017897472	12.265992462023	12.3561971721074	10.8981541210026	11.0148824763051
ENSG00000078369	12.6387487274221	12.9804263735959	13.1981619276964	12.548895951154	12.3358908096587	12.588768318918	12.0420993057524
ENSG00000231050	3.16070707689657	0	2.7676411147326	3.42353226338762	3.99464891084152	2.65026627927602	3.97712668115064
ENSG00000067606	6.28621554841451	5.69192192306556	4.49695825262468	6.01755043937289	6.11479671797727	3.97983584168637	4.44765640149965
ENSG00000271806	5.26042433317434	2.82441493502978	3.45416131789444	2.90427965831286	3.25362320518174	2.3846756967756	2.41622991878119
ENSG00000182873	4.32642440952544	5.228803390048	3.83590915873503	4.0121238580642	3.54497674419106	4.24371680643672	5.55397722515395
ENSG00000162585	9.64534818625622	10.738404994269	9.05130170838473	8.51728645403996	8.68480222441816	9.68894484170255	9.61224436994813
ENSG00000269554	4.84796565750879	5.80088446224794	3.559477134893	3.68838235732035	4.11800203082925	4.3961429931308	4.32812344090413
ENSG00000157933	11.4831845669776	13.8017543790395	11.781765769888	10.693594136284	10.6865367813012	12.8945903445618	12.4307693061996
ENSG00000116151	6.16369681392023	5.228803390048	3.65762523742616	5.94345483044396	6.29553353202915	4.8826572049622	4.84606987040974
ENSG00000157916	9.57647900983307	8.99425916774173	8.5615392667284	9.86388271817889	9.97586440438104	9.33292143218948	9.843711424219
ENSG00000157911	7.51481145667736	7.93269123210935	7.31014238032911	7.16693290735945	6.80720724279093	7.45259902187933	6.70374151089645
ENSG00000149527	5.13559722390137	4.66294991359728	2.93355869889295	5.46737492781417	5.01366140218408	3.65663697628436	3.51230070833696
ENSG00000157881	9.28288399652118	8.23413646736413	8.3829538090398	9.36021373223245	9.56875734092755	8.84271415779402	8.73504431663515
ENSG00000272449	7.31342101064221	7.27714260647176	6.60405544985893	6.65045916074506	6.81634371619152	6.22669423637243	6.38227163667504
ENSG00000238164	6.46547609435341	5.99685027579024	6.46187280769927	6.8118632093904	6.75113892339321	5.28541649545005	4.61021658379842
ENSG00000157873	12.5138263252386	12.6987010056601	12.0229724197119	11.7179089738257	12.0030716011335	12.3095225827702	11.9162757326643
ENSG00000225931	5.37530578225617	3.47751911661863	6.09231850757322	5.86534672500643	6.05430101640249	6.07683003226659	5.55397722515395
ENSG00000228037	2.71366837669273	0	1.41141623664498	2.67928097903747	2.39747163545167	3.23947903556953	3.71651699463577
ENSG00000157870	7.7775753530738	7.33264258999079	5.88507045799159	6.72606959547112	6.91320197281668	7.12183582647584	7.73842617228816
ENSG00000142606	4.88721545208304	0	3.559477134893	4.86333897989	4.61343406309207	4.24371680643672	3.71651699463577
ENSG00000215912	4.43635943476301	3.92545733628	2.93355869889295	5.27938070099007	6.03877224593677	4.3961429931308	4.1977846616995
ENSG00000162591	8.55722899347685	7.90854376175175	6.14403055772711	8.04866044763894	8.73865814179126	7.94805729522635	7.20570258189479
ENSG00000158109	8.11585115721605	6.46260033370346	7.65125104383015	8.99487798776942	8.58141411064901	8.27251479679078	8.03415047105424
ENSG00000116213	8.58733270197696	8.11256864195348	8.07637208925114	9.12068270224317	9.30068774289174	8.73604065162467	8.32309037101374
ENSG00000078900	2.87855725524597	3.18761300887002	0.871836374156443	4.42897248668723	4.48181229406492	1.63743986325387	0.901145829698065
ENSG00000227372	8.13635836877449	8.19474118843267	7.09927928262448	7.85342550372041	8.37120924435852	8.18102878190351	7.33535909869271
ENSG00000235169	3.16070707689657	3.47751911661863	1.80321559338192	2.085159318413	2.39747163545167	2.05890482480417	3.27433421141826
ENSG00000130764	9.8404488801746	9.94319098585225	9.66072866798069	9.55317766447733	9.48386070653626	9.85765011729923	9.69611376369838
ENSG00000116198	9.31021690001328	7.36849083699411	6.39230157503434	9.22861318460005	9.34239605071953	7.78501287644038	7.84569605853513
ENSG00000169598	7.09613331514935	6.20943785841715	4.94858532820136	7.04231441993695	7.19119599489088	6.72111370210923	4.8889431722982
ENSG00000198912	8.64285490562646	8.30983959248322	7.99422430408895	8.70089776680951	8.96707754679395	9.14933835785704	8.54372156878959
ENSG00000236423	3.50150062063204	0	1.41141623664498	4.10568625799139	4.28526085098457	2.3846756967756	1.84905688366074
ENSG00000131697	8.83576548012257	8.05872773980707	7.15914902304862	8.38357702603376	9.01548076200796	8.24767844301896	8.25507379954282
ENSG00000069424	12.8032880904643	12.9872877764505	13.1707649975783	12.503956163999	12.642874639045	13.3195456562281	13.3282431976747
ENSG00000116254	6.24148140536947	5.51129803534179	2.7676411147326	5.31899045793984	5.92512256732836	3.23947903556953	2.82228974443749
ENSG00000116251	11.2490201255004	12.3799041009553	11.4023565455654	10.877273587612	10.7834789790479	11.6839352388688	10.7427650339223
ENSG00000158286	8.3828325654604	5.80088446224794	5.69012196495273	7.52121854776533	7.85938641822858	6.9600164666652	6.94631399399563
ENSG00000116237	8.38626135877862	6.28641389541695	6.25793766544168	8.73789909006877	8.42595486603071	6.91024083863757	5.1925687930254
ENSG00000158292	7.4637957539417	6.67789978807748	6.91311286221732	6.13316653185896	6.24229423746412	6.45214130295204	4.38912753927669
ENSG00000097021	6.67061407843391	6.32341459670417	7.39084087055697	5.19674137596824	5.27454657842892	6.48651435071347	5.38456055948192
ENSG00000271746	2.31363461767247	6.12812207138205	3.99456469172968	4.27636593605377	3.45424297564438	3.06849264354608	2.41622991878119
ENSG00000215788	5.48171013170767	6.32341459670417	4.59930241668139	5.10907919827554	4.33696559891426	4.65981180628129	3.27433421141826
ENSG00000162408	9.59881775198523	9.97260515806364	10.067902291451	9.40461324460885	9.36592118882764	10.2007770452005	11.0589621659702
ENSG00000204859	9.01478522887678	9.06697041967139	9.01009244589913	9.40920836741812	9.50802688549402	8.75025635405558	8.87224000550021
ENSG00000162413	10.0858232408254	11.1715259875505	10.8233989807833	10.7390173956027	10.8202755374756	11.7137114172932	11.402417484271
ENSG00000116273	7.52106342157146	7.95644117274656	9.36271686000682	7.01845288843759	7.09687124647712	9.2553055301663	9.31887776817747
ENSG00000041988	5.69580302854551	6.96223778589868	6.98103755939268	6.91885277295681	6.91320197281668	7.58539446281413	7.69680468261766
ENSG00000007923	8.6990790564958	7.23891981900778	7.91705769055423	8.90338281905436	9.09646506490662	8.10563215373518	7.07256131870188
ENSG00000237436	4.43635943476301	6.32341459670417	4.78448852620561	5.72496432297004	5.22051235652374	4.32194201456219	3.80871760677765
ENSG00000171735	7.91210433942627	7.09655315008832	8.54880591260375	7.93216433341612	7.89431962141854	8.68515273361366	9.21108079819898
ENSG00000049245	11.1666759137422	11.4900273123775	11.4596000093074	11.0853901357511	10.7664914662423	11.0829028860813	10.2769700277868
ENSG00000269925	6.41265276873352	6.46260033370346	6.24220556828899	6.17693765232884	5.90813060733689	6.20621484166961	5.96799751523785
ENSG00000049246	7.32775782800323	5.90219214593163	6.10976262264049	6.87965557037017	6.85232176816343	6.97219659144678	7.93534878331771
ENSG00000049249	4.58699099674475	4.66294991359728	4.13748839636131	5.83834182127342	5.80174852339161	4.65981180628129	4.38912753927669
ENSG00000116288	9.06912971165201	9.44821534919881	8.66546204844455	9.19441358836548	9.03126089299835	8.74316601220388	7.69075950770718
ENSG00000116285	4.80761810241189	7.85900138994838	6.43444557919992	4.63131443218978	3.92877767610173	6.16436273185934	5.75276111173854
ENSG00000162426	4.43635943476301	3.47751911661863	2.7676411147326	4.35468608856605	4.57088056931403	3.77260308406909	2.63349908374298
ENSG00000142599	11.3901888101072	10.6281260092127	11.1983676170109	11.121540471238	11.3339846387385	11.3270994148559	11.1343948834668
ENSG00000232912	2.71366837669273	0	2.7676411147326	3.91207030110164	4.48181229406492	3.39233067961497	2.16033764350512
ENSG00000224315	3.39659994465825	3.47751911661863	2.11101898638035	2.41258988407027	3.45424297564438	2.05890482480417	2.98920973011426
ENSG00000228423	2.31363461767247	4.2667716376633	1.80321559338192	3.42353226338762	3.85975436971083	2.65026627927602	3.27433421141826
ENSG00000074800	12.7470588673872	13.2209335550997	14.0086874406065	12.9288328864993	12.5885836655537	13.0665149983786	12.2588353517705
ENSG00000236269	7.83390597739174	8.86846394149214	7.6748824729379	7.67413404196743	7.6504892719807	8.28721393548031	8.47151204310373
ENSG00000230679	1.75821945050536	2.3378570285089	2.36455950793486	3.27031744045796	1.64818696484463	2.3846756967756	1.45159216230282
ENSG00000142583	4.962649881597	6.20943785841715	4.64787469213644	2.90427965831286	3.99464891084152	6.50339856489864	5.52708691895972
ENSG00000180758	6.99195934666524	8.00279935725202	5.49151677961848	6.55416354686084	6.54674704387731	7.64747300566213	6.9764439062332
ENSG00000049239	11.6450701889425	11.0567348853718	10.1877319308384	11.2526069437716	11.0879002836039	11.4729874775478	9.70363837794009
ENSG00000171621	6.01215366690413	10.4111127231725	9.48639669122896	4.63131443218978	4.48181229406492	5.83149758792892	7.16267308640279
ENSG00000171612	8.79764775113713	8.76467164323048	8.21177499166769	7.82619440163808	8.03009424958054	8.84271415779402	7.61616981422411
ENSG00000231181	5.5071286878103	2.3378570285089	3.91741677817488	5.0157438459489	5.01366140218408	6.03098803180369	4.55803890497379
ENSG00000188807	8.02198673886289	8.11256864195348	6.62846611780776	7.14506104684761	7.44788870766175	8.15988593783245	9.45884624604509
ENSG00000171608	12.4039428566152	11.7950769326067	11.6138885104787	12.2583724503757	12.2402697081971	12.0836232441993	12.9498588361069
ENSG00000179840	4.32642440952544	3.71880372171819	2.58013212780751	3.68838235732035	3.7872620982143	2.05890482480417	2.41622991878119
ENSG00000171603	10.4720375917959	10.1270830098855	10.5554933990584	10.4309222610936	10.4183119097551	10.5946502729388	10.2224893680855
ENSG00000178585	9.02581912689417	9.31217397513362	8.85840022126237	8.68960975187476	8.70953168342989	9.40207922679077	9.50952428485412
ENSG00000162441	8.23473727437288	7.29588083459809	7.53984076802427	8.26690261449178	7.87258569254784	7.73585263171011	6.55194208904851
ENSG00000173614	6.27145775311893	5.57405246995406	4.94858532820136	7.17774573644798	7.35689629984119	4.83008913572637	5.44327126829131
ENSG00000202415	2.06249186112524	2.82441493502978	2.36455950793486	2.67928097903747	3.45424297564438	2.05890482480417	2.82228974443749
ENSG00000162444	8.3828325654604	8.33723454602895	7.56535273642625	8.43405413185157	8.2313496198713	8.30658268190659	7.38112581201178
ENSG00000130939	10.4377494409479	10.163249591521	10.2071081407578	10.570793893141	10.748705117635	10.4355112826834	10.9935553422387
ENSG00000233623	2.71366837669273	0	3.34054781363769	4.27636593605377	4.98153275333896	5.56818160163491	5.94786262848562
ENSG00000054523	11.3760309956081	11.4180857826685	11.7629389821412	11.4858323562487	11.5904830685169	11.9061327613113	12.5669501490274
ENSG00000264881	3.16070707689657	0	2.58013212780751	2.67928097903747	2.39747163545167	2.87448177217153	3.27433421141826
ENSG00000199562	3.50150062063204	0	4.20396899742703	2.67928097903747	2.88814603455711	3.39233067961497	4.38912753927669
ENSG00000265945	4.38243881584995	6.64904097498125	4.38679567446152	3.42353226338762	3.45424297564438	5.36147075495439	5.41421454850831
ENSG00000142657	11.9618183093923	12.2417688654042	12.8158435422986	12.4084985019619	12.0580249211751	12.3389212241098	11.5297908251349
ENSG00000160049	8.39309459461749	7.71327539387474	7.27191390906593	8.67823271967295	8.66975848931508	7.83921837639906	8.27944747540396
ENSG00000142655	8.099232887793	7.48737781610064	7.88195447930643	7.9448795859157	8.05732265055152	8.06071052909593	8.70536750948541
ENSG00000243267	2.31363461767247	0	2.36455950793486	2.90427965831286	3.35741753305583	0	4.1279158850238
ENSG00000130940	8.22327994938845	8.99998431106207	9.06701493256692	7.08888517601646	7.05888451080569	8.93583447513137	8.98521824423214
ENSG00000175262	4.88721545208304	4.2667716376633	2.93355869889295	5.56943478105997	5.76447018094422	4.46671360872394	4.50390308473326
ENSG00000120948	10.4043185460649	10.2924976587068	10.3469851711465	10.9610284443232	11.0296824487687	10.7191182059995	11.5797138522472
ENSG00000271895	5.939329080064	6.46260033370346	6.55395894025316	6.26068665573752	6.84341101975361	6.92284667100312	8.01007712472751
ENSG00000116649	7.98175518546093	8.31902916453228	7.57166085559686	7.86015371922795	7.76816325956674	7.84585307452325	6.36718885713095
ENSG00000171824	9.88475743565121	9.86691974242476	9.7648721530954	9.90513249127006	10.1017005667975	10.4144649872487	9.44094996425014
ENSG00000198793	10.7770444475212	10.2594660332554	10.8689299585364	10.9881559482493	11.2589039406432	11.0878089503415	10.6639569123142
ENSG00000120942	7.93100914596845	6.58953156334761	8.14142702755638	8.04866044763894	7.786875183043	8.13301406326651	6.62983740905656
ENSG00000132879	7.40416054773136	7.25815779343705	6.09231850757322	6.68118046928943	7.03560290874421	6.7496977532876	7.6288723225532
ENSG00000116663	7.62919949640188	6.64904097498125	7.480733868295	7.66647742328449	7.40007449324635	7.19641176518763	6.65489512191928
ENSG00000116670	8.55722899347685	9.46900423190691	8.96287999879692	7.3114003322688	7.64023573497127	9.20973874385758	8.60607868563493
ENSG00000162490	3.59928809165048	3.71880372171819	3.559477134893	4.96670956938878	4.33696559891426	2.3846756967756	2.16033764350512
ENSG00000177674	10.9739068558996	10.9950054847292	10.0900434517884	10.9133034304371	10.8349601261863	10.0961441057552	9.37838648653218
ENSG00000177000	12.1427366106419	12.2968765981564	12.0480723059647	11.0832351705854	11.3264101750342	12.4380267372962	13.5733147626919
ENSG00000011021	10.434440997292	10.4492762591231	10.4455886092857	10.2442247069884	10.6235215772355	10.3163590336999	11.6338866915557
ENSG00000242349	6.692937067001	4.2667716376633	5.61881024029456	5.46737492781417	6.33421208139282	5.39804537877541	6.75098808982511
ENSG00000199347	6.91808148513836	7.95644117274656	8.97244690044937	9.38141549393161	8.18977107043462	6.91024083863757	8.04366844929875
ENSG00000201801	6.76845474794837	7.23891981900778	8.24767422264491	8.26690261449178	7.53348102750838	6.22669423637243	7.72665633902984
ENSG00000116685	10.4566271477255	10.0819115025824	9.32773870578355	10.0534017164332	9.87563003069445	10.4573385143163	8.92726610467452
ENSG00000083444	9.76738600371542	9.07783851047203	9.42675191727742	10.2090805230272	10.0857320939464	9.07786882619427	8.23028125479202
ENSG00000116688	11.1561699284904	11.5291572314467	11.5798702688273	11.0416671020421	10.9710629770732	11.5450863716631	10.9650371734108
ENSG00000116691	10.3447644525379	10.232971420914	9.00776816022098	9.51957259243445	9.6463752706221	9.05800634755467	8.78413478160383
ENSG00000120949	8.63134227334553	6.67789978807748	6.43444557919992	8.86375718860958	8.69226567216582	6.9600164666652	5.38456055948192
ENSG00000028137	14.2636111632937	14.4763015498977	14.5839505091377	14.2750856306332	14.1106009336978	14.4491776298612	13.8360042418197
ENSG00000263676	4.92542564221765	6.5274614568234	4.32839041862219	2.085159318413	3.71093363876742	5.28541649545005	4.93057907059869
ENSG00000048707	11.8796646509025	11.5575809434287	12.3603427535325	12.1131420452463	12.4376430948117	12.208249007529	13.0029692996387
ENSG00000239149	2.71366837669273	0	3.08234782447163	2.67928097903747	3.85975436971083	2.3846756967756	3.71651699463577
ENSG00000162496	6.47838516113805	12.2210846515376	11.4634214898654	5.83834182127342	5.24778242517152	11.7027885714352	10.5382964710936
ENSG00000272482	2.06249186112524	6.58953156334761	6.55395894025316	2.085159318413	1.27675269354415	6.80522097674631	6.8190777080575
ENSG00000116731	11.5281091470906	11.767651496108	12.2333040473797	11.2917046268781	11.3992830386881	12.5956736012713	11.9624826036655
ENSG00000175147	2.71366837669273	5.44568927656727	4.49695825262468	1.0573276937661	2.18818721642471	3.39233067961497	2.16033764350512
ENSG00000171729	6.08147817304481	9.05601983568627	8.76515404667231	5.46737492781417	5.300823246423	7.83255302545605	5.60629937335222
ENSG00000142621	4.14401582757003	6.28641389541695	5.35189531514298	1.0573276937661	2.88814603455711	4.24371680643672	5.90672969071449
ENSG00000228140	5.5071286878103	7.62711287906224	6.33412333895094	5.81082177166205	5.40139046846077	5.20512868499163	6.52501346682731
ENSG00000142634	13.7110888342473	14.7306357342753	13.7310971826385	12.9696530679905	12.7980774403776	13.4795563544624	13.3860891991173
ENSG00000162438	5.06888502984787	6.55883029519823	4.64787469213644	4.80873663814149	4.88061691203016	5.12010807646623	8.41762732441584
ENSG00000132906	9.64104915517254	10.9063321016399	9.64436305331941	8.48282468235134	8.42296733450466	10.2327686532052	10.7302941137907
ENSG00000116138	8.43010959653759	7.72714848141846	7.97055012403203	9.18907940463803	9.15345199941688	8.10563215373518	9.18551375214252
ENSG00000197312	9.2568974513429	9.13098379793103	9.70730859793603	10.2364885397432	10.3795418692741	10.033590589225	11.244759861108
ENSG00000271742	2.31363461767247	4.10618459694941	4.13748839636131	3.0988763445592	3.02052882301288	3.23947903556953	3.80871760677765
ENSG00000116786	11.968696133202	13.6667784677989	13.3382899793569	10.8454159302394	10.9715742256002	12.9063415831376	11.731710702731
ENSG00000162461	7.94966942820146	8.84320748459898	8.92149768517312	6.13316653185896	6.83444489223746	8.51242588042991	7.65394665843085
ENSG00000233954	2.31363461767247	6.28641389541695	4.78448852620561	2.90427965831286	3.71093363876742	4.8826572049622	3.61801924029512
ENSG00000179743	7.2989402895641	7.94461507392324	7.88702182049122	7.0063724748829	7.23273408346796	7.75007017783034	6.38227163667504
ENSG00000065526	12.2888930154395	13.0041218259721	13.6400480986157	12.1127899472712	12.3768007719058	12.9837703174263	13.0131487967299
ENSG00000116809	10.6045261715158	12.2633513037107	11.0447332535536	9.17565701612622	9.30231440448248	11.2953371728589	10.3401284313246
ENSG00000142627	4.5385071835112	7.47098210269405	5.16428799167219	0	0	4.46671360872394	4.55803890497379
ENSG00000142632	5.82269834678899	0	2.93355869889295	6.15521808676479	6.17285744986775	5.36147075495439	7.71478969445307
ENSG00000237276	5.23021542769131	5.37695411708694	4.13748839636131	3.56202644573208	4.17593646214101	4.98237402963518	8.87224000550021
ENSG00000204377	4.14401582757003	4.2667716376633	4.59930241668139	3.27031744045796	2.74237703473556	5.1632445922549	7.23091742543661
ENSG00000132881	6.21086896839416	6.55883029519823	5.38092154114533	4.91594990284807	5.22051235652374	6.81877420782221	8.63154882138945
ENSG00000233929	4.20741605952151	3.71880372171819	4.69486477337447	3.80455730830565	4.28526085098457	4.53399259181824	6.8946555061959
ENSG00000037637	10.2453709555432	10.1504367845795	10.7529833797179	10.297246568882	10.3483877604383	10.434411204132	11.9349364440821
ENSG00000055070	11.6371772952245	12.2992002532054	12.3723620599039	10.7048511405268	10.558989144632	11.9398590997957	10.9088581341223
ENSG00000157191	10.6643539765029	8.50766886377107	9.17453522115728	10.6602504091949	10.4362022814526	9.64777284126349	10.1767246305881
ENSG00000226029	7.95890983360617	6.49539537033575	7.29497233114104	7.5956754017161	7.81904818474126	7.84585307452325	9.34605701232862
ENSG00000080947	6.61324701568946	3.47751911661863	4.06779570150376	7.30154750261753	7.45375558226351	5.74895261565936	4.80188335580512
ENSG00000206652	9.53691975392387	10.7401163903814	9.77857039900866	11.7220700302013	10.9227070250584	9.0026733935875	9.91674780023603
ENSG00000261135	1.75821945050536	3.71880372171819	0.871836374156443	2.90427965831286	2.88814603455711	1.03953588835187	3.13880429617032
ENSG00000219481	8.96978587738759	7.83357725993835	7.41208810016386	9.45437212983653	9.72852391848075	7.74297891867597	8.187989387635
ENSG00000215908	8.55418378375542	8.84956317126035	7.53984076802427	9.76517474402194	10.1860606133552	9.74148162156965	7.66632227367305
ENSG00000186301	3.69086607913953	0	0	3.68838235732035	4.28526085098457	3.23947903556953	3.13880429617032
ENSG00000207513	2.87855725524597	4.97344299326954	3.65762523742616	5.83834182127342	4.73404509862801	2.65026627927602	2.98920973011426
ENSG00000058453	9.36337657893264	10.0324892599418	7.42608104428817	8.61201115991428	9.05461210534679	8.71445095512736	8.73210395654058
ENSG00000207389	5.62790857511648	7.7545007440516	5.86466564213961	7.89333202393376	7.26645833070927	4.65981180628129	6.33654183999291
ENSG00000238142	5.42948870135878	5.57405246995406	4.74037249381492	5.46737492781417	5.16437534212712	5.66139660513946	4.8889431722982
ENSG00000207005	7.59404708467634	8.79791598384907	8.08080154816447	9.60015351794167	8.82266724603512	6.92284667100312	8.05782870454827
ENSG00000159363	9.67087677611405	10.1113011236943	8.8686831059743	9.89533957511102	9.93345669033151	10.6468733210832	10.827167485552
ENSG00000117118	9.22469982323146	9.01702467351785	9.61565039824946	9.51957259243445	9.25438023227729	9.51461911322986	9.37838648653218
ENSG00000117115	9.30297860967545	9.97260515806364	9.96742640804595	9.8040768658646	9.69671841251385	10.0277670831145	10.4506838460133
ENSG00000159339	9.99554101063077	8.39920290202386	8.17909691733304	10.8855415589224	10.9659405025906	9.41552168098	8.3654517012798
ENSG00000179051	12.3390747876234	12.0741443342362	12.0088047229258	11.2754376327842	11.060287191746	12.9295607473182	12.0580370903766
ENSG00000074964	10.6343897784076	9.80613110123904	8.21580819404216	11.1737847413538	11.3646696703811	10.4767045994253	10.1283426608196
ENSG00000159423	6.47838516113805	5.14860253177577	5.46465259151805	5.94345483044396	6.02307450770863	6.50339856489864	7.97070420496888
ENSG00000169991	10.128418675027	10.8535537658955	9.93231685751926	8.6667652550568	8.63919207258449	10.2123759160225	10.649224746356
ENSG00000272084	5.939329080064	6.70619262950823	7.13379416662759	5.66474922567674	5.85591989942816	7.03160088335198	8.03415047105424
ENSG00000127481	13.315072703941	13.7551210704367	14.1267150498257	13.0918759762303	13.3107149910964	13.9551044917713	14.6307784751995
ENSG00000266098	4.38243881584995	0	5.19729939793444	3.91207030110164	4.17593646214101	4.46671360872394	6.0267690909775
ENSG00000230424	5.5071286878103	5.14860253177577	5.69012196495273	5.56943478105997	5.35198297114132	5.59992719236522	6.71569900228653
ENSG00000127463	9.39435687020009	8.73751335406451	9.34072426668394	9.58195338836194	9.30231440448248	9.48304660950667	8.3347673642334
ENSG00000053372	7.32060722830872	6.04194781204247	6.60405544985893	7.12285248875394	6.97977197610917	6.80522097674631	5.35428423090093
ENSG00000211454	3.9351600549912	3.47751911661863	3.99456469172968	2.90427965831286	2.18818721642471	5.24583103298425	7.40347598985852
ENSG00000162482	4.76610961001424	4.41126059962802	4.78448852620561	3.27031744045796	3.45424297564438	5.74895261565936	7.11832064392562
ENSG00000053371	8.26485262399952	7.403469877273	7.59662107828192	8.21535850570339	7.87695875066406	7.54519358163213	8.50978642853966
ENSG00000040487	8.22327994938845	9.24143788089153	8.49671796954781	7.73396669279689	7.92842691624529	8.30176481880224	8.3692417597046
ENSG00000077549	12.10967145257	12.2537989468472	12.2130182964069	11.924210137516	11.7833608898348	11.8703793679555	11.841169503357
ENSG00000235185	0.843395306370566	1.59824879552092	3.34054781363769	4.49962036183748	3.92877767610173	2.87448177217153	2.82228974443749
ENSG00000173436	7.63497585219514	7.58202177441776	7.22466109403551	7.06578770507949	7.08935349463972	7.29667589536822	7.57080904180184
ENSG00000226396	5.58080291835333	6.32341459670417	5.09590885028622	5.35754171045242	5.13546586614065	5.8840152842654	5.98785525421123
ENSG00000162542	8.22710917657937	6.98551013427799	6.57922462962528	8.14547417219503	8.20376415417556	7.31591886758568	7.98559525517527
ENSG00000169914	7.83390597739174	6.42904243238721	8.14142702755638	7.86685070233666	7.95762335422095	8.82603338632276	8.25507379954282
ENSG00000227066	2.52747258896495	6.73394127233344	2.93355869889295	1.0573276937661	1.64818696484463	5.72035364995096	4.8889431722982
ENSG00000187980	1.37213626134902	0	1.41141623664498	2.41258988407027	3.35741753305583	4.16100570988994	5.25944545529963
ENSG00000162543	5.55666047621853	8.05872773980707	4.74037249381492	4.91594990284807	4.52703367828901	6.73547651835367	6.45540721130167
ENSG00000090432	8.58435044119872	9.83524521619521	9.8709805094126	8.31176847438007	8.03009424958054	9.40207922679077	8.82885986107658
ENSG00000158825	9.6266258205469	9.30756462109444	9.15366267893115	9.35307666845505	9.02141855632015	9.06086064184736	8.38055255823332
ENSG00000158828	8.72368227411865	8.43345385527378	8.33555301652407	9.06934851199338	9.05846749070133	9.12772241379252	9.7096299394226
ENSG00000117242	7.07928501800694	7.55115855143806	7.98006646491069	7.05409880207049	7.05888451080569	7.76414897834313	7.80709730254047
ENSG00000244038	10.2899864996649	10.6519578073264	11.0683457663065	10.5323453808927	10.2938311264359	10.821124248968	9.81898249936095
ENSG00000189410	3.50150062063204	4.41126059962802	4.20396899742703	2.90427965831286	3.54497674419106	3.65663697628436	5.63176564744481
ENSG00000127483	11.5462309871369	11.0649515440126	11.517520494896	11.7440618854371	11.6760963347009	11.9560479001477	11.2103108244149
ENSG00000075151	10.5611955765402	10.5963552523544	11.0213040606027	10.8631083695793	11.1085011617984	10.3656687863978	11.7390523928601
ENSG00000221808	3.28346946000656	4.2667716376633	4.32839041862219	3.27031744045796	2.58020695810024	3.77260308406909	5.47175430410685
ENSG00000233072	2.52747258896495	4.10618459694941	5.78003182925904	3.80455730830565	4.61343406309207	3.87993720504894	6.62983740905656
ENSG00000236073	3.16070707689657	5.57405246995406	5.54378948109294	3.0988763445592	3.02052882301288	3.97983584168637	6.35194672594708
ENSG00000266867	2.31363461767247	6.16935279751104	2.7676411147326	0	2.58020695810024	3.23947903556953	3.13880429617032
ENSG00000117298	11.7067053786015	13.0476147228682	11.8543848773796	11.805046992546	11.7560224147347	12.5517095620162	11.0810848892365
ENSG00000142794	2.71366837669273	3.18761300887002	3.65762523742616	2.90427965831286	3.02052882301288	5.43371565683224	4.32812344090413
ENSG00000076864	3.16070707689657	2.82441493502978	3.83590915873503	2.67928097903747	3.7872620982143	2.87448177217153	6.11969530601595
ENSG00000090686	10.0613658536981	8.77806144570287	9.27459509622394	11.0245488874464	11.1501964062708	10.137290446974	11.6342804775334
ENSG00000187942	2.87855725524597	4.66294991359728	1.80321559338192	4.19354868309829	3.25362320518174	4.16100570988994	3.97712668115064
ENSG00000142798	5.06888502984787	5.57405246995406	4.74037249381492	5.06316618343512	4.84534622437235	5.77699565808605	4.44765640149965
ENSG00000228397	3.02651875438447	1.59824879552092	3.83590915873503	3.56202644573208	3.45424297564438	2.05890482480417	2.98920973011426
ENSG00000218510	6.28621554841451	5.95029741048648	5.82296926318515	6.69629923420125	6.73195457422353	5.39804537877541	5.1925687930254
ENSG00000070831	13.3001542881056	13.679543795525	13.8371742905637	13.0888358705275	12.7321733790727	13.2220296436488	12.628925108693
ENSG00000230068	8.42344985013807	10.0899864124441	7.97531614094765	8.08357662199188	8.20376415417556	8.52901127351699	8.47151204310373
ENSG00000271840	6.24148140536947	6.70619262950823	6.50206009431387	5.56943478105997	5.97492968513291	6.73547651835367	7.28809282425012
ENSG00000184677	10.215805697077	8.43345385527378	8.88650365930201	10.4432970531211	10.6834193342604	9.7887329684105	9.19835391095238
ENSG00000237200	4.00819014552515	2.3378570285089	4.06779570150376	5.06316618343512	5.01366140218408	4.16100570988994	3.71651699463577
ENSG00000173372	8.14852421844877	7.19965673213275	8.42884662834136	4.19354868309829	4.11800203082925	6.84550457581941	6.5914154096929
ENSG00000159189	5.62790857511648	5.44568927656727	6.74468342508526	2.085159318413	1.64818696484463	3.65663697628436	3.27433421141826
ENSG00000173369	6.25654743399132	4.97344299326954	7.31766800340366	1.0573276937661	1.64818696484463	4.07326276388756	4.2644254661366
ENSG00000133216	8.45644534838528	7.11777177164864	7.25633430414584	7.88675712365608	7.90292233722467	6.60075339279275	6.8946555061959
ENSG00000272796	5.19936041834003	4.77403976778885	1.80321559338192	3.91207030110164	3.63034018261103	3.06849264354608	4.1279158850238
ENSG00000004487	9.67648896849229	9.30756462109444	9.65924853253961	9.86889541695754	9.75845877105765	10.1264323224278	11.1405064706447
ENSG00000169641	9.5461455642277	10.2281015033596	10.9254345613275	9.26202080514579	9.49812508142605	11.0581191448029	10.8014497290362
ENSG00000261326	0.843395306370566	3.71880372171819	2.93355869889295	5.27938070099007	5.19271687701898	1.03953588835187	5.41421454850831
ENSG00000125944	10.4294640624449	9.94319098585225	11.1014213180658	10.6300597629143	10.4450649546083	10.4968684195337	10.605710844994
ENSG00000125945	6.37172599642593	0	6.21021716803673	6.69629923420125	6.85232176816343	6.81877420782221	7.78456817034425
ENSG00000249087	2.31363461767247	3.47751911661863	1.41141623664498	3.56202644573208	4.94867227456321	3.06849264354608	4.7092305767412
ENSG00000204219	3.02651875438447	4.2667716376633	2.36455950793486	2.67928097903747	3.25362320518174	0	3.51230070833696
ENSG00000088280	6.06445683704917	4.10618459694941	4.13748839636131	4.35468608856605	4.28526085098457	3.77260308406909	5.47175430410685
ENSG00000007968	8.3052608184799	7.45439791385798	7.29497233114104	9.27718260365347	9.24595232137778	6.98427474438244	7.08183003201355
ENSG00000117318	6.16369681392023	8.24381946552907	5.38092154114533	4.69291160528579	4.98153275333896	6.70660645712112	6.32097068594381
ENSG00000142676	11.5799354019853	12.8501982561616	12.0796754047796	11.2910823531108	11.1388611981726	12.1628080692047	11.3318236006914
ENSG00000011007	9.45928218487795	9.5991739614974	10.3442243922337	9.73986127650002	9.56875734092755	10.4756354987319	9.24448029516783
ENSG00000236810	4.14401582757003	2.82441493502978	0	4.91594990284807	5.13546586614065	2.05890482480417	2.82228974443749
ENSG00000057757	8.63998534892812	9.59161053173572	10.75437045	8.72689799451028	8.53512676850587	9.11129522495792	10.1328086847594
ENSG00000011009	9.83167302333438	9.39706467247955	9.61565039824946	9.08091500193849	9.19432400137274	9.71997380377192	9.75668717684502
ENSG00000117308	7.13741282843615	7.42064642058157	7.79296949332088	7.66647742328449	7.62990880196637	6.39899563171808	8.8205788415227
ENSG00000117305	7.22427277562482	6.96223778589868	7.73232108147957	8.49584450459512	8.70953168342989	6.79153921297475	7.41084976175075
ENSG00000179163	8.099232887793	7.53547576252964	9.95058361403328	8.79168036928254	8.47004096273321	8.13842862898349	7.02530292443521
ENSG00000188822	2.71366837669273	0	6.8313546901246	2.41258988407027	2.18818721642471	3.87993720504894	3.13880429617032
ENSG00000189266	8.04819770599258	9.2317388310459	9.20731561781723	8.39288702049046	8.14333285036187	8.7678312373058	8.10859200872908
ENSG00000188529	8.05682992983202	8.98274026856085	9.44576447657412	7.95119543270257	8.04182654520013	9.56172686893809	9.37838648653218
ENSG00000185436	3.02651875438447	3.71880372171819	2.93355869889295	1.66090413924776	0	3.39233067961497	0.901145829698065
ENSG00000001460	2.71366837669273	4.54258695386237	4.38679567446152	4.63131443218978	4.05764343471017	2.87448177217153	3.13880429617032
ENSG00000001461	7.43759506193516	5.85242736401778	6.51521088261861	7.79141641303724	7.78221990568501	6.53658551107092	7.84569605853513
ENSG00000117602	8.3828325654604	8.68872030173554	9.01704291948936	8.57976406728531	8.39884171707784	8.69253325763997	7.90955368794221
ENSG00000133226	11.4105371025907	11.686545604208	11.77528970957	11.4173430829038	11.3195991490564	11.8841427596327	11.496822337526
ENSG00000169504	9.42301753482659	9.33046552078866	10.3275478450356	9.51957259243445	9.16243624234704	10.0071976783092	10.0701548100351
ENSG00000020633	11.5300478580496	13.2334416863753	12.5197234032424	10.3339606827833	10.1331168568896	12.6528347315788	11.2171616097459
ENSG00000229162	2.06249186112524	3.71880372171819	3.91741677817488	1.0573276937661	0	3.77260308406909	2.63349908374298
ENSG00000264371	3.59928809165048	4.2667716376633	4.13748839636131	1.0573276937661	1.9433062058776	3.39233067961497	5.15793081578898
ENSG00000117614	9.10286572649329	9.99284397453427	10.1009878962627	9.27718260365347	9.3875371867331	9.88206323308201	9.859964984898
ENSG00000117616	11.389761820481	10.8344553389525	11.6730235604167	12.4500651768802	12.5260915996632	11.2428910134061	11.8894745763981
ENSG00000272432	3.28346946000656	2.82441493502978	3.99456469172968	3.27031744045796	3.25362320518174	3.06849264354608	2.41622991878119
ENSG00000261349	2.71366837669273	0	5.4372786629689	5.63367220648624	5.07584872236753	4.07326276388756	5.49968587121579
ENSG00000224183	3.77697631888484	0	0	3.42353226338762	3.54497674419106	2.05890482480417	2.63349908374298
ENSG00000259984	3.77697631888484	0	5.5178898648864	5.56943478105997	5.10596522064134	4.16100570988994	5.01041068592179
ENSG00000183726	10.3752802003805	10.0352798104042	10.8835818772627	10.4432970531211	10.3531039813037	10.1264323224278	9.92062722242087
ENSG00000252515	2.71366837669273	0	3.91741677817488	4.86333897989	4.80919159114902	3.97983584168637	4.50390308473326
ENSG00000204178	9.03239918507191	9.37960334081801	10.3106762720385	8.73789909006877	8.84961726835001	10.1209724601148	11.03828142311
ENSG00000157978	8.39989561777087	6.91453564667503	6.67608223907311	8.29696767765169	8.30134765752488	7.58539446281413	9.0193865320267
ENSG00000225643	2.31363461767247	0	0	2.41258988407027	2.88814603455711	2.3846756967756	4.8889431722982
ENSG00000117643	8.81301590641808	6.58953156334761	6.12699833238655	8.70837433994915	9.01548076200796	7.42627932180039	7.88328897202268
ENSG00000162430	10.6650598792316	10.9964381609602	11.1464890037782	10.2248059464589	10.0648011183131	10.8821057099014	10.2214413948875
ENSG00000228172	2.06249186112524	0	2.58013212780751	3.0988763445592	2.39747163545167	3.39233067961497	3.80871760677765
ENSG00000117640	9.07975720624145	7.51962061886877	8.07637208925114	9.02213231181343	9.17136488285897	8.41317237536382	9.04804304629414
ENSG00000223474	4.20741605952151	3.71880372171819	3.91741677817488	2.90427965831286	3.63034018261103	4.53399259181824	5.25944545529963
ENSG00000127423	5.31900825339626	4.66294991359728	4.26752059213666	3.56202644573208	2.88814603455711	6.12126013967843	5.70557352098211
ENSG00000236528	4.07770084731778	0	2.7676411147326	5.06316618343512	4.48181229406492	4.07326276388756	4.50390308473326
ENSG00000182749	8.3828325654604	7.48737781610064	7.02766896117629	8.77397510912442	8.81812622107649	9.03206035122744	8.75256172990786
ENSG00000117632	5.95788274631673	4.54258695386237	4.64787469213644	4.69291160528579	4.80919159114902	4.7755329522519	6.15525218943948
ENSG00000158006	6.86990979350214	6.86520216163989	6.74468342508526	7.85342550372041	7.75871549285743	6.94773263353757	6.39719836207634
ENSG00000175087	7.01871648921859	6.73394127233344	6.78866981699984	7.41556000153341	7.3878691652222	6.92284667100312	8.19654752397255
ENSG00000142684	7.81367568037209	8.70983399379623	7.15074681854286	7.13399950163994	6.70269107802975	7.30632946459434	6.30522963547155
ENSG00000142675	4.14401582757003	0	2.7676411147326	3.27031744045796	4.11800203082925	3.39233067961497	4.2644254661366
ENSG00000130695	9.45111989824323	10.6076485227224	10.5838565255511	9.23380344076545	9.37831281702466	10.129154524539	10.5533669563047
ENSG00000142669	12.759010488752	13.6061356302487	13.8684949925587	11.8416281683682	11.8999485739907	12.9726355125214	11.9993287065405
ENSG00000158062	12.7578528609675	12.9141306067485	12.0189386834447	12.412509233566	12.6213702095762	12.1346370517784	12.455269391607
ENSG00000169442	10.4492696086197	12.3820979030043	11.8140496604569	11.3224809901968	10.9051512794968	10.369127251642	8.95022105550243
ENSG00000176092	2.87855725524597	3.71880372171819	0.871836374156443	3.0988763445592	2.39747163545167	1.03953588835187	1.45159216230282
ENSG00000117682	8.65427639453307	8.31902916453228	8.92888723421495	9.112252849042	9.13348749081544	8.99373929811673	9.26496902359025
ENSG00000225891	4.5385071835112	5.85242736401778	2.93355869889295	5.43168492472469	5.66682895629427	3.65663697628436	3.27433421141826
ENSG00000198830	10.812520877868	10.9601873853197	11.0074107609369	11.0853901357511	10.7892906684051	11.4404801264445	9.87869889419158
ENSG00000117676	11.8270199342455	11.4828902560328	11.293984316245	11.6102786032881	11.524769409104	11.5491575470767	11.6917851561609
ENSG00000260063	3.8582351010964	3.71880372171819	3.08234782447163	3.68838235732035	4.11800203082925	3.06849264354608	4.1279158850238
ENSG00000117713	12.5582010946135	12.0802373968212	12.931943969313	12.5713641674604	12.5363224086075	12.8182084531583	12.6068232651782
ENSG00000266138	5.80230915779048	7.7545007440516	5.13050350220326	4.27636593605377	5.04509010912583	6.16436273185934	5.94786262848562
ENSG00000060642	7.03628280436617	6.46260033370346	6.76684425242718	7.45164617186997	7.47698736935766	6.7496977532876	7.76168163452438
ENSG00000204160	10.4639473547383	10.4068093351437	10.3256829397415	9.85717191139524	9.80739185323055	10.814374578389	11.0816625096061
ENSG00000175793	4.32642440952544	5.37695411708694	4.49695825262468	3.80455730830565	3.63034018261103	4.93337697972829	7.02530292443521
ENSG00000142751	8.51713090444707	9.18224070289397	8.80585681952534	8.68960975187476	8.87169732567877	9.67969020781461	9.49398627331479
ENSG00000198746	8.37595043434686	9.15170559754628	9.03541545613298	8.024904513118	8.09909817681256	9.43325230918351	8.71135190899208
ENSG00000090273	8.73179098300361	9.45656688406657	8.70042371801367	8.33610395916588	8.45256785197105	8.52488276606345	8.45019905356354
ENSG00000253368	6.91808148513836	10.2109261596368	7.18406596198084	5.89185541497393	6.18701474169348	7.09980066516554	8.23444304598332
ENSG00000158246	5.37530578225617	7.13868283560165	3.45416131789444	3.42353226338762	3.7872620982143	5.32394473428681	4.32812344090413
ENSG00000090020	10.5611955765402	10.4387761442632	10.5077687038784	10.3885013284638	10.3317585058186	10.7424176549774	11.1679646881566
ENSG00000142784	10.7500189843196	9.62533800590395	9.54687844264768	10.6300597629143	10.5521691865056	9.27264441357203	10.004655960518
ENSG00000186501	7.89294851489528	8.59347919380465	8.5359591712603	7.6968630664651	7.7251524005859	8.43093172277406	7.80709730254047
ENSG00000241547	3.77697631888484	3.71880372171819	4.06779570150376	3.56202644573208	3.99464891084152	4.7755329522519	5.29175607060064
ENSG00000142765	10.4026264920268	9.19227712170157	7.73794114266151	10.1945134071815	10.3609302492587	8.94204032720541	9.00484195556385
ENSG00000142733	8.57836736137802	7.64183541295177	7.32515457371116	8.53421347977886	8.75775414251981	7.42627932180039	7.89385230621846
ENSG00000181773	4.14401582757003	2.82441493502978	4.26752059213666	1.0573276937661	0	0	2.82228974443749
ENSG00000158195	12.9943038926579	12.4775177081284	12.6379084178535	12.611045410626	12.5736756881675	12.5089785836042	12.6126303754683
ENSG00000126705	8.37939560365411	9.79958072696205	9.51122270894718	8.06039331703212	8.29809031371444	9.10853908251988	11.3582856356432
ENSG00000000938	14.2033532149214	13.6597882080919	13.1857498704208	14.1968511373078	14.12905040908	13.5174516627966	13.2978673547109
ENSG00000126709	10.7573195540521	10.2594660332554	10.490393651927	8.62786837817014	8.34934534045482	9.49364773473533	8.76699882949635
ENSG00000009780	8.11997598584609	8.37297027230232	8.3206491956054	8.37889940173907	8.12138504263243	8.64005866129196	9.9257836112188
ENSG00000230833	2.52747258896495	0	1.41141623664498	3.27031744045796	3.85975436971083	4.16100570988994	5.29175607060064
ENSG00000117758	9.88233122680123	9.3213487369706	10.6774922133757	10.3614887268347	10.254039394014	10.0071976783092	10.9996810479089
ENSG00000269971	3.69086607913953	3.71880372171819	5.19729939793444	5.39508956267286	5.54020580626647	5.36147075495439	5.88571491467436
ENSG00000270031	3.69086607913953	3.71880372171819	3.21721640213654	3.80455730830565	4.05764343471017	4.8826572049622	4.97104699371942
ENSG00000117751	7.84889468332928	8.59347919380465	8.86355082507408	8.3742065619205	8.20027858665741	8.49564760009558	7.88858030711839
ENSG00000252947	4.80761810241189	6.83988803350887	5.06046422335979	4.49962036183748	4.23163395535553	4.65981180628129	5.44327126829131
ENSG00000130775	13.7213909484008	14.0885770083793	13.9168328394758	13.4706929750732	13.4836740458731	13.8039103142914	13.5336527709808
ENSG00000117748	7.71895559338557	6.08567826021284	8.37936237655358	8.71581236643046	8.51842890162	8.11115026952855	6.27322272619536
ENSG00000130768	3.69086607913953	5.06367942570183	2.93355869889295	3.0988763445592	3.45424297564438	4.32194201456219	6.00744337156111
ENSG00000158156	9.03894936814863	8.94762125014873	9.49471958841224	8.99793179643514	8.75062272984539	9.6073449472503	8.61248849946164
ENSG00000158161	8.60215222934175	7.67083727965373	8.10274711628745	9.35068977950469	9.30231440448248	8.06071052909593	8.65347219275533
ENSG00000238231	1.75821945050536	0	3.83590915873503	3.68838235732035	3.35741753305583	1.63743986325387	3.89537809682773
ENSG00000240750	2.06249186112524	2.82441493502978	3.21721640213654	2.41258988407027	3.02052882301288	1.63743986325387	3.80871760677765
ENSG00000214812	3.69086607913953	4.66294991359728	3.45416131789444	2.67928097903747	4.11800203082925	2.65026627927602	3.97712668115064
ENSG00000253005	2.06249186112524	2.82441493502978	3.65762523742616	2.67928097903747	3.02052882301288	0	3.27433421141826
ENSG00000252429	1.75821945050536	0	3.08234782447163	4.0121238580642	3.7872620982143	1.03953588835187	2.41622991878119
ENSG00000169403	11.9222122154622	12.5756679601162	13.0862711522877	11.9676928029166	11.7266423056077	11.1413767567281	10.2287612712214
ENSG00000126698	8.92333762928367	9.74266799902434	9.90634849516696	9.43422321214503	9.1766956630759	9.06370930022134	8.89870480275237
ENSG00000130770	6.88937190662513	7.07501778865465	7.09051998000221	7.58758965833576	7.33163015527937	5.98364145099753	7.1092841540905
ENSG00000270605	2.71366837669273	3.18761300887002	3.74951942146031	3.91207030110164	3.99464891084152	3.39233067961497	4.44765640149965
ENSG00000130766	8.87290196318533	11.2456855331189	10.6694271385153	8.38823953315193	8.45549477282649	11.0013055424824	9.95885827111933
ENSG00000130772	6.61324701568946	9.08862534168007	6.34888931925683	7.42466651735745	7.15564329445281	7.09980066516554	5.41421454850831
ENSG00000204138	9.97177394520835	10.1452796291736	10.5531044414127	9.91000413401121	9.78313276518305	10.544549829489	10.8865529030754
ENSG00000229820	3.50150062063204	0	4.38679567446152	3.27031744045796	4.23163395535553	3.39233067961497	4.38912753927669
ENSG00000221216	0.843395306370566	4.10618459694941	3.21721640213654	0	3.35741753305583	1.63743986325387	3.80871760677765
ENSG00000180198	7.80857346810952	8.67447086439774	7.80907687046921	8.10072284741195	7.9658578068726	8.07772047284798	7.62253504857782
ENSG00000242125	10.5642260373239	12.1280770875194	11.2709099704359	10.6660214855814	10.5098544254625	11.0278054795912	11.2318075749477
ENSG00000200087	11.084631790827	13.3950572000131	11.3044379685896	10.3977797013926	10.0386910007461	11.394834576826	11.1657871603041
ENSG00000180098	7.21658899860535	6.20943785841715	7.09051998000221	8.06622416260264	8.18625148951066	7.68495796289944	7.82928002235377
ENSG00000197989	6.61324701568946	7.58202177441776	8.79780761467003	8.68960975187476	9.06231260057238	6.81877420782221	9.08077173348572
ENSG00000221539	0.843395306370566	1.59824879552092	4.06779570150376	4.56696956045767	4.52703367828901	3.06849264354608	4.75630063197813
ENSG00000120656	7.66351572553618	7.88398522699462	7.93184433746873	8.42500686532622	8.11028464545034	7.88503300543308	7.53075991358786
ENSG00000188060	0	3.71880372171819	2.93355869889295	1.0573276937661	0.775231766808725	2.65026627927602	4.05449043122323
ENSG00000229388	1.37213626134902	3.92545733628	2.7676411147326	2.90427965831286	2.39747163545167	3.23947903556953	0
ENSG00000270103	10.0559937180979	12.2968765981564	10.7481181047047	11.1998772973739	10.1202634823009	9.69814048694932	10.0921078601365
ENSG00000162419	9.47868529657296	10.4905287953414	10.7185767795789	9.13462391351563	8.91486880125944	10.2238822783657	8.75256172990786
ENSG00000198492	10.2282778765132	10.4218153663995	11.0293471252795	10.1416478676244	10.0932686910092	11.0595468862553	10.5162462448814
ENSG00000159023	10.8067750118663	9.7460786823703	9.713026751012	10.9602458276879	10.8677386263484	10.4562549603183	10.8181836654088
ENSG00000225750	4.43635943476301	5.634190616605	4.59930241668139	3.80455730830565	4.11800203082925	4.7755329522519	4.66057284562319
ENSG00000116350	10.4928623160109	10.8755203467741	11.1289513613617	10.0636396033451	10.1276222839491	10.9575601027213	10.9095089781101
ENSG00000116353	5.40265159356891	5.51129803534179	3.99456469172968	5.78276653947435	5.74546345618019	4.3961429931308	3.27433421141826
ENSG00000060656	4.76610961001424	5.37695411708694	4.59930241668139	3.27031744045796	3.45424297564438	4.46671360872394	4.75630063197813
ENSG00000162510	3.8582351010964	4.10618459694941	2.36455950793486	2.41258988407027	3.7872620982143	4.46671360872394	5.22639460102414
ENSG00000186056	4.92542564221765	5.74743165100522	5.29202986317183	5.35754171045242	5.97492968513291	4.65981180628129	6.0267690909775
ENSG00000162511	14.850606283745	15.8272635738783	15.9638542791648	14.5895219832361	14.3257185780526	15.6475449066102	14.4600277986633
ENSG00000264773	7.58213666558335	7.23891981900778	7.18406596198084	6.33983958163003	6.18701474169348	8.00251710235274	7.45431804640136
ENSG00000162512	8.69355422400525	8.57825216963382	9.85296596611382	6.39647864772677	6.33421208139282	8.61697180718805	7.74427527580243
ENSG00000134644	10.9139981987425	10.9017520803669	11.8582603099038	11.34543965446	11.2780435954263	11.7303904327791	11.8738854404885
ENSG00000202107	3.02651875438447	2.3378570285089	4.38679567446152	3.42353226338762	3.63034018261103	4.3961429931308	4.55803890497379
ENSG00000200181	2.31363461767247	2.82441493502978	3.99456469172968	3.56202644573208	2.88814603455711	3.87993720504894	4.1279158850238
ENSG00000060688	8.35860009008241	8.91162596685568	9.28614896791909	8.87708702894494	8.84068974819924	9.18378783469643	8.48903546603026
ENSG00000229447	4.38243881584995	0	5.13050350220326	4.63131443218978	4.43512744608647	5.28541649545005	4.38912753927669
ENSG00000121766	7.7670928527552	8.05872773980707	8.15829074577228	7.9448795859157	7.76816325956674	7.79190099281365	8.68422443502073
ENSG00000168528	7.5085322807316	9.93424850613767	8.6536173125302	7.9448795859157	7.97812202651971	8.11115026952855	7.29607886010553
ENSG00000223907	2.71366837669273	5.30477962313168	2.93355869889295	0	0.775231766808725	2.3846756967756	1.45159216230282
ENSG00000142910	1.37213626134902	8.9711286583916	6.97152764306758	1.0573276937661	0	6.266801002692	4.32812344090413
ENSG00000162517	9.44620026773863	9.61044527472043	9.69724696837028	9.26962162190382	9.25605992243984	9.49997121892465	8.67812620385355
ENSG00000235790	4.26814701610236	3.71880372171819	4.54903767577975	4.0121238580642	3.71093363876742	4.07326276388756	3.80871760677765
ENSG00000121753	2.52747258896495	4.97344299326954	0.871836374156443	1.0573276937661	3.25362320518174	2.05890482480417	2.63349908374298
ENSG00000269967	7.0275263826507	5.228803390048	5.98297778958954	6.9819038797432	7.21902051079987	7.28695729539941	7.90433885811419
ENSG00000184007	13.6529399686901	13.9276182300845	14.0338921398558	13.0167083471939	12.7444908214535	14.0031030563346	12.9939454027694
ENSG00000121774	11.1631824125035	10.8677134785529	11.0932232485025	11.0982527644608	10.9274581102541	11.4616930338765	11.5890882473519
ENSG00000121775	8.17651847933799	7.11777177164864	7.3025772949223	8.6933822454027	8.46714343422768	8.31138450934987	8.56700998646431
ENSG00000025800	10.250083311648	10.2666081831606	11.1198329268618	10.5132635878596	10.3317585058186	10.9667203571443	11.1938418435407
ENSG00000084652	10.2273222967991	9.62903729090148	10.3040614485559	9.71965577665484	9.49101052344862	10.3318024487532	8.89608006260386
ENSG00000160050	4.48833717165801	4.10618459694941	3.08234782447163	4.69291160528579	4.23163395535553	4.46671360872394	4.8889431722982
ENSG00000224066	7.01871648921859	7.03095800415742	6.78866981699984	5.31899045793984	6.62162262899097	6.07683003226659	6.39719836207634
ENSG00000160051	3.02651875438447	6.35949002450787	4.59930241668139	4.49962036183748	3.71093363876742	3.53052810100398	4.55803890497379
ENSG00000160055	8.06541081066296	8.24381946552907	8.05401847446769	8.2769940782611	8.25169799975094	7.2170297976837	8.00521387373454
ENSG00000084623	10.2129121249758	11.351352996679	10.820753295383	9.98117101410947	9.63351012473007	10.272709217596	9.45350063277385
ENSG00000182866	5.29001363955669	2.3378570285089	3.83590915873503	5.993272291738	5.01366140218408	0	1.84905688366074
ENSG00000116478	9.74485915110386	9.27959488670517	9.54367318184045	9.95783662348885	9.68054879262355	9.49153373241643	9.10142618657017
ENSG00000175130	10.8626138567569	12.346028553342	11.8797088741461	9.34350532663754	8.94016489071017	12.3940008927026	10.2597181993941
ENSG00000162526	3.59928809165048	3.18761300887002	3.559477134893	4.10568625799139	4.11800203082925	3.53052810100398	4.66057284562319
ENSG00000225828	8.53268541606325	8.88092827555166	8.77884962895854	7.86685070233666	8.14333285036187	9.73970149950711	9.26089448979367
ENSG00000160058	9.89442167371212	10.48645621966	10.4352479303731	10.0680051260983	10.1593828911987	10.6478228078059	10.6562218967434
ENSG00000160062	2.31363461767247	4.54258695386237	4.13748839636131	2.67928097903747	1.9433062058776	3.23947903556953	4.1977846616995
ENSG00000176261	7.8389195352204	7.72714848141846	8.12436385495715	8.20482495517457	8.27839027866507	7.8655760393103	7.47557071805025
ENSG00000162521	11.1303322739869	10.2207656649629	10.6389628302544	11.3966665458534	11.1668107466606	11.0285346852813	10.9775057027141
ENSG00000162522	8.03077674560328	8.04771417168809	8.17081042115707	7.46052842237274	7.4595986951853	7.2474146720918	7.73255325824677
ENSG00000134684	10.0089484407495	10.3741181337649	10.9708879399817	9.85211824117992	9.90697292363554	10.4905312908679	11.3814588987023
ENSG00000116497	8.53268541606325	6.70619262950823	7.6748824729379	9.53857166751987	9.71515321764165	7.96643993371461	9.28115304953047
ENSG00000116514	11.4779715841658	12.2621607122546	11.3587944822788	10.7123073066633	10.5280422003382	12.5934576486181	10.778118970922
ENSG00000004455	10.2519639526941	8.50766886377107	8.67428221550914	10.7688220057729	10.5576277297319	9.01744169576976	10.8209538809629
ENSG00000142920	1.75821945050536	2.82441493502978	2.93355869889295	2.90427965831286	2.39747163545167	3.87993720504894	5.47175430410685
ENSG00000116525	8.38968202234414	8.54730732676368	9.16413669703917	8.26183028789353	8.32394543405824	9.53323619649084	9.89981537071401
ENSG00000160094	9.0345858854747	9.09933211942216	9.04451472343016	8.46086041536107	8.49586012878851	9.3067092738982	8.4994482558222
ENSG00000270115	4.92542564221765	0	4.54903767577975	5.31899045793984	5.78322975496594	5.59992719236522	6.04583934967861
ENSG00000184389	4.99893777460154	4.10618459694941	5.92503419001442	2.90427965831286	4.11800203082925	6.03098803180369	6.95642737580232
ENSG00000134686	11.1164638481907	12.8807741655508	12.8441287015194	10.7535450263022	10.5630656979793	12.2965644656012	11.5690428386202
ENSG00000266239	3.02651875438447	2.82441493502978	4.44292819458115	2.90427965831286	3.63034018261103	5.28541649545005	4.80188335580512
ENSG00000222112	4.67932834130867	4.77403976778885	6.12699833238655	5.83834182127342	5.60490612578676	7.16492147685525	6.80795026919743
ENSG00000121903	3.59928809165048	0	3.65762523742616	5.23865266772122	4.80919159114902	3.77260308406909	3.13880429617032
ENSG00000163866	8.45970377020292	9.37520478514151	9.03313164371372	8.85367835608367	8.63144819616416	8.86247978822974	9.45884624604509
ENSG00000116544	4.80761810241189	5.06367942570183	4.69486477337447	7.28163764758127	7.16282427086376	5.77699565808605	5.29175607060064
ENSG00000241014	5.53210714231874	4.54258695386237	5.22957231153101	6.26068665573752	6.53572610511303	6.0075089610779	6.11969530601595
ENSG00000163867	9.07763796102297	8.68872030173554	9.14734157260903	9.57991690564793	9.67176642222137	9.37710462970261	9.92062722242087
ENSG00000197056	6.60149469796644	4.10618459694941	6.02035305947348	7.64326069607717	7.81449573611612	5.83149758792892	6.65489512191928
ENSG00000116560	13.2151053644576	13.3074499656856	14.0942208569527	13.1413932762344	13.0647006260693	13.6504743191427	13.8558098214348
ENSG00000146463	10.4102251558668	8.98851121440328	9.59412193808118	10.7353625144492	10.6765371462451	9.60343492329866	10.2412238669337
ENSG00000229994	2.71366837669273	3.71880372171819	3.83590915873503	4.19354868309829	3.99464891084152	3.23947903556953	5.44327126829131
ENSG00000142687	10.1787178593353	8.68872030173554	8.34663070491091	10.7661377963659	10.9705515473106	8.95129933765212	9.25271073632026
ENSG00000020129	7.99079298651813	5.80088446224794	5.78003182925904	8.29696767765169	8.22450254466326	5.80450397848196	5.58037548184334
ENSG00000239636	5.90149020610994	5.06367942570183	3.08234782447163	6.11077268077387	5.58366012892633	5.50251466960418	4.38912753927669
ENSG00000116819	5.62790857511648	3.71880372171819	4.38679567446152	5.69517090817399	5.42547385521944	4.83008913572637	4.1279158850238
ENSG00000126067	10.1588081273044	11.0276023616052	10.956498072765	10.1797977033135	9.73456078534974	10.4189213728406	9.82727266064405
ENSG00000142686	6.57769889728329	6.16935279751104	6.25793766544168	6.89283998885251	7.20517533144348	6.98427474438244	6.98634898162409
ENSG00000092853	5.4558356869199	3.71880372171819	5.46465259151805	4.63131443218978	4.57088056931403	5.63098925509111	4.80188335580512
ENSG00000134698	11.8511031558703	10.9587182354008	11.5224134725228	12.2691556265492	12.3773796323918	11.6982128646882	11.4070338868048
ENSG00000092847	11.8609947050541	12.1938689385444	12.0730209017409	12.0234534906447	12.134209462656	13.1378596811083	13.5920855706759
ENSG00000126070	10.5611955765402	10.0099683841775	9.48806511627664	10.9068191236755	10.9918770124465	10.5373948435643	11.0914468367145
ENSG00000092850	3.39659994465825	3.71880372171819	1.41141623664498	3.42353226338762	2.39747163545167	2.65026627927602	5.12244070691391
ENSG00000116863	8.13228018018934	7.78134406533744	7.7153283329937	8.20482495517457	8.09909817681256	7.79190099281365	7.78456817034425
ENSG00000171812	7.40416054773136	6.61959308374914	5.94460844478479	8.01287822694986	7.87695875066406	7.33490854771911	7.153911008944
ENSG00000054116	8.46619861851931	8.37297027230232	8.51319837622393	8.82988358891514	8.72416841533858	8.3161704075235	7.95060732264469
ENSG00000116871	12.2732370674177	13.5393955584877	12.7819009743692	11.817632152811	11.785106999007	13.3440639231748	12.4861390689458
ENSG00000054118	11.0766954532119	11.2238351699054	11.9930284821311	11.4550528152955	11.2948914336978	10.9758228161799	11.5723346420328
ENSG00000214193	6.71491990585657	11.5182276197717	8.74854586252182	4.86333897989	5.13546586614065	7.57744340360817	10.1372609262763
ENSG00000142694	7.43759506193516	9.07783851047203	7.86150523069931	6.19833507676299	6.09990894493305	7.12183582647584	7.47557071805025
ENSG00000116883	4.48833717165801	8.41643002004009	6.17750338550684	2.41258988407027	2.74237703473556	4.07326276388756	7.85112682167269
ENSG00000196182	11.4536645203987	12.7244330008382	12.5741469836206	11.0745829760647	10.8835811378697	11.5136600079235	11.5566312460609
ENSG00000181817	8.49824138234374	8.02543154665148	8.55518663783429	8.68203504121284	8.47004096273321	8.06071052909593	8.29944896515794
ENSG00000116885	2.52747258896495	0	4.20396899742703	3.0988763445592	3.25362320518174	4.53399259181824	7.03487925858399
ENSG00000116898	8.21559086864714	8.6600792808363	8.80852993891634	8.98875090940823	8.90633723764915	9.08349395260873	9.60422628253762
ENSG00000119535	13.9865410938393	14.3491887066933	14.0368160835027	14.1151847161158	14.4157273160795	14.2799073088409	14.2686051824798
ENSG00000233621	4.76610961001424	5.74743165100522	4.26752059213666	4.75198616883089	4.61343406309207	4.59827337071226	5.84274412497933
ENSG00000163874	10.6650598792316	11.507214574743	10.9756528428764	9.36258492892821	9.49954379249154	10.8756360236676	11.1153391588241
ENSG00000163875	8.90910645451135	8.62345941725943	9.2472706883613	9.36495223474694	9.15345199941688	9.04076096680823	8.51663761503004
ENSG00000263675	1.75821945050536	0	2.93355869889295	2.67928097903747	2.74237703473556	3.77260308406909	3.13880429617032
ENSG00000163877	9.35814789552349	9.99284397453427	10.3913457234878	8.82301237265123	8.83170663962677	9.9139844259247	10.3904164295537
ENSG00000134697	9.6396132933094	9.42286669203538	9.9212447456487	9.31685193343692	9.5331809236298	9.69446925934546	9.2236963949064
ENSG00000116922	5.06888502984787	2.82441493502978	4.38679567446152	5.89185541497393	5.92512256732836	5.53572172234859	5.94786262848562
ENSG00000134690	3.8582351010964	3.47751911661863	3.83590915873503	3.42353226338762	3.54497674419106	5.43371565683224	2.16033764350512
ENSG00000185090	2.52747258896495	0	1.41141623664498	2.90427965831286	2.88814603455711	2.3846756967756	0
ENSG00000233728	2.87855725524597	0	0.871836374156443	2.41258988407027	3.25362320518174	3.06849264354608	3.71651699463577
ENSG00000196449	8.5419382572994	7.85900138994838	8.01288785664205	7.35015223333218	7.40007449324635	8.08895002843955	7.47557071805025
ENSG00000197982	7.47027224794351	8.22438804001409	7.68655459839544	6.32045474299892	6.06966441788357	7.6923394808541	6.27322272619536
ENSG00000188786	10.4517262931701	10.1113011236943	11.214078409269	10.7390173956027	10.6821704668218	10.7801442635787	11.1504517388171
ENSG00000230610	2.31363461767247	0	2.58013212780751	2.67928097903747	3.71093363876742	2.65026627927602	3.51230070833696
ENSG00000204084	9.6032442910658	9.62162921099856	9.62174283838547	10.0371653680288	10.2362793378057	10.6315959282438	10.9108097859004
ENSG00000183431	9.88596901171334	11.3081652841383	11.4583239296901	9.738036061937	9.90804166144928	11.8046386762728	12.5720977446011
ENSG00000183386	9.10078018044588	9.77974924409023	10.2588444058178	9.2746666767415	9.18200681847025	11.0182921119589	11.7926027890312
ENSG00000183520	7.12925087505897	7.35067805578218	7.97055012403203	7.73396669279689	7.48846446400623	8.04925811599086	8.69332372051838
ENSG00000116954	8.52958790097525	8.15423988071435	9.66957773220014	9.17835150264072	8.92967870266276	9.27756034483968	9.00484195556385
ENSG00000228436	4.00819014552515	5.14860253177577	4.44292819458115	5.0157438459489	4.52703367828901	4.59827337071226	4.7092305767412
ENSG00000214114	7.45075488575672	5.51129803534179	5.32227308575772	7.57945834197662	6.97161678325154	6.41692926732276	5.79845405129656
ENSG00000174574	10.6286110708706	11.3867449466858	11.4990225956874	10.1703544031481	9.97280331819699	11.2807209860491	11.0239270387417
ENSG00000168653	7.23191584564647	6.76116625686587	6.99048519881172	7.28163764758127	7.25977625321675	7.49542548682776	6.8410783728594
ENSG00000127603	13.1878569464221	11.9605594626965	13.0463457592701	13.4486813057281	13.6774118425117	12.5341013334022	13.3352842110951
ENSG00000270040	2.06249186112524	0	3.21721640213654	2.085159318413	2.39747163545167	3.23947903556953	3.97712668115064
ENSG00000255103	8.67964886379784	7.68512247366624	8.23580679139662	8.41132868739859	8.87607307333702	8.17049609084044	9.31298642483176
ENSG00000182109	4.92542564221765	6.42904243238721	5.40937527483834	6.37784493806317	7.02775812868656	5.90957419091793	6.71569900228653
ENSG00000243970	3.77697631888484	0	5.26113905215424	5.0157438459489	6.08486593539482	4.53399259181824	5.52708691895972
ENSG00000090621	12.3631997349683	13.0186481265188	12.9533892651547	12.2323536555558	11.9138479783815	12.6499942893134	11.7528995053481
ENSG00000201457	6.38549766001568	6.83988803350887	6.79946001610653	5.96857858021218	6.15855985334766	6.18544054593997	5.38456055948192
ENSG00000163909	3.16070707689657	3.92545733628	2.11101898638035	2.085159318413	2.88814603455711	2.3846756967756	0
ENSG00000116983	3.50150062063204	6.67789978807748	3.83590915873503	2.085159318413	1.9433062058776	1.63743986325387	2.63349908374298
ENSG00000084072	7.7775753530738	7.38608636561563	7.10798572404885	7.86015371922795	7.76344711001356	8.72887992468999	7.18864447903443
ENSG00000116985	5.92053369384829	6.20943785841715	4.69486477337447	5.69517090817399	5.40139046846077	5.1632445922549	7.00595742256459
ENSG00000198754	3.8582351010964	0	1.80321559338192	2.41258988407027	1.27675269354415	3.23947903556953	5.1925687930254
ENSG00000043514	7.44418997878095	7.13868283560165	7.06391838694317	8.6858273678106	8.66975848931508	8.4397300830817	9.41368228084203
ENSG00000202222	1.37213626134902	0	2.7676411147326	4.27636593605377	3.99464891084152	3.65663697628436	4.84606987040974
ENSG00000116990	10.0266333671355	7.43762086594757	7.96576831013501	9.78475692492998	9.73214906906145	9.86256590160692	9.06916796436476
ENSG00000168389	8.29799755692176	8.2534379069476	8.51973818451476	8.95771900870798	8.97933144581709	8.58163367168703	10.296010456195
ENSG00000228477	5.67352468514164	3.71880372171819	6.03868375659619	5.10907919827554	5.89093612963614	5.39804537877541	7.48258593385945
ENSG00000131236	12.895803624482	12.0467483108598	12.8116857753565	13.0748044300672	12.7046067844445	11.9025572552579	11.7911908572817
ENSG00000131238	11.5319839672414	11.4900273123775	12.9415653268183	12.2886139488753	11.921541796333	12.1614789926188	10.9631575648249
ENSG00000117000	10.1856218567905	11.0553608810351	11.8186979449044	10.356738816063	10.2715834740623	11.3436013634882	11.3800507742567
ENSG00000207508	3.50150062063204	0	4.86886878324354	4.19354868309829	4.23163395535553	2.05890482480417	5.52708691895972
ENSG00000259943	4.32642440952544	5.30477962313168	4.06779570150376	6.04142677877375	5.42547385521944	3.53052810100398	5.41421454850831
ENSG00000084073	8.72639024415284	6.96223778589868	8.02672876304031	9.24155398108818	8.84739056211788	7.97251579482563	7.60977637167302
ENSG00000049089	7.65785273905074	8.10196000852337	5.09590885028622	7.79141641303724	7.84159740916749	8.2426594492736	7.46143711345462
ENSG00000084070	13.0826812431172	11.3535906127894	11.1632939987166	12.8167839378058	12.7384954496864	12.0416167667835	11.7154262569705
ENSG00000213172	7.06223763325516	5.228803390048	5.06046422335979	6.58698145166972	7.22589359140973	5.95937243230624	5.94786262848562
ENSG00000187801	4.07770084731778	0	3.08234782447163	3.56202644573208	4.28526085098457	2.65026627927602	3.13880429617032
ENSG00000260920	3.59928809165048	4.2667716376633	2.58013212780751	3.56202644573208	4.52703367828901	1.63743986325387	3.13880429617032
ENSG00000187815	5.82269834678899	3.47751911661863	5.32227308575772	5.69517090817399	6.09990894493305	4.65981180628129	4.50390308473326
ENSG00000164002	5.65089691275652	4.87718372591781	6.61631241234671	6.11077268077387	6.1441191433168	6.05409110452312	5.44327126829131
ENSG00000117010	5.5071286878103	4.54258695386237	6.07466088557628	5.46737492781417	5.10596522064134	6.72111370210923	5.35428423090093
ENSG00000117016	5.48171013170767	5.228803390048	4.94858532820136	4.56696956045767	4.73404509862801	5.66139660513946	6.35194672594708
ENSG00000272145	7.45729005474287	7.59720927238264	7.66311514336689	7.67413404196743	7.19119599489088	7.20675761351333	7.43274760987062
ENSG00000066136	9.96834646056068	9.7046084635583	10.0156499108684	9.97808148211966	9.87890415794084	9.819395426933	9.04330631476334
ENSG00000117013	4.92542564221765	3.18761300887002	2.36455950793486	1.66090413924776	3.85975436971083	3.77260308406909	3.51230070833696
ENSG00000179862	8.69355422400525	9.67628423067986	8.11575598788492	7.73396669279689	7.93682922142894	8.07207274609089	8.60928715235115
ENSG00000171793	8.05252027416043	7.68512247366624	8.76790358391256	7.79141641303724	7.86819933862424	7.92943740114166	7.48956720264465
ENSG00000171790	2.87855725524597	0	2.36455950793486	2.90427965831286	1.9433062058776	1.03953588835187	4.61021658379842
ENSG00000010803	7.91210433942627	7.7545007440516	8.12006634128659	7.14506104684761	7.35689629984119	8.21217319157724	8.54707159023202
ENSG00000235358	3.8582351010964	4.77403976778885	0.871836374156443	0	2.18818721642471	2.3846756967756	3.89537809682773
ENSG00000204060	4.5385071835112	5.06367942570183	4.44292819458115	3.56202644573208	3.25362320518174	2.05890482480417	4.1279158850238
ENSG00000127129	3.02651875438447	4.10618459694941	1.41141623664498	2.67928097903747	1.27675269354415	3.39233067961497	3.39821835481663
ENSG00000127124	11.343768824132	11.2813831032125	11.4756667405997	10.3543579833213	10.5852831387987	11.5120966458706	10.004655960518
ENSG00000198815	10.4492696086197	10.5677291524517	11.5641382211072	10.5799933187578	10.460444820295	11.0709182353988	11.4479299511946
ENSG00000066185	3.59928809165048	0	1.80321559338192	3.91207030110164	3.45424297564438	1.03953588835187	2.82228974443749
ENSG00000127125	8.7924884366724	8.57057796237566	8.39723079633017	9.15391801615551	8.86730826582871	8.47867189313243	7.89910511012662
ENSG00000186409	6.19531566697493	5.30477962313168	4.26752059213666	6.37784493806317	6.84341101975361	3.87993720504894	4.7092305767412
ENSG00000171960	7.13741282843615	7.07501778865465	7.40504040182125	7.3309063921315	7.36936535270562	7.95421090359095	6.80795026919743
ENSG00000065978	11.9922322998476	12.6942937987589	12.6229897886211	11.6903296225098	11.5693598042003	12.1845628834954	11.3734612931313
ENSG00000117385	8.75584719272664	8.02543154665148	8.11143271779933	9.35307666845505	9.50802688549402	8.34923439391055	9.56510670067159
ENSG00000164008	6.86007938844453	7.09655315008832	6.72217687412481	6.9819038797432	6.99594535351344	7.29667589536822	7.26386600045964
ENSG00000177868	7.20886407865423	7.38608636561563	7.53984076802427	6.68118046928943	6.2149192402405	7.41739829346351	6.27322272619536
ENSG00000164010	8.82822207805943	8.1439343685303	8.04043814358652	9.23380344076545	9.10767188982661	8.89162957852303	7.46852122346252
ENSG00000164011	4.6338982806241	3.47751911661863	3.99456469172968	4.69291160528579	5.62584377668664	4.3961429931308	3.97712668115064
ENSG00000117394	7.55801671994762	10.6984719283769	9.3950896397425	5.83834182127342	5.62584377668664	7.63220199557331	7.99543791239207
ENSG00000117395	7.28431274662852	7.50358928994163	6.97152764306758	6.95701311859373	6.60062317872674	7.00813186587994	5.32335888006843
ENSG00000066056	2.31363461767247	0	2.36455950793486	3.56202644573208	3.25362320518174	2.3846756967756	1.84905688366074
ENSG00000234694	3.02651875438447	3.71880372171819	2.93355869889295	3.42353226338762	4.48181229406492	3.65663697628436	5.1925687930254
ENSG00000066322	9.45111989824323	9.52566822854308	9.73286367197175	9.79708133121213	9.58221032514682	9.67969020781461	8.93495840861833
ENSG00000159479	7.92630611779496	7.87154738992117	8.40784657594408	8.26690261449178	8.03401562539798	8.00844321745436	8.12213207035233
ENSG00000198198	11.5818057486094	11.3746766420588	11.0910292059686	11.5068866814583	11.9545017446053	11.123740900341	11.5080390084376
ENSG00000178922	5.37530578225617	6.24843920504504	4.20396899742703	3.91207030110164	5.10596522064134	5.36147075495439	5.38456055948192
ENSG00000229348	2.06249186112524	0	3.74951942146031	3.0988763445592	3.45424297564438	3.53052810100398	4.50390308473326
ENSG00000066135	10.0056082463263	9.52169378459218	9.98289201404684	9.93252345336548	9.96460852561438	10.3828787968889	10.024018805289
ENSG00000126091	6.97384151582512	7.13868283560165	5.49151677961848	6.58698145166972	6.97977197610917	6.43464271053256	6.78543455744774
ENSG00000117408	8.1075659504089	6.96223778589868	6.3041301054918	8.75243792965754	8.65200687362066	6.43464271053256	5.63176564744481
ENSG00000132768	7.62919949640188	6.89007976595666	5.94460844478479	7.61171219306622	7.47121440047944	6.46943019414137	5.08605547994802
ENSG00000117410	11.8124383565932	12.7924017918366	12.2630858777583	11.4349134685753	11.2755614716081	12.4038699521883	11.7265491990015
ENSG00000117411	4.26814701610236	4.41126059962802	4.49695825262468	4.49962036183748	5.49540187313454	4.8826572049622	6.11969530601595
ENSG00000159214	6.43930617943557	4.77403976778885	4.54903767577975	5.86534672500643	5.97492968513291	3.65663697628436	4.61021658379842
ENSG00000178028	8.96749864043194	8.45027914936669	8.70616917028245	8.96709886525079	9.03322132835824	9.20458577170052	8.1399900499606
ENSG00000117419	7.83390597739174	7.47098210269405	7.10798572404885	7.98236646266921	7.98218704041721	7.46126662340102	7.04439244578269
ENSG00000233602	2.71366837669273	0	2.11101898638035	3.91207030110164	4.65476828368984	2.87448177217153	1.45159216230282
ENSG00000187147	10.430294744804	10.8598641350064	10.5970588311164	10.4500024665129	10.3019847059276	11.0116689919278	10.0852113391677
ENSG00000126106	5.06888502984787	3.18761300887002	4.49695825262468	6.15521808676479	5.87353424854626	4.53399259181824	4.8889431722982
ENSG00000198520	8.29069754329934	9.00568682468622	8.48673859635692	8.3742065619205	8.4139674401316	8.15988593783245	7.77888048374573
ENSG00000199377	9.02361908804737	9.32591433029837	9.88877288131808	10.2208906308539	9.37522487391304	8.58560314874087	9.43734391295392
ENSG00000200169	8.03951352103085	7.62711287906224	8.8244654713966	8.64355319681125	8.05732265055152	7.55332387373019	8.37302188746984
ENSG00000142945	2.87855725524597	2.3378570285089	3.08234782447163	1.0573276937661	1.27675269354415	2.87448177217153	2.16033764350512
ENSG00000225721	3.77697631888484	3.18761300887002	3.91741677817488	3.68838235732035	3.35741753305583	4.3961429931308	3.51230070833696
ENSG00000142937	12.3776987413076	13.1216931612946	13.0865464966613	12.4241912116321	12.0476369211878	12.7675669221295	12.0262835671447
ENSG00000200913	4.26814701610236	6.20943785841715	4.82729547021179	4.10568625799139	4.65476828368984	4.3961429931308	4.8889431722982
ENSG00000142959	3.69086607913953	3.18761300887002	4.86886878324354	1.66090413924776	2.39747163545167	4.71883234332833	3.27433421141826
ENSG00000173846	12.4035199189792	13.992054690475	12.5676525171493	11.0882584246013	11.1434059742291	12.4297700787688	11.9999399982348
ENSG00000188396	7.13741282843615	8.16447229999671	7.63928856952375	7.5630569149615	7.35689629984119	7.12183582647584	6.8410783728594
ENSG00000222009	10.2687803056528	11.4403632461389	10.6024601527079	9.37203093410962	9.18200681847025	10.4211444141937	10.0840587070129
ENSG00000117425	6.1795928606126	6.58953156334761	5.40937527483834	7.03043298600894	6.3842214437017	5.20512868499163	6.25694898861024
ENSG00000070785	6.86007938844453	5.06367942570183	4.69486477337447	7.45164617186997	7.61427846357512	6.18544054593997	6.2238402311305
ENSG00000126107	9.62227055099168	9.64007857103897	9.09575021171115	9.67265370368317	9.70288955799239	9.44422430546021	9.91933524043573
ENSG00000126088	7.61757693511495	7.27714260647176	7.06391838694317	8.12327202193945	8.03009424958054	7.46988246147142	8.07185132470948
ENSG00000132781	8.34456799507294	7.93269123210935	7.3979581057399	8.0545388096522	8.09159205057072	7.85903163105492	7.18003919233345
ENSG00000132773	8.65427639453307	8.53946628189477	7.96576831013501	8.25163181823429	8.19328208592452	9.06086064184736	8.09033862156314
ENSG00000070759	7.62919949640188	4.77403976778885	5.9051906977386	7.74854501557193	7.49985097489092	6.93534331082566	7.84569605853513
ENSG00000236624	5.97620083107363	0	3.91741677817488	5.72496432297004	5.68689303038228	4.07326276388756	3.13880429617032
ENSG00000117450	9.25876923643246	8.08050580713427	8.74854586252182	9.95783662348885	9.50943589744318	8.68144826418803	7.92508602388009
ENSG00000117448	9.61935971638708	8.99425916774173	8.66840809971047	9.85380476564879	9.67050742218273	9.24027594734092	8.20080762939551
ENSG00000132780	9.22852528861116	6.98551013427799	8.78157321269874	8.8091709759127	9.04298374349228	9.26771167415658	9.09457417209641
ENSG00000159588	7.57012709886185	5.44568927656727	8.04950588638739	8.04275803580175	8.47293268346521	8.39519168568215	9.51979076096275
ENSG00000159592	11.4185130111212	11.2066086552404	12.1474910098981	11.658840199763	11.5564676245333	11.6383248508632	11.8712151128774
ENSG00000225447	3.39659994465825	0	5.66674086892645	5.0157438459489	5.66682895629427	4.65981180628129	6.7275582005088
ENSG00000234329	6.31528583016832	6.12812207138205	7.19227688545541	6.83936358835667	6.9046605172509	7.46126662340102	7.7731702852088
ENSG00000159596	7.5085322807316	7.03095800415742	6.74468342508526	8.28201346231679	8.26176556617463	7.08865557708429	6.66726263856125
ENSG00000197429	5.62790857511648	4.54258695386237	5.09590885028622	5.10907919827554	5.44916180219155	5.1632445922549	1.84905688366074
ENSG00000086015	8.70183355889318	8.61602256605888	8.37576198127001	8.85704579652975	9.19432400137274	8.35389656424543	9.6010065283975
ENSG00000117461	4.14401582757003	1.59824879552092	2.7676411147326	5.96857858021218	5.80174852339161	2.87448177217153	5.12244070691391
ENSG00000085998	7.48952909183514	5.14860253177577	5.61881024029456	7.4955204662138	7.74920544755837	6.5200874626139	5.84274412497933
ENSG00000085999	2.87855725524597	3.71880372171819	2.58013212780751	2.90427965831286	1.9433062058776	3.06849264354608	1.84905688366074
ENSG00000132128	9.6694703101454	9.57252664020981	9.99936393574052	9.86053121676269	9.81880197841036	9.53938888386452	10.3941415519835
ENSG00000173660	8.4629548492412	9.13098379793103	8.8890315779868	8.53421347977886	8.29482559876647	8.84271415779402	8.47503379665747
ENSG00000117481	9.43631039064476	8.74435100590321	9.0239600682597	9.05182302416817	9.06806111822606	9.79217226816874	8.14442021833848
ENSG00000225779	2.87855725524597	3.71880372171819	3.99456469172968	3.0988763445592	3.14177849754872	4.7755329522519	3.13880429617032
ENSG00000117480	8.43673874152707	7.80769703948299	6.28889636920962	8.6933822454027	8.90205246126101	8.20702892287863	7.88328897202268
ENSG00000079277	10.5474791721498	10.966049069646	10.8804093114979	10.3756453425782	10.5425667562316	10.2110917480329	10.9172962896763
ENSG00000142961	9.65390800669658	9.49356181297009	8.88397130337211	9.09524391767673	9.40278126959913	8.77132066761296	9.18120817769781
ENSG00000123472	7.6521674361129	7.403469877273	6.99048519881172	7.6968630664651	7.75871549285743	7.05469422216872	8.15323995085294
ENSG00000159658	11.2912403160054	10.6700257630308	10.7797935937807	11.4438990151417	11.1501964062708	11.1339417265278	10.7937146559052
ENSG00000233647	2.31363461767247	0	3.559477134893	2.41258988407027	3.25362320518174	3.53052810100398	5.04872881135868
ENSG00000162367	5.1026267004236	2.82441493502978	5.02412680010957	3.56202644573208	3.14177849754872	3.53052810100398	3.27433421141826
ENSG00000123473	6.75790552451967	7.2194218400429	7.31014238032911	6.50349302084445	6.15855985334766	6.84550457581941	5.98785525421123
ENSG00000162368	10.6860779329541	10.8724026670962	10.7529833797179	10.5615354302162	10.254039394014	10.8885465126627	10.0561156099532
ENSG00000237424	5.26042433317434	3.47751911661863	4.78448852620561	5.15357600954391	5.49540187313454	4.65981180628129	6.39719836207634
ENSG00000186564	3.59928809165048	3.92545733628	3.74951942146031	3.91207030110164	3.25362320518174	4.7755329522519	3.51230070833696
ENSG00000272491	4.5385071835112	0	1.41141623664498	4.10568625799139	3.45424297564438	3.06849264354608	3.27433421141826
ENSG00000132122	8.86555074760756	7.93269123210935	7.21663293618191	8.77397510912442	8.7070777256686	7.60116631564402	8.35019110845066
ENSG00000224986	4.72337138775065	0	2.7676411147326	3.56202644573208	4.77210756444987	2.65026627927602	4.1279158850238
ENSG00000185104	9.18587669265927	8.62345941725943	8.83236771305205	9.4137889007747	9.53179492357335	8.87226197275087	9.29516665839782
ENSG00000123080	5.58080291835333	5.44568927656727	6.40648680720027	6.41487475182742	6.05430101640249	6.79153921297475	6.78543455744774
ENSG00000123091	10.7809572694236	12.1781736212369	11.98743629716	9.84025704131952	9.78080095835659	11.5653283267266	10.8174902795846
ENSG00000085832	11.4155796461359	10.6336607001462	11.180421535052	11.6535244864666	11.616868098187	11.4729874775478	11.9653024166727
ENSG00000117859	10.6030534768382	9.83524521619521	11.332104456149	10.8731217651421	10.9072906616227	11.1949766472823	11.7691273478155
ENSG00000232846	4.99893777460154	3.47751911661863	5.02412680010957	4.42897248668723	4.61343406309207	6.266801002692	5.29175607060064
ENSG00000078618	10.8827809772379	10.2474833111913	10.3256829397415	11.1131156432605	11.1964177164849	9.34468041205289	9.84914964921992
ENSG00000266993	6.99195934666524	5.06367942570183	7.81440627913639	6.60311463552271	6.76063627385602	7.18599118854603	8.78413478160383
ENSG00000272175	4.58699099674475	0	4.64787469213644	3.0988763445592	3.25362320518174	3.53052810100398	5.63176564744481
ENSG00000117862	9.41800096661002	8.61602256605888	9.48806511627664	9.40920836741812	9.05268054217217	9.52292304592711	8.6720020861753
ENSG00000198841	7.3973796474919	7.47098210269405	7.42608104428817	7.43371591180566	7.08935349463972	7.87209089458035	6.90513624262699
ENSG00000134717	9.76607058700752	9.96969058133887	10.7502052319609	10.0222447910449	9.72852391848075	9.92028477635366	9.6281480837698
ENSG00000157077	2.31363461767247	7.33264258999079	7.93184433746873	2.67928097903747	2.39747163545167	5.28541649545005	4.32812344090413
ENSG00000154222	10.0900346958662	11.13166265019	10.531423919122	9.84873926600305	10.0609626440134	10.0765333543909	10.4453078463293
ENSG00000085840	5.26042433317434	5.228803390048	4.86886878324354	4.10568625799139	3.63034018261103	6.55289702595374	5.94786262848562
ENSG00000134748	9.56290782750982	10.1734185318758	9.80692020134327	9.69540587919436	9.68927802388309	9.87397134291686	9.48702640748705
ENSG00000134744	9.18980635750912	11.2262793948101	11.2762305315798	9.88052442336265	9.97993577547953	11.3610750413874	12.0618478116285
ENSG00000239063	4.72337138775065	4.10618459694941	4.13748839636131	3.80455730830565	4.11800203082925	4.46671360872394	4.80188335580512
ENSG00000116157	4.5385071835112	6.32341459670417	5.5178898648864	5.35754171045242	5.22051235652374	6.58497700037952	4.66057284562319
ENSG00000182183	2.71366837669273	8.05872773980707	4.38679567446152	4.19354868309829	3.14177849754872	6.46943019414137	3.80871760677765
ENSG00000162377	5.37530578225617	5.99685027579024	6.48878832727597	6.11077268077387	6.29553353202915	6.81877420782221	6.44107369323768
ENSG00000162378	9.90402160410256	9.50568560447695	10.0544526325959	10.3908265219208	10.1485721246853	10.3998859257674	10.0898126809175
ENSG00000121310	7.28431274662852	6.35949002450787	5.5178898648864	7.45164617186997	7.53348102750838	7.07742372038173	5.32335888006843
ENSG00000116171	9.88233122680123	9.1972692692669	9.34256984212026	9.94997386303822	9.68054879262355	9.22763057125908	8.53699809836773
ENSG00000157184	7.21658899860535	6.96223778589868	7.93673973199646	8.24136074161404	7.82358631321334	7.39947052358049	6.2238402311305
ENSG00000162384	7.57614437873714	5.85242736401778	6.05678446539218	8.19952919808544	7.98624063269106	6.36244539804985	6.45540721130167
ENSG00000162385	7.14552886573829	7.11777177164864	7.60279423792777	7.1560384250263	6.78875886043445	7.20675761351333	7.87797815857263
ENSG00000226754	2.52747258896495	4.41126059962802	2.36455950793486	1.66090413924776	3.14177849754872	2.87448177217153	2.41622991878119
ENSG00000270172	4.43635943476301	4.97344299326954	6.12699833238655	4.49962036183748	4.77210756444987	5.24583103298425	7.5839154460332
ENSG00000157193	7.64072917244172	7.71327539387474	8.19143809747038	8.11766768352163	8.05346420047334	8.49142236292529	9.76965009610084
ENSG00000058804	7.83390597739174	6.73394127233344	6.92301439175112	7.96374477788191	7.86819933862424	7.09980066516554	6.9961865154407
ENSG00000058799	8.24987352762722	7.15929513062184	8.27112017999558	8.53421347977886	8.34934534045482	8.37698406665673	7.92508602388009
ENSG00000081870	6.72578697802033	0	5.96392067041154	7.16693290735945	7.19820259511402	6.60075339279275	8.22192148133479
ENSG00000116212	6.57769889728329	5.99685027579024	6.8313546901246	6.48619949733735	6.5793135460776	7.08865557708429	7.38861440927288
ENSG00000272091	5.76064540669635	4.54258695386237	5.66674086892645	5.35754171045242	5.40139046846077	6.691951849183	5.58037548184334
ENSG00000116209	10.0462731739845	9.89176800012487	10.8081196041392	10.5238957271693	10.2200201257166	10.5995659396848	9.8300254952561
ENSG00000203276	5.42948870135878	6.61959308374914	5.38092154114533	5.66474922567674	5.89093612963614	6.91024083863757	6.46959972224831
ENSG00000116205	6.8301797662575	6.55883029519823	4.98685043944224	7.95119543270257	7.87258569254784	5.56818160163491	5.70557352098211
ENSG00000212670	4.5385071835112	0	1.41141623664498	4.63131443218978	4.61343406309207	2.3846756967756	2.82228974443749
ENSG00000248835	4.43635943476301	0	0	3.27031744045796	3.7872620982143	3.06849264354608	2.41622991878119
ENSG00000215883	4.48833717165801	3.71880372171819	1.80321559338192	5.23865266772122	5.70668188938076	4.16100570988994	3.71651699463577
ENSG00000116221	8.41675921849376	9.50568560447695	8.76515404667231	8.38823953315193	8.22793014431726	8.89802809656548	8.46089490517792
ENSG00000157216	9.154047985606	10.0980163776628	10.4837191500432	9.37203093410962	9.26942750259112	9.36560802640039	10.6907074760387
ENSG00000198711	1.37213626134902	4.54258695386237	2.93355869889295	0	0	3.06849264354608	3.71651699463577
ENSG00000162390	6.34378189757991	6.49539537033575	5.86466564213961	6.87965557037017	7.35062112591931	5.83149758792892	7.2474857717212
ENSG00000184313	3.8582351010964	0	2.93355869889295	1.66090413924776	3.71093363876742	2.05890482480417	4.97104699371942
ENSG00000243725	4.00819014552515	4.77403976778885	3.83590915873503	4.10568625799139	4.05764343471017	2.87448177217153	3.80871760677765
ENSG00000006555	3.16070707689657	0	2.7676411147326	3.56202644573208	3.54497674419106	1.03953588835187	0.901145829698065
ENSG00000116133	5.60454799494711	4.41126059962802	5.69012196495273	5.27938070099007	5.13546586614065	4.71883234332833	2.41622991878119
ENSG00000162402	11.768116507638	11.9539381860647	12.9844540477244	11.9096899952734	12.1360349643222	12.5793436837722	13.2177584549712
ENSG00000162407	4.88721545208304	10.8551339477135	9.18485933178415	4.56696956045767	4.77210756444987	8.70718199081288	4.38912753927669
ENSG00000162600	8.30163375856571	6.78788698201087	7.57794151283266	8.15644841930205	7.95762335422095	6.72111370210923	6.44107369323768
ENSG00000162601	10.1697924657866	10.2994785318423	11.5454311483619	10.7607543485974	10.7817308971587	11.1127799275544	11.0572011011511
ENSG00000177606	12.2799346575098	14.5606770142479	14.2039979412767	15.4976162767713	14.6311428460243	12.9504895449812	13.3093796111902
ENSG00000234807	3.39659994465825	4.66294991359728	5.16428799167219	6.60311463552271	5.40139046846077	2.87448177217153	3.61801924029512
ENSG00000232453	2.06249186112524	6.67789978807748	4.64787469213644	3.27031744045796	2.88814603455711	2.3846756967756	2.41622991878119
ENSG00000172456	5.88219197918911	5.95029741048648	5.78003182925904	6.61906940064924	6.84341101975361	5.56818160163491	5.35428423090093
ENSG00000162599	7.81875991180422	6.28641389541695	5.86466564213961	8.36477483749547	8.31752496408338	7.14353948817574	6.56522022739225
ENSG00000270742	2.52747258896495	0	2.58013212780751	4.19354868309829	4.05764343471017	2.65026627927602	3.13880429617032
ENSG00000162604	8.34456799507294	8.13355471168283	8.85581800728878	9.08952941786858	9.2030580475733	8.92020204026216	8.4994482558222
ENSG00000132849	2.87855725524597	0	2.11101898638035	5.10907919827554	4.88061691203016	1.63743986325387	3.13880429617032
ENSG00000240563	5.58080291835333	3.92545733628	4.69486477337447	5.27938070099007	5.40139046846077	2.87448177217153	3.80871760677765
ENSG00000162607	9.03239918507191	8.44189103010582	9.40041517721111	9.32417001155908	9.05654108589081	9.03496639051463	8.85071297589166
ENSG00000116641	8.06112674992278	7.55115855143806	8.50333274068389	8.68203504121284	8.82493240974106	7.26732145677282	7.74427527580243
ENSG00000213703	2.87855725524597	3.92545733628	4.06779570150376	2.41258988407027	2.88814603455711	3.39233067961497	2.16033764350512
ENSG00000125703	6.62490437107333	6.55883029519823	5.71313016954141	8.23619765117562	8.05346420047334	5.83149758792892	6.36718885713095
ENSG00000088035	7.4637957539417	6.39468532854321	6.00178645424474	7.9885206577719	8.2584175106983	6.73547651835367	6.38227163667504
ENSG00000142856	5.92053369384829	4.97344299326954	5.13050350220326	6.41487475182742	6.44438980708234	5.24583103298425	4.2644254661366
ENSG00000203965	3.9351600549912	1.59824879552092	3.91741677817488	5.39508956267286	5.300823246423	4.71883234332833	3.39821835481663
ENSG00000079739	8.37939560365411	8.24381946552907	8.23580679139662	8.92600492143449	8.66217738403826	8.93583447513137	8.25097118317315
ENSG00000244256	2.06249186112524	0	2.93355869889295	3.27031744045796	2.88814603455711	3.23947903556953	4.2644254661366
ENSG00000158966	2.87855725524597	3.47751911661863	1.80321559338192	3.80455730830565	3.71093363876742	3.53052810100398	2.16033764350512
ENSG00000162437	5.60454799494711	5.06367942570183	5.92503419001442	5.43168492472469	5.47246708580862	5.63098925509111	6.30522963547155
ENSG00000162434	12.4201323910407	12.3239459959476	12.7427796904467	12.446437105017	12.2791993138604	12.4820802884307	12.2015279149618
ENSG00000226891	4.99893777460154	1.59824879552092	4.54903767577975	5.81082177166205	6.34687787599195	3.06849264354608	2.41622991878119
ENSG00000265996	2.06249186112524	0	2.7676411147326	4.10568625799139	3.63034018261103	2.65026627927602	4.05449043122323
ENSG00000231485	1.75821945050536	3.71880372171819	1.41141623664498	2.90427965831286	3.45424297564438	1.63743986325387	2.41622991878119
ENSG00000162433	5.76064540669635	6.16935279751104	7.29497233114104	5.35754171045242	5.58366012892633	5.93468816486192	6.32097068594381
ENSG00000116675	3.28346946000656	3.18761300887002	3.08234782447163	1.0573276937661	2.74237703473556	1.03953588835187	2.16033764350512
ENSG00000116678	6.76845474794837	5.634190616605	5.92503419001442	6.85291966600736	6.51342839449543	5.07564192260167	5.38456055948192
ENSG00000213625	10.0847684533351	10.4659190885723	11.5482327282217	10.6573561907924	10.4763831175959	10.5157144805613	10.5162462448814
ENSG00000184588	12.0192605009387	11.8523729074148	11.7643165181731	10.0548687272935	9.75489921224467	12.3803554549638	11.0287277201236
ENSG00000152763	4.38243881584995	5.44568927656727	5.75807419187533	4.80873663814149	3.63034018261103	3.39233067961497	4.05449043122323
ENSG00000198160	10.914591959296	11.0262003161728	11.9145559631214	10.7830540496433	10.7020237650326	11.7254519168571	11.487698620048
ENSG00000116704	8.47266435876258	8.39051158342707	9.55645171818789	8.22059657991706	8.18977107043462	9.60343492329866	8.21351298425508
ENSG00000081985	4.43635943476301	2.3378570285089	1.80321559338192	3.91207030110164	3.02052882301288	1.63743986325387	1.45159216230282
ENSG00000142864	10.553591457309	10.1270830098855	10.4204705858465	10.9881559482493	10.6563275139266	10.0277670831145	10.5483609327966
ENSG00000116717	6.82007391844938	8.28191435782007	7.86150523069931	6.06491439370977	5.83808782983519	7.40846225595821	6.9361292159682
ENSG00000116729	7.93569689258675	6.12812207138205	6.48878832727597	9.16482846204726	9.18377286745845	6.43464271053256	6.18995377012667
ENSG00000234383	1.75821945050536	4.10618459694941	0	3.68838235732035	4.28526085098457	1.03953588835187	2.98920973011426
ENSG00000066557	8.23092826706552	8.03661587852153	8.95083146212794	8.61201115991428	8.44375129125482	8.98775234918983	9.43734391295392
ENSG00000244389	3.28346946000656	0	2.36455950793486	1.0573276937661	3.02052882301288	2.87448177217153	3.27433421141826
ENSG00000116754	11.3695494071267	11.3932853545685	12.2476563737352	11.5334375755127	11.619806441111	12.281349063445	12.9280227139115
ENSG00000118454	8.94906901803819	9.61418289499989	9.499690376723	9.10943191639018	9.19607504579403	9.51877705409156	9.89719265211597
ENSG00000197568	3.39659994465825	4.87718372591781	3.83590915873503	3.68838235732035	3.25362320518174	2.05890482480417	3.13880429617032
ENSG00000116761	6.99195934666524	5.99685027579024	5.73577719027462	4.35468608856605	3.92877767610173	4.98237402963518	5.55397722515395
ENSG00000132485	9.76211712533434	9.38398852672562	10.0121755025648	10.2313079518854	10.2913760396244	10.3908404129906	10.192854476612
ENSG00000207721	3.39659994465825	4.10618459694941	3.83590915873503	4.27636593605377	4.43512744608647	4.59827337071226	4.1977846616995
ENSG00000172260	4.99893777460154	3.47751911661863	5.02412680010957	5.35754171045242	5.19271687701898	5.20512868499163	5.01041068592179
ENSG00000254685	6.04723227831074	5.37695411708694	4.78448852620561	7.48685170056604	7.41819103338725	4.93337697972829	6.36718885713095
ENSG00000116791	5.90149020610994	0	2.36455950793486	5.0157438459489	4.73404509862801	3.65663697628436	3.51230070833696
ENSG00000162623	7.50222565583161	7.23891981900778	7.86150523069931	7.58758965833576	7.67078027994565	7.64747300566213	6.45540721130167
ENSG00000117054	7.47027224794351	6.35949002450787	6.07466088557628	7.68932644235207	7.75871549285743	6.12126013967843	7.08183003201355
ENSG00000137955	10.0741779452369	9.64374029915073	10.5993761598386	10.3943073005754	10.4487417264624	10.7512797325472	11.4139309111358
ENSG00000057468	3.02651875438447	3.92545733628	2.58013212780751	2.085159318413	3.14177849754872	3.87993720504894	3.27433421141826
ENSG00000184005	7.5640846165988	5.14860253177577	4.20396899742703	7.78435906745789	7.79151548709032	6.0075089610779	6.06466081336101
ENSG00000142892	7.36298867468283	5.14860253177577	6.39230157503434	8.01287822694986	7.46541823812738	5.53572172234859	6.04583934967861
ENSG00000226084	4.26814701610236	5.51129803534179	5.35189531514298	4.42897248668723	4.33696559891426	4.8826572049622	4.32812344090413
ENSG00000036549	8.69078385340027	8.55510598583127	8.97958067243911	9.19707330248542	9.29742890708843	8.9847495320543	8.02456928202777
ENSG00000077254	10.2415899567828	9.26064252919093	9.8412652632261	10.9084429346835	10.9489061203562	10.3163590336999	11.2959344578084
ENSG00000180488	8.38968202234414	8.37297027230232	8.84022690652428	8.7415475588937	8.87607307333702	8.83606497528191	9.3651619718343
ENSG00000235613	3.69086607913953	2.82441493502978	4.20396899742703	3.91207030110164	3.71093363876742	4.7755329522519	5.29175607060064
ENSG00000232015	2.52747258896495	3.47751911661863	3.21721640213654	1.66090413924776	3.14177849754872	3.06849264354608	3.80871760677765
ENSG00000162614	5.73935346350372	2.3378570285089	3.65762523742616	5.60191099361548	5.68689303038228	2.65026627927602	3.97712668115064
ENSG00000162613	10.7868066760629	10.163249591521	11.3733113556459	11.2104469020218	11.0109035622285	11.2843889385887	11.3298800222798
ENSG00000162616	6.27145775311893	7.17961707397036	7.88195447930643	7.27157872607296	6.97161678325154	7.31591886758568	7.85112682167269
ENSG00000273338	6.58964585803746	7.15929513062184	8.79780761467003	8.55923736385062	7.55000657435783	7.50384030955288	8.55041385074847
ENSG00000137959	10.7626059507323	9.31217397513362	8.21177499166769	9.44545177819084	9.35185218874493	8.69620940882088	9.33253139376451
ENSG00000137965	10.128418675027	8.9711286583916	9.2492396876097	9.41607372530172	9.50237703609229	8.96964097401557	9.09914579576081
ENSG00000137941	3.50150062063204	3.18761300887002	2.93355869889295	2.41258988407027	3.54497674419106	2.65026627927602	2.41622991878119
ENSG00000142875	8.61973703133439	7.29588083459809	7.83552919704267	9.06644234185876	8.76720818632571	7.38131716655757	7.73255325824677
ENSG00000117133	8.1075659504089	8.63085812925533	9.2472706883613	8.44751953264918	8.24155968478122	8.80575849169482	8.90132477629986
ENSG00000174021	10.209044978899	10.62257000344	11.2420326390423	9.94839615554553	9.74177183853321	10.3505855532931	9.92062722242087
ENSG00000122432	5.60454799494711	7.09655315008832	5.29202986317183	4.86333897989	5.42547385521944	4.71883234332833	5.82076904207356
ENSG00000117151	10.0784234821351	9.53358441921301	10.2955118653268	10.2557517277531	10.0838417768589	9.82779838318112	9.46417212533054
ENSG00000117155	6.74727859488482	6.04194781204247	6.68774470096846	6.30080588758724	6.17285744986775	6.55289702595374	7.57080904180184
ENSG00000153898	5.06888502984787	6.55883029519823	3.08234782447163	4.63131443218978	4.69495116024669	5.59992719236522	8.12661733139185
ENSG00000162642	8.60215222934175	8.88092827555166	9.28997978744117	8.68203504121284	8.68978214382676	8.98775234918983	10.1092062943121
ENSG00000142867	9.69042467182044	10.0980163776628	10.484555153428	9.21292943157334	8.96707754679395	9.87397134291686	9.7021365914864
ENSG00000223653	2.71366837669273	4.41126059962802	4.69486477337447	3.56202644573208	3.85975436971083	3.39233067961497	3.61801924029512
ENSG00000117174	7.07078650521058	6.98551013427799	7.46048090467435	7.19913126745412	6.74157863674475	7.63220199557331	6.94631399399563
ENSG00000171502	5.76064540669635	7.07501778865465	6.74468342508526	5.86534672500643	5.87353424854626	6.46943019414137	5.58037548184334
ENSG00000122417	7.85385651205513	7.76798483589822	9.32960095728937	8.12327202193945	8.14333285036187	8.49564760009558	9.82451456325084
ENSG00000261737	4.00819014552515	5.06367942570183	5.13050350220326	4.69291160528579	4.33696559891426	3.65663697628436	3.51230070833696
ENSG00000097033	11.2452486908537	11.2115515414394	12.1414078145427	11.2157028069624	11.0727308735874	11.5813198597397	11.229203104996
ENSG00000183291	10.2631966058109	9.89176800012487	10.7157315136861	10.4677326822046	10.2599111578578	9.87883192133717	9.16167247989026
ENSG00000153936	7.89294851489528	6.28641389541695	7.68655459839544	8.32155198229987	8.01430128260955	8.17577204835957	7.55092344340896
ENSG00000225568	2.52747258896495	4.41126059962802	3.65762523742616	2.67928097903747	3.14177849754872	1.63743986325387	4.1279158850238
ENSG00000143013	9.2606385961722	8.6600792808363	9.20528852004858	9.23380344076545	9.1784682216011	9.53938888386452	9.58968046225211
ENSG00000065243	11.106104300091	10.2642313929896	10.5970588311164	11.3902891500113	11.547922661603	10.9406137343738	11.7202567310386
ENSG00000207234	2.87855725524597	0	2.11101898638035	4.35468608856605	4.65476828368984	1.63743986325387	4.50390308473326
ENSG00000241975	5.88219197918911	3.71880372171819	5.19729939793444	6.46869615952876	6.49078064230945	5.46852523391801	6.67952503505705
ENSG00000137947	8.6852271013134	8.84320748459898	10.1354624120062	9.07803206143499	9.00353135090095	9.65534658418713	9.51808474706971
ENSG00000137944	7.7670928527552	6.55883029519823	6.93284842789501	8.32641896847245	8.45256785197105	6.89752388870145	7.46143711345462
ENSG00000213516	8.9043313620173	8.06965786667644	9.08255885724045	8.67059788005097	8.60533089086898	8.93894073802833	8.78413478160383
ENSG00000117226	8.19618694423229	5.85242736401778	7.99891287624473	8.75965277255676	8.75062272984539	7.5287942382695	8.39920903271495
ENSG00000117228	10.0506015035896	7.45439791385798	10.573678491073	9.50031997289873	9.07188077743438	8.12757909961254	7.92508602388009
ENSG00000234518	6.78932456444327	5.80088446224794	8.44611614684829	4.86333897989	5.300823246423	6.9600164666652	6.30522963547155
ENSG00000162645	11.6639094260861	11.2860767326363	13.2868593365932	10.8929424360145	10.8765008275992	11.5394696804	11.2869461495835
ENSG00000162654	10.8365320288228	7.72714848141846	10.5192368968755	10.3989353135521	9.91337350698121	9.93124461443639	8.98521824423214
ENSG00000154451	10.7685300844933	8.53158238797097	10.8443915937438	9.75076433582055	9.58622187917859	10.4670540518217	9.67330154051583
ENSG00000225492	4.14401582757003	0	4.64787469213644	3.27031744045796	3.02052882301288	2.05890482480417	0
ENSG00000197147	8.15255680992877	8.45861878020003	9.38795820443576	9.51318355726012	9.41636456899254	9.79217226816874	10.4462052386029
ENSG00000231999	5.23021542769131	5.85242736401778	5.19729939793444	4.63131443218978	4.52703367828901	4.98237402963518	5.47175430410685
ENSG00000230735	4.58699099674475	6.39468532854321	7.26414513694348	4.19354868309829	4.80919159114902	6.73547651835367	7.2719868962787
ENSG00000171488	9.42301753482659	10.7366915656027	11.4247433819901	9.63587912580518	9.64124297094022	9.86909433336647	10.3554952707322
ENSG00000272931	2.31363461767247	3.18761300887002	3.45416131789444	4.10568625799139	3.85975436971083	4.32194201456219	2.98920973011426
ENSG00000171492	9.65248489220102	7.62711287906224	8.62053375821661	10.2429382231595	9.92819868755858	8.77827431030175	9.21319107342334
ENSG00000272672	4.43635943476301	0	3.45416131789444	4.80873663814149	4.69495116024669	2.05890482480417	4.97104699371942
ENSG00000162664	9.94295963322292	10.054663975236	10.9205005891438	9.98733029995108	10.0503538746605	11.2207288514395	11.5170353916677
ENSG00000232882	4.84796565750879	0	5.78003182925904	3.91207030110164	4.17593646214101	5.07564192260167	5.68138803602382
ENSG00000122482	10.8195126670242	10.9616550406705	12.0991838159281	10.6062445956461	10.5322070161291	11.7539509864065	11.3264724468669
ENSG00000097046	5.37530578225617	3.18761300887002	3.99456469172968	6.24020076090736	6.40859072937429	4.07326276388756	5.65679018031309
ENSG00000069702	7.39056672535628	4.66294991359728	5.26113905215424	7.68175024014585	7.40007449324635	6.20621484166961	4.8889431722982
ENSG00000189195	3.77697631888484	0	1.80321559338192	4.86333897989	4.17593646214101	3.87993720504894	1.84905688366074
ENSG00000069712	4.88721545208304	4.2667716376633	3.45416131789444	5.89185541497393	5.92512256732836	4.46671360872394	2.98920973011426
ENSG00000174842	6.1795928606126	5.37695411708694	6.47539333497031	7.24097418499898	7.34431853809758	6.91024083863757	7.01566259941357
ENSG00000122484	7.73518046451665	6.98551013427799	8.64466950241082	8.48282468235134	8.4408004236646	8.57765324274738	8.81503163627732
ENSG00000162676	4.80761810241189	2.82441493502978	6.42053392067172	4.56696956045767	5.19271687701898	5.72035364995096	4.93057907059869
ENSG00000067208	10.6728020983768	9.76973032953973	10.4317845008944	10.9149199635535	10.9597694280079	10.8033385631277	11.137176087563
ENSG00000223787	5.06888502984787	1.59824879552092	5.16428799167219	5.94345483044396	6.05430101640249	4.24371680643672	6.06466081336101
ENSG00000229992	5.29001363955669	5.14860253177577	5.80166027810763	5.53621063423022	6.00720408417128	5.56818160163491	6.70374151089645
ENSG00000201317	4.00819014552515	2.3378570285089	4.69486477337447	4.49962036183748	4.43512744608647	5.07564192260167	6.1015827438833
ENSG00000234202	4.00819014552515	2.82441493502978	4.69486477337447	4.19354868309829	4.43512744608647	5.53572172234859	6.04583934967861
ENSG00000122406	12.1800081950098	13.2629069839213	12.7699498758611	12.2558234763286	12.0847360515499	12.829759404346	11.9127092400193
ENSG00000251795	3.8582351010964	5.30477962313168	4.20396899742703	4.69291160528579	4.48181229406492	4.53399259181824	5.15793081578898
ENSG00000207523	3.39659994465825	4.10618459694941	4.78448852620561	4.27636593605377	3.71093363876742	3.23947903556953	4.61021658379842
ENSG00000154511	4.07770084731778	4.87718372591781	2.11101898638035	4.69291160528579	4.98153275333896	2.87448177217153	4.55803890497379
ENSG00000143033	8.70458281220677	8.26299264672416	9.82155070816575	9.23121064674711	9.34713186724502	9.38623640207289	10.3688082841529
ENSG00000117500	11.4891762338059	11.1677160282959	12.6962669165249	11.0519883032369	10.8219775612191	11.4072233895123	11.166876335061
ENSG00000122483	8.57536649088395	8.55510598583127	9.2803835982368	8.43405413185157	8.54889552882725	8.44847511115851	8.33863878663488
ENSG00000223745	9.07551559816145	7.42064642058157	7.26414513694348	8.97021198081346	9.15705241318649	8.44410922320851	8.69029699759944
ENSG00000117505	10.6307807995911	10.2059811266458	10.8835818772627	11.0483106305827	10.8405684831477	11.0168229329006	10.8133229516957
ENSG00000137942	4.48833717165801	2.3378570285089	6.52824287784407	5.35754171045242	4.77210756444987	5.95937243230624	7.78456817034425
ENSG00000137936	4.48833717165801	11.3889283788279	10.1732863368525	3.91207030110164	2.58020695810024	8.73246473088051	5.65679018031309
ENSG00000224093	3.02651875438447	4.2667716376633	2.93355869889295	2.085159318413	3.02052882301288	2.05890482480417	5.52708691895972
ENSG00000260464	2.52747258896495	5.37695411708694	3.21721640213654	3.56202644573208	3.02052882301288	3.23947903556953	2.63349908374298
ENSG00000067334	10.1232909433471	10.9733428416249	10.6494377647432	9.44097083340525	9.36124674994305	10.1877790882416	9.44813513873205
ENSG00000023909	6.57769889728329	7.33264258999079	7.94161857148912	6.6348496502292	6.66272620711263	7.45259902187933	6.60433677238724
ENSG00000137962	6.80989678112999	3.47751911661863	4.06779570150376	6.93168536771856	6.87872847582069	5.77699565808605	2.98920973011426
ENSG00000117528	9.11944244141769	8.01415983163095	9.7648721530954	9.53437122046721	9.28596466052868	9.35634432231724	10.5566946810268
ENSG00000117525	5.67352468514164	5.95029741048648	8.5456049359819	3.56202644573208	3.25362320518174	5.02976154714248	4.2644254661366
ENSG00000172339	4.43635943476301	4.87718372591781	3.65762523742616	5.06316618343512	4.77210756444987	3.39233067961497	3.39821835481663
ENSG00000122481	4.43635943476301	4.2667716376633	4.82729547021179	5.60191099361548	5.78322975496594	5.28541649545005	5.60629937335222
ENSG00000228502	3.69086607913953	2.3378570285089	3.65762523742616	2.90427965831286	2.18818721642471	3.87993720504894	2.41622991878119
ENSG00000137970	4.00819014552515	4.41126059962802	4.49695825262468	3.42353226338762	3.63034018261103	4.32194201456219	2.98920973011426
ENSG00000117569	9.24183509664554	9.79958072696205	11.2380721873109	9.63391740945082	9.58087065785308	10.0552217433601	11.3847391874225
ENSG00000188641	12.6291941330076	10.4196811801418	11.4944645818945	12.9099078658809	12.93111413885	11.3523646570544	11.8661948876144
ENSG00000232542	6.01215366690413	0	4.20396899742703	6.39647864772677	6.29553353202915	4.8826572049622	5.49968587121579
ENSG00000156869	6.34378189757991	6.67789978807748	7.52691358650783	6.95701311859373	6.76063627385602	8.27251479679078	8.59317298475581
ENSG00000162688	7.5085322807316	4.97344299326954	6.94261588455501	8.50445956348183	8.36499615207793	7.19641176518763	6.91554138853833
ENSG00000117620	8.9924609938436	8.35521305360624	8.78157321269874	9.00097915463692	9.02536355219478	9.33528090817985	8.84528065174639
ENSG00000212248	2.06249186112524	0	3.91741677817488	3.0988763445592	3.45424297564438	3.06849264354608	3.13880429617032
ENSG00000261254	2.71366837669273	2.3378570285089	1.80321559338192	4.49962036183748	4.57088056931403	3.06849264354608	3.27433421141826
ENSG00000156875	10.065649205535	9.69757936758667	10.9321913381846	10.1512803189079	9.9480779602713	10.6238961330137	10.4281504695667
ENSG00000156876	5.19936041834003	4.66294991359728	4.69486477337447	6.24020076090736	6.11479671797727	5.24583103298425	4.1279158850238
ENSG00000122435	5.82269834678899	2.3378570285089	4.98685043944224	7.25124800424957	7.09687124647712	5.24583103298425	5.65679018031309
ENSG00000122477	4.48833717165801	0	4.44292819458115	4.10568625799139	4.05764343471017	4.71883234332833	4.44765640149965
ENSG00000137992	7.10448424849158	6.46260033370346	6.79946001610653	8.0778156280057	7.84606526731169	6.55289702595374	6.9961865154407
ENSG00000224616	3.39659994465825	2.3378570285089	3.34054781363769	3.27031744045796	2.88814603455711	3.06849264354608	3.39821835481663
ENSG00000137996	8.60803767756288	8.8994251601736	8.75410319455739	9.18907940463803	9.42684164287574	9.2553055301663	9.26903208227916
ENSG00000207750	3.39659994465825	0	3.08234782447163	5.31899045793984	4.80919159114902	3.53052810100398	3.97712668115064
ENSG00000079335	8.6990790564958	8.11256864195348	9.26489568046313	9.04001996179329	9.17492092402803	9.92028477635366	11.229203104996
ENSG00000162694	4.00819014552515	0	1.80321559338192	5.39508956267286	5.16437534212712	3.77260308406909	4.50390308473326
ENSG00000162695	9.79731421648767	8.70983399379623	9.82022677612574	10.6774948402262	10.6170006322093	10.2516285456728	10.5756815571879
ENSG00000117543	5.90149020610994	6.08567826021284	5.78003182925904	6.50349302084445	6.11479671797727	5.72035364995096	5.22639460102414
ENSG00000269175	3.9351600549912	0	3.83590915873503	5.15357600954391	4.88061691203016	2.87448177217153	6.1015827438833
ENSG00000235795	2.06249186112524	0	3.34054781363769	3.56202644573208	3.85975436971083	3.53052810100398	4.7092305767412
ENSG00000233184	4.5385071835112	0	3.559477134893	4.0121238580642	4.17593646214101	3.23947903556953	5.41421454850831
ENSG00000170989	5.86263210543627	9.35747521791911	9.49305884572273	5.60191099361548	5.16437534212712	8.68884771527251	5.15793081578898
ENSG00000185946	9.59585916249188	9.91316460358573	9.33331826431541	9.65147756166694	10.0396665161164	9.84114213466933	9.7853371023514
ENSG00000240038	7.68594796680228	6.55883029519823	6.93284842789501	7.38789039882138	7.58784559337619	7.06610373339848	7.67859263163773
ENSG00000198890	6.74727859488482	5.30477962313168	5.4372786629689	6.33983958163003	6.28240676102882	5.39804537877541	5.08605547994802
ENSG00000134215	10.3261402948057	11.3446192494635	12.6998708607688	10.6793982262693	10.6809205173658	10.8050419161877	10.5119669051287
ENSG00000230489	2.52747258896495	6.39468532854321	4.82729547021179	1.0573276937661	1.64818696484463	3.06849264354608	0
ENSG00000226822	5.31900825339626	4.97344299326954	6.17750338550684	5.35754171045242	6.15855985334766	4.8826572049622	4.61021658379842
ENSG00000085491	9.66241733928651	10.12184154008	10.2637226492089	10.1052963349542	9.82899449964486	9.50835964624785	9.29516665839782
ENSG00000260879	3.59928809165048	5.634190616605	4.20396899742703	3.56202644573208	3.85975436971083	3.23947903556953	2.16033764350512
ENSG00000162636	10.2936429230881	10.9454281247089	10.4711206158105	10.4275288141287	10.4509433001654	11.5141807523629	11.1113844817781
ENSG00000162639	6.50386185197481	4.2667716376633	5.02412680010957	7.14506104684761	6.83444489223746	6.39899563171808	4.44765640149965
ENSG00000134186	10.3735537232816	10.5619351355923	10.4343828521795	10.410440807736	10.5112616545396	10.3079743636366	10.6507826040878
ENSG00000143107	2.31363461767247	0	3.08234782447163	1.0573276937661	2.88814603455711	2.65026627927602	4.66057284562319
ENSG00000116266	9.77001324448818	9.83844414640645	10.6162571147613	10.5748897705028	10.5411897481865	10.1851653849269	10.5781397854551
ENSG00000121957	5.92053369384829	4.2667716376633	6.24220556828899	6.68118046928943	6.45612811339245	6.03098803180369	7.38861440927288
ENSG00000121940	8.90910645451135	7.15929513062184	7.41910153715209	9.18640489856959	9.34397638417708	8.66278187749501	8.60607868563493
ENSG00000085433	8.49824138234374	7.99134871453742	8.97720666570283	8.63180559836436	8.33987270291208	9.14396465898237	10.1272239913179
ENSG00000237349	2.31363461767247	0	2.58013212780751	2.085159318413	2.88814603455711	4.07326276388756	4.61021658379842
ENSG00000244716	6.34378189757991	7.36849083699411	7.21663293618191	6.55416354686084	5.94191672466445	7.00813186587994	6.13758328750617
ENSG00000197780	8.99919461070151	10.4638492041325	9.67983350375676	7.77726702912348	7.5717502394308	9.19162223862597	8.23859286604003
ENSG00000273382	5.13559722390137	5.69192192306556	4.44292819458115	5.39508956267286	5.10596522064134	4.7755329522519	3.89537809682773
ENSG00000215717	10.298200459079	10.9290166160203	11.4587494149867	10.3387860568751	9.99409576855243	11.1420507724012	10.2779784452222
ENSG00000270066	11.0253919970914	12.7808088063715	10.4895610259346	9.40920836741812	9.5942116779801	11.0299919918679	10.3059317027957
ENSG00000116299	3.39659994465825	3.18761300887002	2.93355869889295	2.41258988407027	3.35741753305583	3.23947903556953	2.82228974443749
ENSG00000031698	9.57647900983307	9.62903729090148	8.95083146212794	9.95312411137398	9.85138999477868	9.44422430546021	10.2617585664758
ENSG00000143126	7.12925087505897	7.07501778865465	6.66432473128414	7.42466651735745	7.23954229455248	7.08865557708429	6.66726263856125
ENSG00000134222	7.01871648921859	5.06367942570183	4.26752059213666	7.3114003322688	7.33798829580238	6.20621484166961	7.81823129690877
ENSG00000221986	3.59928809165048	0	2.36455950793486	1.0573276937661	1.27675269354415	2.3846756967756	7.33535909869271
ENSG00000134243	11.8917773719722	10.8724026670962	11.4256142578686	11.4494866942593	11.2521867001966	11.5838026020144	11.6951862673917
ENSG00000143106	8.66278356096082	8.02543154665148	8.01288785664205	8.72321224168243	8.81585033732886	8.36779335439507	8.1836912061408
ENSG00000162650	8.099232887793	8.71680377905063	8.4218805201258	7.22020441874788	7.16996968111112	8.82603338632276	6.76256187113569
ENSG00000174151	8.47910125067737	7.96817111801115	7.58419494620465	8.74518682428132	8.63661539617377	9.20973874385758	8.91435374659426
ENSG00000181754	3.77697631888484	4.54258695386237	1.80321559338192	2.67928097903747	3.45424297564438	0	1.84905688366074
ENSG00000065135	10.9959568227676	10.3017980032667	11.1300203392247	10.4173003172205	10.226888457068	10.2788512434992	9.35945700180517
ENSG00000225113	7.36993276702052	8.18472195641608	5.78003182925904	5.23865266772122	5.92512256732836	6.87174867736671	4.44765640149965
ENSG00000207709	4.32642440952544	4.54258695386237	2.93355869889295	4.42897248668723	3.35741753305583	3.97983584168637	3.51230070833696
ENSG00000116337	14.068527605365	12.9567032638023	11.8495259011154	12.2150714660264	12.3659525238262	13.2593165658707	12.4659278570026
ENSG00000168765	6.60149469796644	7.2194218400429	5.88507045799159	6.57066581348149	6.91320197281668	6.73547651835367	7.25569913341962
ENSG00000213366	6.01215366690413	6.89007976595666	5.09590885028622	5.63367220648624	5.89093612963614	6.43464271053256	7.33535909869271
ENSG00000134184	0.843395306370566	6.64904097498125	6.72217687412481	0	0.775231766808725	6.97219659144678	5.01041068592179
ENSG00000134202	3.28346946000656	1.59824879552092	4.98685043944224	2.41258988407027	3.54497674419106	2.3846756967756	5.22639460102414
ENSG00000261055	4.5385071835112	6.20943785841715	6.22630002487491	2.41258988407027	2.39747163545167	3.97983584168637	4.93057907059869
ENSG00000184371	7.41090972568373	12.3324793347121	11.4005859354982	3.42353226338762	3.71093363876742	8.75731201970735	7.13622557259807
ENSG00000168710	10.233998101184	9.72203281655574	9.83209865256801	10.604242138522	10.3076649167402	9.47450926273146	10.5102516087303
ENSG00000143093	9.79988756554673	9.36192807798488	9.67837284960544	10.2130279775236	10.2565587910909	10.5414877510037	10.1383718431073
ENSG00000258634	6.63646828647492	6.55883029519823	6.61631241234671	7.0773826637146	6.60062317872674	7.5287942382695	7.71478969445307
ENSG00000116396	6.80989678112999	7.03095800415742	5.73577719027462	6.21941977646647	6.15855985334766	5.80450397848196	6.41197222952541
ENSG00000227963	3.9351600549912	3.92545733628	2.58013212780751	5.06316618343512	4.28526085098457	3.39233067961497	2.41622991878119
ENSG00000162775	9.87868424594777	10.1060018957907	10.2646963216056	10.086771216449	10.2096559270702	10.3470822982021	10.6193012701366
ENSG00000168679	2.71366837669273	0	3.45416131789444	3.68838235732035	3.85975436971083	2.65026627927602	3.27433421141826
ENSG00000273373	5.78162767853193	5.06367942570183	5.86466564213961	6.9819038797432	7.35689629984119	7.29667589536822	7.99052497759789
ENSG00000224699	4.07770084731778	3.18761300887002	4.13748839636131	4.75198616883089	5.62584377668664	4.53399259181824	5.68138803602382
ENSG00000134248	9.29205262286027	10.084608164109	9.5356287355171	9.22601103748475	9.10021035425471	9.43325230918351	9.23827650356948
ENSG00000259834	5.62790857511648	3.18761300887002	4.44292819458115	6.57066581348149	6.82542269296054	5.36147075495439	6.44107369323768
ENSG00000177272	7.93100914596845	8.03661587852153	7.13379416662759	8.11204148938598	8.25506166732881	7.59330194178315	8.07185132470948
ENSG00000143119	12.1477958110535	11.6146685713132	12.8853848285396	12.2826787557311	11.9318243833146	11.9336438376702	12.1895201801308
ENSG00000261654	2.52747258896495	3.47751911661863	2.7676411147326	4.35468608856605	4.73404509862801	2.05890482480417	2.82228974443749
ENSG00000232811	4.58699099674475	6.16935279751104	6.89310357209209	4.35468608856605	4.38688123547116	4.24371680643672	7.81267504051871
ENSG00000121931	6.1795928606126	7.00841302452502	7.15074681854286	7.51270328041041	7.05116564703731	5.56818160163491	5.98785525421123
ENSG00000273010	4.38243881584995	6.96223778589868	5.5178898648864	4.86333897989	4.52703367828901	3.23947903556953	4.80188335580512
ENSG00000156171	9.31921399065221	8.94168405792313	9.28614896791909	9.99346340175298	9.68054879262355	8.94204032720541	9.58153562784607
ENSG00000134255	9.3529001931229	8.11256864195348	9.18073854896625	10.2709792063569	10.2806887856623	9.09746155536007	10.2678624108092
ENSG00000273221	2.52747258896495	0	2.7676411147326	4.96670956938878	4.17593646214101	1.03953588835187	2.63349908374298
ENSG00000162777	7.8686404219795	8.2534379069476	6.99987137167747	9.25947827459622	8.92546279276446	6.56902617819534	7.02530292443521
ENSG00000064886	4.00819014552515	5.228803390048	5.59423424097207	5.60191099361548	5.76447018094422	4.46671360872394	6.11969530601595
ENSG00000085465	4.962649881597	6.12812207138205	7.06391838694317	5.31899045793984	5.42547385521944	6.0075089610779	7.94553905292173
ENSG00000260948	4.72337138775065	5.634190616605	6.55395894025316	4.91594990284807	5.37689821473237	5.83149758792892	7.42548519520039
ENSG00000243960	2.71366837669273	4.66294991359728	4.32839041862219	4.63131443218978	3.35741753305583	3.87993720504894	5.01041068592179
ENSG00000116455	8.30887878251531	8.39051158342707	7.38368834983243	7.6968630664651	8.26510586982081	8.00251710235274	8.67506739455678
ENSG00000116459	9.87868424594777	9.83524521619521	10.513514195639	10.3375812255774	10.0435619947498	9.97880452949564	9.45171435103017
ENSG00000143110	11.1298209989116	10.7037437018462	10.3423809335284	11.3644938605374	10.9913729094878	10.3794531795682	9.20473138847831
ENSG00000121933	4.92542564221765	5.57405246995406	3.99456469172968	4.56696956045767	4.52703367828901	4.53399259181824	3.61801924029512
ENSG00000116473	10.9092392964182	10.37191215453	11.094866593473	10.8163028861943	10.6429094087063	10.6248608577739	10.4886365349161
ENSG00000231346	4.58699099674475	2.3378570285089	3.65762523742616	3.56202644573208	3.99464891084152	4.59827337071226	4.05449043122323
ENSG00000197852	8.98569580115202	9.50568560447695	8.46657034437636	8.74518682428132	8.94225301301799	7.98459128685766	8.81225001465916
ENSG00000064703	7.08773376147653	8.24381946552907	7.94648096753966	7.77726702912348	7.85938641822858	8.38155755953549	9.01697259590226
ENSG00000143079	6.50386185197481	6.24843920504504	8.10274711628745	7.51270328041041	7.4595986951853	7.61676761008353	9.50091272441385
ENSG00000134245	4.76610961001424	4.2667716376633	4.20396899742703	4.69291160528579	4.91504584779566	5.02976154714248	8.62522331926203
ENSG00000007341	8.29435216734951	8.60854718041211	7.80372770160417	8.08357662199188	8.00234205761337	7.74297891867597	7.85653721833191
ENSG00000116489	12.6144684700227	11.888315312169	13.0328355554015	12.6691917463911	12.4244463274117	12.4649432300794	12.0659404396494
ENSG00000238975	6.90857496453062	6.49539537033575	7.88702182049122	6.61906940064924	6.86117781736555	7.81912922292501	7.3584239303145
ENSG00000155363	10.2167689328674	10.76722617948	10.5768178487431	9.21029881585958	9.52065872536624	10.0175190392587	10.7442251388865
ENSG00000155366	9.61790209374064	9.51371189781633	8.41488061252252	8.6858273678106	8.1028366455805	8.62856141492357	9.77822778308099
ENSG00000155367	4.26814701610236	3.47751911661863	2.58013212780751	1.66090413924776	2.88814603455711	4.24371680643672	6.57837727134883
ENSG00000155380	7.45729005474287	5.90219214593163	7.65125104383015	7.60371608011078	7.59317105339728	7.9231769809213	8.1836912061408
ENSG00000226419	4.38243881584995	4.2667716376633	3.74951942146031	5.60191099361548	5.78322975496594	3.87993720504894	5.12244070691391
ENSG00000198799	8.96291325919113	8.04771417168809	8.67721032873327	9.82829751497022	9.97586440438104	8.82938500565614	9.66098590535098
ENSG00000081026	5.40265159356891	3.71880372171819	4.74037249381492	5.78276653947435	6.22867166761495	4.07326276388756	5.15793081578898
ENSG00000116793	8.26112240501024	8.56286271487891	9.22142610768784	8.59194135007717	8.61321584647169	9.98482864814404	9.63603467654993
ENSG00000232450	2.31363461767247	4.10618459694941	3.74951942146031	2.90427965831286	3.54497674419106	2.65026627927602	4.1977846616995
ENSG00000081019	8.9043313620173	9.25107216049463	9.59257182774648	9.60816934591685	9.35655711628441	9.83114590939242	10.2182929000531
ENSG00000134242	9.26250553683922	9.34403357684615	8.97244690044937	9.92932784881373	9.85914700112306	9.23016852906751	8.58992843966202
ENSG00000188761	4.20741605952151	4.77403976778885	3.74951942146031	4.35468608856605	4.65476828368984	4.8826572049622	4.84606987040974
ENSG00000134262	8.57235936543158	7.68512247366624	8.12864860516375	8.87376609747125	9.14803447514825	8.47439657119237	8.14883682437424
ENSG00000118655	6.73657280576639	6.78788698201087	6.55395894025316	7.71923955211518	7.41819103338725	6.94773263353757	6.70374151089645
ENSG00000235527	5.73935346350372	6.08567826021284	7.64528220538021	7.46052842237274	6.61116111125942	5.85799539478879	5.65679018031309
ENSG00000163349	12.020915835119	12.0632482733674	12.6639733889095	12.4165088461309	12.2812628406812	12.1664567290456	12.6776887908086
ENSG00000116774	1.75821945050536	0	3.74951942146031	3.0988763445592	3.25362320518174	3.53052810100398	3.51230070833696
ENSG00000197323	10.7177223945598	10.3338850290925	11.309636526423	11.2084709905955	11.2846417901057	11.0737471231089	11.7716353535089
ENSG00000116752	7.70803674625143	8.66729301792188	8.29800074304698	7.63543801193624	7.55547329062807	8.22240702456327	7.79587671287414
ENSG00000175984	3.8582351010964	4.97344299326954	5.59423424097207	3.0988763445592	2.74237703473556	5.53572172234859	5.49968587121579
ENSG00000213281	10.9163717761422	11.4382563421491	12.0301475874544	10.3507793510641	9.98905456751625	11.2447748806125	9.49051053737984
ENSG00000009307	13.0098082422572	13.3137845401283	13.8977386799836	12.77422557906	12.5411524385076	13.5351347427264	12.6108306690042
ENSG00000052723	8.17255240326575	7.43762086594757	7.480733868295	9.0311038597423	8.74823773706745	8.50406113116801	8.75546073076591
ENSG00000134198	5.97620083107363	4.10618459694941	4.74037249381492	7.39717268902525	6.79801253986931	4.53399259181824	4.1977846616995
ENSG00000233730	3.02651875438447	1.59824879552092	3.65762523742616	3.80455730830565	2.39747163545167	2.65026627927602	2.82228974443749
ENSG00000173218	5.42948870135878	5.99685027579024	5.75807419187533	6.57066581348149	6.35943344131911	6.20621484166961	4.75630063197813
ENSG00000163393	9.30116334845412	9.59539720308714	9.73004647085474	10.362673765021	10.4914344301857	10.1058504145792	9.95381895525646
ENSG00000173212	3.77697631888484	2.3378570285089	1.41141623664498	1.0573276937661	2.39747163545167	3.06849264354608	1.84905688366074
ENSG00000163399	12.7423841439018	12.6991409867712	12.8498171177505	12.0342772299118	11.8565982593535	12.594442936693	12.1410184806593
ENSG00000269279	3.69086607913953	2.3378570285089	2.93355869889295	1.0573276937661	1.64818696484463	2.65026627927602	1.45159216230282
ENSG00000203865	3.39659994465825	1.59824879552092	1.41141623664498	2.41258988407027	3.25362320518174	1.63743986325387	2.41622991878119
ENSG00000233154	3.16070707689657	0	1.80321559338192	4.27636593605377	4.38688123547116	1.03953588835187	2.63349908374298
ENSG00000224950	4.38243881584995	3.92545733628	5.22957231153101	5.69517090817399	6.2691594548073	2.87448177217153	4.1977846616995
ENSG00000116815	9.54154003376589	10.0601548051954	10.9198826544726	9.32660114500617	9.37367842027886	10.0219199748454	9.2547610309313
ENSG00000177173	9.29934580031491	10.6132621790168	9.90260027533212	7.321186328581	7.59317105339728	9.86420078121859	8.53699809836773
ENSG00000264419	4.962649881597	2.82441493502978	4.90927758087771	3.56202644573208	3.63034018261103	5.32394473428681	5.29175607060064
ENSG00000143061	3.69086607913953	5.85242736401778	4.86886878324354	4.96670956938878	4.88061691203016	4.32194201456219	4.8889431722982
ENSG00000116824	5.34743160900742	4.66294991359728	2.36455950793486	4.96670956938878	4.38688123547116	3.77260308406909	1.45159216230282
ENSG00000134247	6.28621554841451	5.74743165100522	7.66311514336689	6.04142677877375	6.2691594548073	6.87174867736671	4.38912753927669
ENSG00000134256	9.60912529499119	8.42496704771801	8.1540932602514	9.24155398108818	9.11138823584602	8.99373929811673	6.48365397340979
ENSG00000116830	8.50456541007541	7.03095800415742	7.69235543856842	8.44751953264918	8.51842890162	7.82585673714226	8.3692417597046
ENSG00000134253	3.02651875438447	3.71880372171819	2.36455950793486	3.56202644573208	3.7872620982143	2.87448177217153	3.39821835481663
ENSG00000198162	10.3958383606439	10.7638651842683	11.0816671200357	10.659286314711	10.4691602576518	10.7784112415624	10.5076748341729
ENSG00000183508	6.22625638073179	7.74088943369902	6.31920466470295	5.19674137596824	5.04509010912583	6.16436273185934	5.44327126829131
ENSG00000196505	10.3027436429438	9.01136688680627	9.98052345446433	11.0505183589846	10.9787127468974	10.1480674603371	11.3443934362395
ENSG00000065183	7.38372147745068	7.11777177164864	7.11663993847021	7.88675712365608	7.67078027994565	7.30632946459434	7.153911008944
ENSG00000116874	7.23951863771217	7.05315608763134	7.32515457371116	7.41556000153341	7.48846446400623	6.92284667100312	6.73932070837895
ENSG00000223575	3.16070707689657	0	3.91741677817488	3.42353226338762	3.25362320518174	3.23947903556953	3.13880429617032
ENSG00000236804	4.20741605952151	3.47751911661863	3.99456469172968	2.90427965831286	3.92877767610173	3.87993720504894	2.63349908374298
ENSG00000231365	6.14762366665857	5.44568927656727	5.82296926318515	6.76960405103819	6.89606819078846	5.12010807646623	5.90672969071449
ENSG00000260941	2.31363461767247	3.47751911661863	2.11101898638035	4.35468608856605	4.17593646214101	2.05890482480417	3.80871760677765
ENSG00000143067	8.37595043434686	9.61791085716425	10.0408764071899	9.12348174279126	8.96502507291172	9.87072183575516	9.94495757382452
ENSG00000092621	3.39659994465825	3.71880372171819	3.21721640213654	3.0988763445592	1.27675269354415	4.24371680643672	2.98920973011426
ENSG00000134249	0	0	2.36455950793486	3.68838235732035	2.74237703473556	0	2.82228974443749
ENSG00000261662	7.10448424849158	3.47751911661863	6.22630002487491	7.61966423186838	7.4595986951853	6.53658551107092	6.90513624262699
ENSG00000134250	14.5319930053231	12.9152671858255	13.6646923397204	14.540164949827	14.6437483679295	14.2180438497772	13.8606979886349
ENSG00000273131	6.39913910426673	6.28641389541695	7.51386952366741	7.01845288843759	7.16996968111112	7.57744340360817	7.49651485136741
ENSG00000236933	3.16070707689657	6.16935279751104	5.75807419187533	3.0988763445592	3.54497674419106	6.56902617819534	3.97712668115064
ENSG00000188610	5.03433527380244	6.32341459670417	7.39084087055697	4.42897248668723	4.80919159114902	5.20512868499163	4.44765640149965
ENSG00000198019	6.42604102505158	5.634190616605	6.99048519881172	6.04142677877375	5.85591989942816	5.36147075495439	4.1279158850238
ENSG00000171943	7.3973796474919	6.42904243238721	8.63566585011502	7.65877995276942	7.77286404231439	7.46988246147142	8.56700998646431
ENSG00000269996	8.16058833416228	7.78134406533744	9.36453453223502	8.53841438545502	8.36810604286875	7.49542548682776	9.28717555743988
ENSG00000227082	2.87855725524597	7.11777177164864	5.38092154114533	2.41258988407027	3.85975436971083	4.07326276388756	4.38912753927669
ENSG00000231752	3.02651875438447	4.87718372591781	4.26752059213666	4.75198616883089	4.88061691203016	3.97983584168637	3.51230070833696
ENSG00000230850	0	3.71880372171819	3.83590915873503	4.69291160528579	4.88061691203016	5.07564192260167	4.44765640149965
ENSG00000223804	6.25654743399132	6.61959308374914	6.14403055772711	6.48619949733735	6.42062272786136	6.48651435071347	6.96647035541214
ENSG00000215784	3.50150062063204	5.06367942570183	6.00178645424474	3.68838235732035	3.35741753305583	3.87993720504894	3.13880429617032
ENSG00000196369	9.60618778969292	10.3293446301348	10.3488227597284	9.50247188443815	9.79010565739557	9.37481262652846	10.1799650590539
ENSG00000235398	2.71366837669273	3.18761300887002	3.99456469172968	2.90427965831286	2.88814603455711	2.3846756967756	3.13880429617032
ENSG00000231360	3.16070707689657	4.10618459694941	4.32839041862219	3.27031744045796	2.39747163545167	3.06849264354608	2.98920973011426
ENSG00000236943	4.00819014552515	4.97344299326954	5.40937527483834	5.19674137596824	5.35198297114132	5.93468816486192	5.1925687930254
ENSG00000201699	4.26814701610236	7.35067805578218	6.33412333895094	5.91788579843229	5.37689821473237	3.97983584168637	5.29175607060064
ENSG00000225241	8.17651847933799	9.4271225186245	9.17660596219554	10.1277746926483	10.4458010589944	8.83939339718024	10.1483317865848
ENSG00000168614	9.62952204631733	8.30983959248322	9.1388701166414	10.1891795931918	10.5091502958509	8.74316601220388	10.40063746102
ENSG00000178104	9.54154003376589	9.77974924409023	9.61717592199162	10.685093363495	10.8895451481468	10.1426890167444	10.9397721037206
ENSG00000268172	5.71774257115249	4.77403976778885	6.42053392067172	6.68118046928943	6.91320197281668	5.24583103298425	6.73932070837895
ENSG00000272755	4.92542564221765	0	3.91741677817488	4.86333897989	5.13546586614065	2.87448177217153	3.51230070833696
ENSG00000223380	9.09030698639257	9.07241469896687	9.49803534953371	9.8920604418874	9.61661206530564	9.31390540508553	9.20260869352212
ENSG00000177144	2.52747258896495	1.59824879552092	3.45416131789444	2.41258988407027	2.39747163545167	2.05890482480417	1.45159216230282
ENSG00000213240	11.2728339948615	10.0491521675686	11.3501054637843	12.4159381513291	12.6156574669611	10.7592093236795	12.5011138061133
ENSG00000163386	11.7612006618382	10.5638690611856	11.1396056632839	11.658840199763	11.9477618693269	11.2391158830476	11.9690536144056
ENSG00000201558	7.08773376147653	6.39468532854321	6.77779830735889	8.65906932421217	7.73963229715164	6.32494505256258	6.83011997799098
ENSG00000117289	14.3626136288775	14.5813499791736	15.0038408990342	14.7928745269356	14.4464410146252	15.3574807465653	14.5402262067068
ENSG00000121851	7.43759506193516	6.20943785841715	5.86466564213961	6.68118046928943	6.82542269296054	6.63179786200632	5.86438949997372
ENSG00000181039	1.75821945050536	4.66294991359728	2.36455950793486	2.90427965831286	3.25362320518174	2.05890482480417	5.25944545529963
ENSG00000234222	3.28346946000656	5.06367942570183	4.13748839636131	4.80873663814149	3.92877767610173	3.87993720504894	3.89537809682773
ENSG00000152022	9.29752595948829	7.71327539387474	7.480733868295	9.53857166751987	9.11509503324361	8.27251479679078	8.23444304598332
ENSG00000131795	9.8491716764278	9.55318692013842	9.95902958987395	10.0621814886282	9.82673570981112	9.46592109413555	9.56675803791672
ENSG00000131779	7.44418997878095	6.16935279751104	6.71079054813194	8.25163181823429	8.01826576170716	8.00844321745436	8.01492403701233
ENSG00000143127	3.28346946000656	2.82441493502978	2.36455950793486	4.75198616883089	5.01366140218408	3.39233067961497	4.2644254661366
ENSG00000131788	8.54500939701365	8.5858857709604	8.83499220414801	9.17565701612622	9.39059891654037	9.71091670939374	9.86131121878682
ENSG00000186364	5.4558356869199	5.634190616605	5.35189531514298	5.91788579843229	6.20103445575336	6.41692926732276	5.25944545529963
ENSG00000186141	8.85569049356693	9.08862534168007	9.00077275082051	9.09524391767673	8.89344454135566	9.29947706855423	8.166369269517
ENSG00000121848	9.55226349014483	9.99857472547111	9.88117443193743	9.72703601478303	9.73094169737889	10.029225164892	10.306920085254
ENSG00000117281	4.32642440952544	0	3.21721640213654	3.91207030110164	4.11800203082925	2.05890482480417	2.63349908374298
ENSG00000117262	6.64794024793431	5.95029741048648	6.85223268969898	6.82567892375686	6.93013465602291	7.57744340360817	7.86192740069919
ENSG00000207418	4.48833717165801	5.06367942570183	3.21721640213654	1.0573276937661	3.25362320518174	3.39233067961497	2.63349908374298
ENSG00000152042	5.60454799494711	4.77403976778885	5.06046422335979	5.15357600954391	5.68689303038228	5.24583103298425	5.63176564744481
ENSG00000232637	6.52889644326085	6.64904097498125	7.98006646491069	7.34056140541658	7.84606526731169	5.77699565808605	8.01007712472751
ENSG00000186275	8.04819770599258	8.39051158342707	8.06747216259507	8.33126959087183	8.42595486603071	9.01744169576976	8.93751342249977
ENSG00000227242	2.87855725524597	2.82441493502978	1.80321559338192	2.67928097903747	3.35741753305583	1.03953588835187	2.98920973011426
ENSG00000131791	7.74054845811796	6.70619262950823	8.14988352660598	9.05475876312906	9.01349605399839	9.01155250372363	10.0288191818275
ENSG00000237188	4.14401582757003	2.3378570285089	3.21721640213654	3.68838235732035	4.57088056931403	3.65663697628436	4.05449043122323
ENSG00000131781	7.97266040975443	7.03095800415742	5.69012196495273	8.32641896847245	8.36187954308465	6.94773263353757	6.77404354215773
ENSG00000271721	4.32642440952544	2.82441493502978	3.99456469172968	5.43168492472469	5.04509010912583	4.07326276388756	4.55803890497379
ENSG00000180867	4.32642440952544	2.3378570285089	4.38679567446152	4.86333897989	4.52703367828901	4.07326276388756	4.1279158850238
ENSG00000226015	4.99893777460154	1.59824879552092	3.21721640213654	5.56943478105997	5.95851763162702	4.8826572049622	4.8889431722982
ENSG00000131778	8.65995340897928	8.84320748459898	9.31651443235914	9.0751433484083	9.18729849300649	9.33528090817985	10.0654902400784
ENSG00000116128	7.63497585219514	9.37520478514151	9.78943611391515	6.96951217841885	6.93013465602291	8.86574789172852	8.80667063002466
ENSG00000162836	4.84796565750879	4.54258695386237	2.11101898638035	5.23865266772122	6.00720408417128	2.3846756967756	3.51230070833696
ENSG00000188092	4.84796565750879	3.71880372171819	5.38092154114533	4.91594990284807	4.88061691203016	5.56818160163491	6.24048958539676
ENSG00000206585	2.52747258896495	4.77403976778885	2.11101898638035	2.90427965831286	2.39747163545167	2.3846756967756	3.51230070833696
ENSG00000203836	4.5385071835112	3.18761300887002	4.26752059213666	5.23865266772122	5.300823246423	5.46852523391801	5.90672969071449
ENSG00000199879	4.80761810241189	7.05315608763134	4.32839041862219	6.32045474299892	6.06966441788357	3.06849264354608	5.49968587121579
ENSG00000202408	7.03628280436617	6.91453564667503	7.93673973199646	7.92576443383329	7.08935349463972	6.0075089610779	7.13622557259807
ENSG00000215863	2.71366837669273	0	4.32839041862219	2.41258988407027	0.775231766808725	3.97983584168637	2.41622991878119
ENSG00000212456	9.50730927495655	10.2594660332554	10.7488141493349	10.5417924599987	9.76437192171055	9.36791468790903	9.89324961264374
ENSG00000122497	10.6558560926469	9.62533800590395	9.60646322450824	10.5260127846634	10.8293298820916	9.50626710752767	9.93476318165011
ENSG00000223612	3.02651875438447	3.71880372171819	4.06779570150376	1.66090413924776	2.39747163545167	3.06849264354608	1.84905688366074
ENSG00000207501	8.72909314078965	9.68341759231282	9.44576447657412	11.175808700959	10.2320183319595	7.97856617492907	9.45171435103017
ENSG00000203832	8.23853625160458	6.04194781204247	6.27350005834635	7.67413404196743	7.9658578068726	6.87174867736671	7.17138226926789
ENSG00000243452	9.60029477460371	8.71680377905063	7.98952044498642	8.86710121286453	9.10953125948768	8.50406113116801	8.89870480275237
ENSG00000207205	6.692937067001	8.30059110993435	8.26723888552686	8.74518682428132	8.06500873005165	7.96033837606285	8.42128293328693
ENSG00000203827	8.12408905473801	6.91453564667503	6.57922462962528	7.3309063921315	7.55547329062807	7.39042239772464	7.48258593385945
ENSG00000206737	8.94442459039058	9.74948132151446	10.0363224591569	10.8521815157329	9.98500888503629	8.6362364173389	9.50952428485412
ENSG00000223779	4.00819014552515	5.90219214593163	4.98685043944224	3.56202644573208	3.99464891084152	3.97983584168637	4.50390308473326
ENSG00000226067	5.31900825339626	0	3.45416131789444	5.27938070099007	5.78322975496594	4.07326276388756	4.55803890497379
ENSG00000235999	6.31528583016832	4.87718372591781	4.78448852620561	6.83936358835667	6.97977197610917	5.74895261565936	5.96799751523785
ENSG00000253193	3.39659994465825	1.59824879552092	4.38679567446152	3.80455730830565	4.28526085098457	3.06849264354608	2.41622991878119
ENSG00000212544	8.8256988202611	8.19474118843267	8.9041067715684	6.79791391099977	5.97492968513291	4.53399259181824	7.94553905292173
ENSG00000269501	5.86263210543627	4.77403976778885	5.40937527483834	6.41487475182742	6.17285744986775	4.8826572049622	5.32335888006843
ENSG00000233368	4.38243881584995	0	2.36455950793486	3.0988763445592	2.58020695810024	2.3846756967756	2.16033764350512
ENSG00000202496	7.999774522325	7.05315608763134	7.89710341763474	7.68175024014585	6.96341522894237	7.38131716655757	7.22256134818538
ENSG00000223759	3.8582351010964	0	2.36455950793486	3.27031744045796	4.28526085098457	3.65663697628436	2.63349908374298
ENSG00000203815	3.8582351010964	0	2.36455950793486	4.35468608856605	4.65476828368984	2.87448177217153	3.97712668115064
ENSG00000150337	9.08609632729678	8.64554268647294	9.30330811356318	7.77013995526049	7.62471748212909	8.18102878190351	6.75098808982511
ENSG00000203814	7.24708157411633	6.67789978807748	7.78756015477753	7.89987709582228	7.92842691624529	7.2474146720918	7.46143711345462
ENSG00000183598	4.76610961001424	4.41126059962802	4.44292819458115	6.94440482374562	6.80720724279093	4.16100570988994	6.17270731322153
ENSG00000183558	2.52747258896495	3.18761300887002	3.45416131789444	3.0988763445592	2.88814603455711	2.65026627927602	2.41622991878119
ENSG00000220323	1.75821945050536	3.71880372171819	3.65762523742616	4.42897248668723	3.92877767610173	3.06849264354608	3.27433421141826
ENSG00000261716	5.99428924190152	4.77403976778885	5.88507045799159	7.6510411921535	7.75871549285743	5.50251466960418	6.78543455744774
ENSG00000272993	2.71366837669273	1.59824879552092	3.65762523742616	4.27636593605377	4.23163395535553	3.06849264354608	4.32812344090413
ENSG00000203819	3.02651875438447	2.3378570285089	3.34054781363769	4.35468608856605	4.77210756444987	1.03953588835187	3.13880429617032
ENSG00000184678	9.82031076563777	9.65103599109031	10.5273730063534	10.1676449250989	9.94703848384388	9.52499158238344	9.71261641474112
ENSG00000184260	10.3631512466971	10.7349760995487	11.6023812720771	10.2038003925796	9.68678934268275	10.547605422564	10.2597181993941
ENSG00000184270	6.94623087372337	7.82069518145086	7.99422430408895	6.89283998885251	6.70269107802975	7.48696129477876	7.31977510473921
ENSG00000178096	4.76610961001424	5.14860253177577	5.88507045799159	6.994190051146	6.85232176816343	4.8826572049622	5.52708691895972
ENSG00000159164	3.28346946000656	4.2667716376633	3.99456469172968	1.0573276937661	2.88814603455711	4.46671360872394	7.92508602388009
ENSG00000143368	9.61935971638708	10.3017980032667	10.4160953449967	9.54484949601408	9.47667527946918	9.89491658863405	9.56675803791672
ENSG00000014914	9.90998928282452	10.3270690608701	9.31463520067598	10.2493592010338	10.2320183319595	9.25031304613244	9.26293319513006
ENSG00000163113	4.43635943476301	3.18761300887002	3.559477134893	4.42897248668723	4.38688123547116	2.87448177217153	4.44765640149965
ENSG00000136631	8.51399977615385	7.23891981900778	6.39230157503434	9.4387251310789	9.53594893552818	6.43464271053256	7.41084976175075
ENSG00000023902	12.0584735471159	12.4321854200289	12.3976585972384	11.5574402166394	11.7114187413489	12.2400771634992	12.4300890733745
ENSG00000143401	9.3529001931229	9.16195594345268	9.79483843632583	9.41607372530172	9.15345199941688	9.48729641198524	8.98768585527538
ENSG00000117362	11.0898985313289	11.887543401865	11.5981388478294	10.6736805179701	10.3702660716727	11.5032054508859	10.5466883907371
ENSG00000118292	5.13559722390137	5.69192192306556	5.40937527483834	4.80873663814149	4.48181229406492	4.98237402963518	4.50390308473326
ENSG00000187145	8.20786058800441	8.69579258767823	8.39367477319431	8.61996155553364	8.33987270291208	8.39066127842151	8.21772335871908
ENSG00000117360	10.765241902766	10.336149881271	11.1648594770622	10.3339606827833	10.631308003113	10.8152200161781	11.4985536656175
ENSG00000163125	9.92421179455017	9.87628806373968	11.4578983188707	9.97808148211966	9.92925182228335	10.3998859257674	10.7125025395342
ENSG00000143374	7.98175518546093	7.82069518145086	7.57794151283266	8.38823953315193	8.53235717720016	8.41763274936539	7.84024477500769
ENSG00000143369	3.28346946000656	4.66294991359728	5.59423424097207	3.0988763445592	3.54497674419106	4.24371680643672	5.38456055948192
ENSG00000237781	10.233998101184	9.46072459154353	8.99374325640085	8.72321224168243	9.09271002733751	8.50824956814497	8.17071929064123
ENSG00000143382	11.0542385968819	10.2948283716404	10.0867438626571	10.942127465243	11.0963635016431	10.7055030421461	9.98008113379095
ENSG00000203804	9.50888296569839	9.28897851101399	7.99422430408895	7.75577930422646	7.90720453470596	8.2426594492736	7.46143711345462
ENSG00000264508	8.69355422400525	7.89631675024938	7.77668024837608	7.51270328041041	7.89431962141854	7.67008064944103	7.61616981422411
ENSG00000264584	8.92333762928367	7.48737781610064	8.02672876304031	8.16190439632172	8.33352288008063	7.68495796289944	7.94553905292173
ENSG00000143384	15.550227421172	15.8646628116363	15.8775609570172	15.0741817753529	14.7686963590229	15.119802381927	14.4293258094199
ENSG00000253047	2.52747258896495	4.2667716376633	3.08234782447163	2.67928097903747	2.58020695810024	2.65026627927602	3.13880429617032
ENSG00000143420	10.3864522203191	11.748223732443	10.9516693773562	10.2117133590924	10.0200297682697	10.6553962891111	10.5408191764717
ENSG00000143457	6.38549766001568	4.41126059962802	5.86466564213961	6.994190051146	6.99594535351344	5.98364145099753	6.44107369323768
ENSG00000143452	5.62790857511648	5.06367942570183	5.80166027810763	6.75523803794592	6.99594535351344	5.80450397848196	6.46959972224831
ENSG00000163131	15.0619009752717	14.0693058370123	14.9584147861218	15.3081795229817	14.8589545482241	14.118987257568	13.7295508310099
ENSG00000143387	8.51713090444707	7.55115855143806	8.87379719386598	8.35051061970059	8.62885763942245	8.32094048176358	10.0771235082179
ENSG00000143437	10.6067323986414	10.2207656649629	10.9696942512188	11.2045110305542	11.224571668087	10.5322623263146	11.9587142590837
ENSG00000143379	9.82915579925083	8.98851121440328	8.85323116323991	10.575911925484	10.651868664275	9.24027594734092	8.87757194509786
ENSG00000143418	10.8705921663844	11.2420667102435	11.2326087528727	11.3206528073866	11.1029118510471	11.1210084544471	11.2203125717478
ENSG00000259357	3.02651875438447	3.47751911661863	0	2.41258988407027	3.7872620982143	1.03953588835187	3.61801924029512
ENSG00000143412	3.28346946000656	0	2.36455950793486	4.69291160528579	4.52703367828901	3.53052810100398	3.51230070833696
ENSG00000143409	8.45317955054487	7.51962061886877	7.57794151283266	9.51744605628423	9.46655517672893	7.39042239772464	8.51663761503004
ENSG00000143363	7.09613331514935	6.46260033370346	6.43444557919992	7.67413404196743	7.33163015527937	6.43464271053256	6.71569900228653
ENSG00000143443	3.02651875438447	0	2.58013212780751	3.42353226338762	3.02052882301288	2.3846756967756	4.05449043122323
ENSG00000197622	12.7657722896676	12.8854211625344	13.2360116127937	12.6844360067375	12.6431955800835	12.6753591620508	13.0276102852683
ENSG00000213190	6.54125269502438	6.35949002450787	6.74468342508526	6.9819038797432	6.35943344131911	5.72035364995096	6.75098808982511
ENSG00000143458	9.25314657988333	7.7545007440516	6.47539333497031	8.92920788666023	8.95264852925127	7.63985770608855	7.42548519520039
ENSG00000143434	6.27145775311893	5.95029741048648	4.20396899742703	6.06491439370977	6.06966441788357	6.14297239878499	7.28006233552438
ENSG00000163154	7.26953537402217	4.97344299326954	4.69486477337447	8.64744790124729	8.40793616754147	5.39804537877541	5.41421454850831
ENSG00000163156	8.18441807147555	8.26299264672416	8.29800074304698	8.57976406728531	8.24155968478122	8.34455710858651	8.54707159023202
ENSG00000163159	7.22427277562482	7.00841302452502	5.84396808459266	8.1835242821088	7.8053475148981	6.05409110452312	5.49968587121579
ENSG00000143398	9.23804480758278	10.0042828024475	10.6738318584842	9.79532713452943	9.99308893659559	9.76442552202229	10.8911734331545
ENSG00000159352	9.5446120204142	8.93572233108183	8.81119811453626	9.33387006087209	9.19432400137274	8.84933283567864	8.71433482552512
ENSG00000232671	4.67932834130867	5.37695411708694	5.13050350220326	5.63367220648624	5.49540187313454	4.65981180628129	5.35428423090093
ENSG00000143373	10.9416441033169	12.2290283776207	12.0508971300105	10.2997234586163	10.3887584089955	11.6088854794198	12.1390773811002
ENSG00000143393	11.1591794534744	11.6515094201145	11.6373831931432	10.9789124389511	11.0218053213195	11.5723464434204	9.8532149073983
ENSG00000265753	4.67932834130867	3.18761300887002	3.91741677817488	4.0121238580642	3.14177849754872	4.53399259181824	1.84905688366074
ENSG00000143390	10.0952817850255	8.9711286583916	8.89407416563121	10.510058606553	10.2472994127548	9.69997260336784	9.7796524523644
ENSG00000237976	3.50150062063204	4.10618459694941	4.06779570150376	5.50220328921588	5.04509010912583	3.87993720504894	4.2644254661366
ENSG00000159377	10.4236358550035	10.7124874074537	10.5744639711626	10.567714335893	10.2320183319595	10.3376984811347	10.5773208413456
ENSG00000143442	10.9122154494515	11.1198800656354	11.7759727707022	10.8896578435395	10.9274581102541	11.3783396112163	11.1209699586099
ENSG00000143367	6.58964585803746	7.61223855308769	8.44954538180856	5.50220328921588	5.78322975496594	8.48718471489873	8.391775368939
ENSG00000232536	3.28346946000656	5.74743165100522	4.49695825262468	2.90427965831286	3.99464891084152	4.59827337071226	5.35428423090093
ENSG00000207606	2.87855725524597	0	4.64787469213644	2.67928097903747	1.9433062058776	4.07326276388756	4.55803890497379
ENSG00000223861	2.52747258896495	0	4.38679567446152	3.27031744045796	1.9433062058776	5.02976154714248	4.84606987040974
ENSG00000250734	4.00819014552515	4.10618459694941	3.08234782447163	1.0573276937661	4.11800203082925	3.65663697628436	1.45159216230282
ENSG00000143376	11.7970640148878	10.2594660332554	10.2983673596435	12.1236652235314	12.0152727800683	10.8436740296823	10.9587622646928
ENSG00000206635	2.87855725524597	0	4.64787469213644	4.42897248668723	4.38688123547116	3.53052810100398	5.49968587121579
ENSG00000143436	7.59996562282107	7.83357725993835	8.07637208925114	7.72662191434594	7.55547329062807	7.81912922292501	7.48956720264465
ENSG00000143450	2.71366837669273	4.77403976778885	2.11101898638035	3.0988763445592	2.74237703473556	3.06849264354608	1.84905688366074
ENSG00000182134	5.06888502984787	3.47751911661863	2.36455950793486	4.35468608856605	4.61343406309207	2.05890482480417	3.13880429617032
ENSG00000159445	4.43635943476301	5.44568927656727	5.26113905215424	5.91788579843229	5.89093612963614	5.39804537877541	5.41421454850831
ENSG00000197747	11.5412412939637	13.3958716694921	13.0216475970122	11.7289785649371	11.4923590594573	11.6473731333989	11.2421786898598
ENSG00000229021	3.50150062063204	2.3378570285089	4.94858532820136	3.0988763445592	1.9433062058776	2.05890482480417	2.63349908374298
ENSG00000163191	11.2343505726449	11.1523747712112	12.2747319175363	11.383883437839	11.1260591270701	10.9575601027213	9.28517084693584
ENSG00000163220	14.1473679166854	14.2780807825068	15.1811929125582	14.6288367353965	14.2837240335685	13.120693536099	12.3603930432701
ENSG00000163221	9.33704157565857	10.0436192212876	11.3432085541063	10.4611093599756	9.72367617092901	9.3067092738982	9.04093210424745
ENSG00000143546	13.4056060167576	12.9793400049307	14.1722442510359	13.8915602211592	13.6130870712267	12.076236422086	10.3678614180343
ENSG00000197956	12.5796997494545	13.817645286286	13.6080874369154	12.8211008507451	12.3402521599848	12.9219278856696	11.8621660915584
ENSG00000196420	2.31363461767247	4.2667716376633	3.08234782447163	2.90427965831286	1.9433062058776	3.65663697628436	4.66057284562319
ENSG00000196154	12.1930370749775	12.5942376005432	12.8048409908172	12.2889256521101	11.8263918797169	11.9425698798135	11.1852675940824
ENSG00000189171	4.58699099674475	4.87718372591781	4.74037249381492	4.42897248668723	4.88061691203016	4.65981180628129	3.51230070833696
ENSG00000272030	4.32642440952544	5.37695411708694	3.91741677817488	4.35468608856605	4.77210756444987	3.23947903556953	3.27433421141826
ENSG00000160679	10.2282778765132	10.5046929515041	10.5192368968755	10.3230442170579	10.3213673157608	10.5557221722449	9.72745675620288
ENSG00000143553	7.18543799534824	6.42904243238721	6.67608223907311	7.51270328041041	7.3123858578975	6.45214130295204	6.44107369323768
ENSG00000143621	10.0222324177076	10.1426941217864	11.0413282666099	10.0577982813747	9.75252128449112	10.1030838406561	10.5239172137487
ENSG00000143624	10.3873080336739	8.32816057182387	6.97152764306758	10.8454159302394	10.9782040222484	7.5287942382695	7.5442335303869
ENSG00000143554	10.3890181388704	8.83041149092945	7.76571766863921	9.90024434238098	9.93240662171218	8.80235146675676	8.37302188746984
ENSG00000143614	10.4679981442378	11.5390218975195	11.9219810620937	11.0774728102215	11.0741598007706	11.2941247971982	11.9662411309031
ENSG00000223599	6.86007938844453	7.15929513062184	7.96097059418994	6.89283998885251	6.93013465602291	8.84933283567864	8.98768585527538
ENSG00000198837	12.7939598644124	12.4958670623759	11.6355025801814	12.3742432541462	12.6840095705076	12.0577807918966	11.1608756724825
ENSG00000160741	10.7835599340982	11.362506532512	11.1380125253359	10.3193869617052	10.5549010397174	11.4300315365384	12.0694391896112
ENSG00000143570	9.36858638071188	8.70283037337615	8.19960728861524	9.69916326655293	9.36124674994305	8.69987621655326	8.60286306757524
ENSG00000143578	4.80761810241189	3.92545733628	3.34054781363769	5.23865266772122	5.51797776001144	3.23947903556953	4.80188335580512
ENSG00000143543	10.0200268983132	10.5227020322605	10.2292233898764	9.5089084271875	9.37058053108474	10.3103749602404	9.58153562784607
ENSG00000272654	3.16070707689657	0	0	4.42897248668723	3.54497674419106	2.87448177217153	1.84905688366074
ENSG00000143545	6.04723227831074	7.47098210269405	7.26414513694348	6.04142677877375	5.58366012892633	6.38083626039996	6.2893149401696
ENSG00000177954	10.8067750118663	11.0247969068737	11.7301823516664	10.6803489784229	10.5231680037854	11.0850075282798	10.4903777084837
ENSG00000143552	4.20741605952151	4.54258695386237	3.65762523742616	4.0121238580642	4.52703367828901	3.39233067961497	4.93057907059869
ENSG00000231416	2.06249186112524	4.41126059962802	5.38092154114533	4.0121238580642	4.65476828368984	3.06849264354608	4.61021658379842
ENSG00000143549	13.3537886900683	13.3303526710864	13.8412593490917	12.9585274697749	12.7749784983281	12.9332647424289	12.7090564426961
ENSG00000264384	7.04498639954504	3.71880372171819	6.52824287784407	6.90590500865963	6.9046605172509	5.85799539478879	6.95642737580232
ENSG00000163263	2.52747258896495	0	3.74951942146031	3.0988763445592	3.14177849754872	4.32194201456219	3.27433421141826
ENSG00000143612	10.2138772939926	10.5906752922671	10.5830761440372	10.4058496149419	10.0435619947498	10.4767045994253	9.21319107342334
ENSG00000143569	11.056392468975	11.1446425301347	11.5203767481928	11.2097885655232	11.2759754555827	11.2837782604049	11.6232136365417
ENSG00000252817	6.46547609435341	6.91453564667503	5.9051906977386	5.72496432297004	6.09990894493305	6.45214130295204	6.0832398901871
ENSG00000143575	8.33395362623628	7.7545007440516	7.22466109403551	8.33610395916588	7.94518287451503	7.80557934229614	7.10019070618902
ENSG00000143515	6.65932170632074	7.93269123210935	7.02766896117629	6.24020076090736	5.99115713372447	5.12010807646623	7.98559525517527
ENSG00000228013	4.32642440952544	5.85242736401778	5.46465259151805	2.41258988407027	2.58020695810024	2.87448177217153	0.901145829698065
ENSG00000160712	11.3803359332518	12.6630605187347	12.1572235152162	12.237207487569	12.0882761743757	11.5847945038399	10.8216456045117
ENSG00000273110	2.52747258896495	0	3.08234782447163	2.67928097903747	3.63034018261103	2.05890482480417	2.98920973011426
ENSG00000160714	9.78697467207146	10.1683430212438	10.5151515707829	9.62406861516863	9.3875371867331	10.1600961437929	9.36136116620865
ENSG00000233875	3.50150062063204	0	4.38679567446152	4.80873663814149	4.80919159114902	4.32194201456219	5.01041068592179
ENSG00000160710	13.2394809215143	12.3946479336699	13.3404850353285	12.7943449393001	12.7398465822495	12.908125760526	12.3474821912646
ENSG00000143603	3.39659994465825	2.3378570285089	2.58013212780751	3.91207030110164	4.23163395535553	2.3846756967756	3.97712668115064
ENSG00000163344	7.13741282843615	4.77403976778885	5.54378948109294	6.91885277295681	6.71251167776958	5.63098925509111	5.49968587121579
ENSG00000270361	3.02651875438447	3.47751911661863	4.59930241668139	5.10907919827554	4.57088056931403	1.63743986325387	3.89537809682773
ENSG00000163346	9.60471679107358	9.31217397513362	8.21983015261048	9.29218671712666	9.34555498842555	8.55758468098048	9.27105932862109
ENSG00000163348	8.35510484061975	6.89007976595666	7.14229539309654	8.51302348274127	8.49586012878851	8.05499568646802	9.13297887158666
ENSG00000271380	3.02651875438447	3.18761300887002	2.11101898638035	3.56202644573208	3.02052882301288	3.65663697628436	3.71651699463577
ENSG00000160691	10.2945555828103	10.8344553389525	10.951064652479	10.0694573697533	9.93555453746394	10.5966185499796	10.5458513920169
ENSG00000173207	4.58699099674475	0	4.54903767577975	5.0157438459489	4.65476828368984	3.23947903556953	3.89537809682773
ENSG00000160688	7.999774522325	7.71327539387474	7.09927928262448	8.22581570473928	8.33352288008063	7.75007017783034	8.37302188746984
ENSG00000160685	11.8941877601657	11.9226306253016	11.7085204159666	11.8958410267144	11.7515640579311	11.6359342617337	11.6723592570344
ENSG00000163354	5.19936041834003	3.92545733628	3.34054781363769	3.68838235732035	4.48181229406492	3.77260308406909	4.05449043122323
ENSG00000163357	4.58699099674475	4.87718372591781	5.71313016954141	3.56202644573208	3.25362320518174	5.20512868499163	9.24860138497384
ENSG00000232093	2.87855725524597	4.2667716376633	1.80321559338192	3.80455730830565	3.63034018261103	2.87448177217153	2.63349908374298
ENSG00000143537	10.6763076005662	11.318511405113	11.0085736597835	10.5355012857561	10.7528749219918	10.9336233447352	11.9571412058166
ENSG00000243364	4.962649881597	4.87718372591781	5.66674086892645	5.46737492781417	5.62584377668664	5.1632445922549	5.98785525421123
ENSG00000143590	2.31363461767247	4.66294991359728	0	3.42353226338762	1.9433062058776	2.3846756967756	3.27433421141826
ENSG00000169241	8.06968218760569	8.46691047997062	8.1540932602514	8.11766768352163	7.70069152490754	7.71426010017926	7.84024477500769
ENSG00000179085	5.76064540669635	6.70619262950823	5.84396808459266	5.39508956267286	5.32662987017613	5.83149758792892	5.58037548184334
ENSG00000163463	6.28621554841451	7.79458072361512	5.69012196495273	6.4330392337477	6.63200883217689	6.84550457581941	7.72665633902984
ENSG00000163462	2.06249186112524	0	1.80321559338192	2.67928097903747	2.88814603455711	2.3846756967756	5.88571491467436
ENSG00000185499	5.40265159356891	5.74743165100522	6.69931364132866	2.90427965831286	3.02052882301288	5.32394473428681	6.18995377012667
ENSG00000169231	8.65142948811582	8.88712029114542	7.59042139070137	8.85367835608367	9.07569035046456	8.02022291626898	8.19654752397255
ENSG00000173171	7.47027224794351	8.84320748459898	8.19960728861524	8.54260309424795	8.31752496408338	7.50384030955288	7.82376623654047
ENSG00000160766	3.28346946000656	2.3378570285089	3.65762523742616	4.19354868309829	3.7872620982143	2.87448177217153	4.44765640149965
ENSG00000177628	8.67685163595703	7.72714848141846	8.34294758511222	9.35068977950469	9.17314399908614	7.93567077227504	8.47151204310373
ENSG00000216109	2.52747258896495	0	3.08234782447163	3.42353226338762	3.92877767610173	3.23947903556953	3.80871760677765
ENSG00000160767	8.24232525144534	8.57057796237566	7.63326992936038	7.9448795859157	7.81904818474126	7.39947052358049	7.04439244578269
ENSG00000116521	8.43673874152707	7.36849083699411	7.40504040182125	8.83672223426266	8.54340378333127	8.74671553894433	8.3654517012798
ENSG00000176444	9.51359376457926	9.24626306286142	9.32026556805769	9.90675820069064	10.2087888735984	9.33055809103858	9.85050600847481
ENSG00000143630	4.58699099674475	1.59824879552092	2.36455950793486	4.69291160528579	5.22051235652374	3.23947903556953	5.25944545529963
ENSG00000160752	8.12819043075444	7.2194218400429	7.78756015477753	8.46086041536107	8.36499615207793	7.79875637823512	8.10859200872908
ENSG00000225855	5.23021542769131	4.2667716376633	3.21721640213654	6.21941977646647	6.39645754015496	3.06849264354608	5.38456055948192
ENSG00000160753	8.25363290728497	7.42064642058157	7.03681706304763	7.79141641303724	8.03009424958054	7.35365151731474	8.14442021833848
ENSG00000116539	11.5496753085014	11.351352996679	11.852767036273	11.9181778282409	12.2048335670043	11.7596717005293	12.374839883497
ENSG00000207134	3.39659994465825	0	2.11101898638035	3.91207030110164	3.71093363876742	3.06849264354608	3.51230070833696
ENSG00000227773	4.07770084731778	3.92545733628	3.74951942146031	4.19354868309829	4.69495116024669	4.93337697972829	4.75630063197813
ENSG00000238805	2.52747258896495	4.41126059962802	2.58013212780751	3.68838235732035	3.25362320518174	1.63743986325387	3.13880429617032
ENSG00000235919	5.84280339236809	8.06965786667644	6.8313546901246	6.26068665573752	6.25578937922957	6.81877420782221	6.35194672594708
ENSG00000125459	5.60454799494711	0	4.13748839636131	5.50220328921588	6.20103445575336	4.46671360872394	5.49968587121579
ENSG00000203761	2.52747258896495	0	2.58013212780751	0	2.74237703473556	2.65026627927602	0.901145829698065
ENSG00000246203	4.32642440952544	4.66294991359728	3.99456469172968	4.56696956045767	4.80919159114902	5.20512868499163	6.80795026919743
ENSG00000163374	10.6643539765029	11.1485138308634	11.4027988587501	10.297246568882	10.5583085977712	11.6340189342075	11.6472154810516
ENSG00000132676	9.48509544023424	9.49356181297009	9.28614896791909	9.78475692492998	9.6139947065018	9.37710462970261	8.95022105550243
ENSG00000116580	10.2529033546915	10.3225071261545	10.8313070502247	10.5025525114408	10.7892906684051	10.6248608577739	11.1427224625709
ENSG00000132718	8.79507040022305	6.28641389541695	7.89710341763474	8.80220015837759	8.5840911947008	8.34923439391055	8.44302417640412
ENSG00000143622	10.6501629004179	12.2531998192882	12.8845933309524	10.5542930999043	10.5126675123192	12.4484177902815	12.2176471295472
ENSG00000132680	9.06485669625921	9.5991739614974	9.55326767949272	9.65921398817098	9.95429913975074	10.1058504145792	11.618444592974
ENSG00000207475	5.19936041834003	6.20943785841715	4.94858532820136	4.10568625799139	4.38688123547116	4.8826572049622	6.67952503505705
ENSG00000252808	5.03433527380244	5.95029741048648	5.71313016954141	5.0157438459489	4.61343406309207	5.53572172234859	7.41818603705758
ENSG00000116584	12.2672057820882	13.6054316468351	13.1824046993989	12.1403442659408	12.2527324774273	13.1314250753384	13.7647765551524
ENSG00000273002	4.5385071835112	7.23891981900778	4.69486477337447	3.0988763445592	3.45424297564438	4.59827337071226	5.08605547994802
ENSG00000163479	10.8601500892939	11.5930511415235	11.5958195292234	10.912494484127	10.644833938513	11.4305833529877	11.0459974906693
ENSG00000160803	8.50140686136451	8.71680377905063	8.99609022893528	8.46528010177999	8.32714498578338	8.42207937574057	9.34797893348596
ENSG00000116586	7.23191584564647	6.61959308374914	6.86255947062133	7.7412742682103	7.21902051079987	6.691951849183	6.39719836207634
ENSG00000160789	11.9433155126776	15.1226381730725	13.9348367503592	10.1730588021531	10.0435619947498	11.4513974980729	12.142680204119
ENSG00000196189	11.6411291397673	11.437201735188	11.3316399255091	11.5276381595665	11.4708227131455	11.3259134499258	10.9556145459523
ENSG00000160785	9.65816894672179	9.84163599922552	10.6032301219421	9.77766684693725	9.83462605019962	10.6862233338115	11.131608307453
ENSG00000160783	8.93742979362187	8.95942283272972	9.45603031760636	8.42953759060203	8.45841576760385	9.36791468790903	7.79587671287414
ENSG00000242252	3.28346946000656	0	3.65762523742616	3.27031744045796	3.45424297564438	4.32194201456219	3.51230070833696
ENSG00000160781	7.6233999198575	8.4078421743518	8.28270180267718	7.41556000153341	7.59317105339728	8.26758161342222	8.72620519678692
ENSG00000198952	11.1476086891375	11.5311355681444	11.7124507813407	10.9719407323919	11.2386576577237	11.5281702685233	11.5988057124914
ENSG00000163472	5.69580302854551	0	3.65762523742616	6.58698145166972	6.5685395211044	3.39233067961497	2.16033764350512
ENSG00000198715	8.6990790564958	8.73064314079501	8.64765827621049	8.86375718860958	8.75300378637641	7.89786004685623	7.93534878331771
ENSG00000163468	9.01256828638639	8.50766886377107	8.95083146212794	9.71780480289051	9.41185099760864	9.17063520473005	8.46444263980093
ENSG00000125462	3.02651875438447	3.47751911661863	4.20396899742703	3.42353226338762	3.45424297564438	3.39233067961497	4.7092305767412
ENSG00000236947	3.16070707689657	5.228803390048	5.5178898648864	4.69291160528579	4.43512744608647	5.32394473428681	5.04872881135868
ENSG00000116604	13.1321487661179	14.2508789279688	13.9282460125479	12.2265074185679	12.4246330379951	14.4854142234042	13.8357474530731
ENSG00000206651	5.88219197918911	5.85242736401778	5.9051906977386	6.04142677877375	6.39645754015496	6.76378017095919	6.98634898162409
ENSG00000183856	3.50150062063204	8.7579298497411	7.54626117921345	2.67928097903747	3.02052882301288	6.67714685375337	6.2893149401696
ENSG00000163382	7.83390597739174	8.63085812925533	7.88195447930643	7.37854799947414	7.29941221799108	7.47844715069099	7.09103957763736
ENSG00000160818	6.65932170632074	6.12812207138205	5.86466564213961	6.61906940064924	6.51342839449543	5.39804537877541	4.38912753927669
ENSG00000143320	5.76064540669635	6.20943785841715	5.64297459524697	4.35468608856605	4.80919159114902	6.48651435071347	6.76256187113569
ENSG00000223356	5.37530578225617	6.32341459670417	4.69486477337447	4.69291160528579	4.94867227456321	5.80450397848196	6.56522022739225
ENSG00000143319	9.63385551243434	9.59539720308714	9.68129268056687	9.58195338836194	9.59686514144059	9.82276248485303	9.76102110443974
ENSG00000143303	8.59030881070281	8.01415983163095	6.99048519881172	8.65906932421217	8.53789105311769	7.90423105243162	7.2474857717212
ENSG00000143314	5.939329080064	4.66294991359728	4.38679567446152	5.81082177166205	5.83808782983519	4.71883234332833	4.7092305767412
ENSG00000143321	11.2127870781852	11.6221123874223	11.3445905762587	11.3157662968801	10.9561574066507	11.4573670231189	10.9929413386972
ENSG00000143294	9.3875296245993	9.7596413509629	9.8709805094126	9.22601103748475	9.23065688953557	10.0012664341986	9.41368228084203
ENSG00000027869	6.22625638073179	5.74743165100522	4.59930241668139	5.94345483044396	5.68689303038228	5.02976154714248	3.27433421141826
ENSG00000187800	4.5385071835112	4.66294991359728	3.559477134893	1.0573276937661	1.27675269354415	3.53052810100398	2.98920973011426
ENSG00000132694	11.6447123562841	10.7072475457808	11.2728469910016	11.5815590339698	11.7578019068541	11.229634611369	11.169595679894
ENSG00000211581	3.28346946000656	3.18761300887002	1.80321559338192	3.0988763445592	3.35741753305583	3.23947903556953	3.80871760677765
ENSG00000117036	10.4484497832559	11.0933468281987	11.1041436882166	9.71965577665484	9.48386070653626	11.1799582828665	11.6401744053198
ENSG00000160856	4.38243881584995	0	2.36455950793486	5.63367220648624	5.68689303038228	1.03953588835187	2.16033764350512
ENSG00000163534	4.67932834130867	0	0.871836374156443	2.67928097903747	3.92877767610173	1.03953588835187	2.63349908374298
ENSG00000227295	3.16070707689657	0	1.80321559338192	2.41258988407027	3.02052882301288	3.23947903556953	3.13880429617032
ENSG00000158473	10.919924836201	10.966049069646	9.9200092492384	11.2025269670217	11.1645767151806	10.8328607160129	10.9966214463016
ENSG00000158477	4.962649881597	3.18761300887002	2.7676411147326	5.94345483044396	5.44916180219155	1.63743986325387	1.45159216230282
ENSG00000158481	6.73657280576639	7.2194218400429	4.98685043944224	7.0773826637146	6.40859072937429	4.93337697972829	4.75630063197813
ENSG00000158485	2.71366837669273	0	2.11101898638035	2.67928097903747	2.74237703473556	1.03953588835187	2.41622991878119
ENSG00000163563	11.0330680860129	9.33952505474906	10.1375899598037	12.7492983469243	12.4466808270793	9.07504801682713	9.63288521105975
ENSG00000163564	5.26042433317434	3.92545733628	4.20396899742703	6.48619949733735	6.75113892339321	3.23947903556953	1.84905688366074
ENSG00000163565	9.9557088870615	8.39051158342707	10.204065987089	10.9229755704817	10.8879210434655	8.68144826418803	9.17905056229026
ENSG00000163568	6.34378189757991	2.82441493502978	3.74951942146031	6.4330392337477	6.62162262899097	2.87448177217153	3.61801924029512
ENSG00000179639	5.06888502984787	6.04194781204247	4.32839041862219	6.19833507676299	4.65476828368984	5.28541649545005	5.08605547994802
ENSG00000158716	7.7879822375187	8.1230998355443	6.42053392067172	6.74072753148554	6.52462032742426	6.73547651835367	5.41421454850831
ENSG00000181036	6.16369681392023	0	1.41141623664498	5.78276653947435	5.92512256732836	2.65026627927602	0.901145829698065
ENSG00000158714	5.88219197918911	3.71880372171819	4.13748839636131	6.21941977646647	5.85591989942816	3.87993720504894	2.41622991878119
ENSG00000213085	5.82269834678899	7.53547576252964	6.24220556828899	5.27938070099007	5.54020580626647	5.80450397848196	8.66893025103294
ENSG00000269620	7.04498639954504	8.11256864195348	6.94261588455501	6.45097785366734	6.40859072937429	6.18544054593997	7.81823129690877
ENSG00000158710	12.4825321670443	13.2932403725729	12.6384719188957	12.3618517421809	12.0122942634301	12.2178713993048	11.9935084805373
ENSG00000085552	2.71366837669273	5.228803390048	2.58013212780751	2.90427965831286	1.27675269354415	1.03953588835187	0.901145829698065
ENSG00000162723	4.72337138775065	5.634190616605	4.86886878324354	0	0	2.65026627927602	2.41622991878119
ENSG00000260766	2.52747258896495	0	1.80321559338192	4.86333897989	5.10596522064134	3.97983584168637	4.32812344090413
ENSG00000143315	6.68181874806234	5.634190616605	5.66674086892645	7.75577930422646	7.915730986106	6.6470731279014	7.10019070618902
ENSG00000162729	7.96350793649822	7.7545007440516	6.50206009431387	7.6968630664651	7.8053475148981	7.00813186587994	8.62838953709661
ENSG00000227741	5.48171013170767	5.51129803534179	5.32227308575772	4.91594990284807	5.54020580626647	6.28644387823637	7.08183003201355
ENSG00000162734	10.8315101527526	11.1904263058688	10.7397392698093	10.4982457148515	10.2405277958044	11.0793883117655	10.4353995134584
ENSG00000132716	10.0910856415039	9.54537785228607	9.69146580232422	10.5143303347028	10.6091363914042	9.77663043803128	10.5050934490436
ENSG00000228606	3.16070707689657	2.3378570285089	3.34054781363769	3.56202644573208	3.02052882301288	2.05890482480417	3.71651699463577
ENSG00000162735	8.37595043434686	7.90854376175175	8.76515404667231	8.68203504121284	8.45256785197105	8.18626643105639	8.4102882001986
ENSG00000122218	12.0840356966399	12.2633513037107	12.222320029635	12.2757757828887	12.237934186563	12.1200004611581	13.191106565706
ENSG00000202078	4.58699099674475	3.71880372171819	5.26113905215424	5.15357600954391	5.94191672466445	5.80450397848196	6.8190777080575
ENSG00000162736	11.0347076620325	10.6519578073264	11.1664232585375	11.3733396225574	11.2813464648846	10.8585137559001	10.0921078601365
ENSG00000171786	3.77697631888484	0	4.32839041862219	2.41258988407027	3.63034018261103	3.87993720504894	4.32812344090413
ENSG00000162739	4.84796565750879	3.18761300887002	4.32839041862219	6.15521808676479	5.89093612963614	4.24371680643672	4.1977846616995
ENSG00000066294	10.1993315183485	11.2849047560797	11.5162946531482	10.7271050199682	10.5972590626976	11.5084421993135	10.0921078601365
ENSG00000117090	3.8582351010964	5.57405246995406	3.91741677817488	3.27031744045796	3.54497674419106	5.63098925509111	3.61801924029512
ENSG00000117091	11.7355550885685	11.9271449450951	11.2982699696777	11.4156313114971	11.0482200368327	11.5833063952471	10.2880240406309
ENSG00000026751	8.49188951125477	5.14860253177577	7.66311514336689	7.76297749799013	7.85495968732367	6.5200874626139	6.32097068594381
ENSG00000122224	4.99893777460154	6.20943785841715	4.64787469213644	4.27636593605377	4.88061691203016	4.46671360872394	4.66057284562319
ENSG00000122223	9.32815532022629	8.01415983163095	7.88195447930643	10.4354344763034	10.2599111578578	8.25268003669578	7.96069075746468
ENSG00000179914	3.28346946000656	3.47751911661863	1.80321559338192	3.56202644573208	2.74237703473556	2.3846756967756	1.45159216230282
ENSG00000158769	8.63422905569755	8.27248452308512	7.98006646491069	8.98875090940823	8.6772999653887	8.97570339725272	8.6472422933441
ENSG00000215845	4.07770084731778	4.2667716376633	4.06779570150376	4.80873663814149	5.07584872236753	4.71883234332833	5.22639460102414
ENSG00000158773	10.8327672615312	11.1238182956293	11.1907037577248	10.8163028861943	10.9566739637022	11.0415977515856	11.242695293686
ENSG00000186517	12.884331150977	12.9782528175989	12.1975508436919	12.6959994814481	12.642874639045	12.8031591519106	11.3625699487304
ENSG00000143217	3.69086607913953	8.85589098117666	6.17750338550684	1.0573276937661	1.27675269354415	7.62450544294229	7.38112581201178
ENSG00000228917	1.37213626134902	5.69192192306556	2.7676411147326	1.66090413924776	1.27675269354415	2.87448177217153	3.61801924029512
ENSG00000143256	6.58964585803746	7.51962061886877	6.77779830735889	5.66474922567674	5.92512256732836	6.60075339279275	7.57737712728132
ENSG00000158793	7.94502693614792	7.13868283560165	6.96195462335213	8.92279482939601	8.62885763942245	7.38131716655757	8.20080762939551
ENSG00000158796	9.41967509495394	9.96677010457546	10.4567079990042	9.43196697361875	9.39059891654037	9.66850570863542	9.98996135381891
ENSG00000143222	8.4433375650465	9.00568682468622	9.03084421024502	8.51728645403996	8.30459766340822	8.56162078852564	8.42128293328693
ENSG00000224985	1.37213626134902	3.71880372171819	1.80321559338192	3.56202644573208	2.39747163545167	2.3846756967756	2.41622991878119
ENSG00000143258	8.49824138234374	8.4078421743518	7.73232108147957	8.75243792965754	8.66470884808454	8.04349763616573	9.49745365564013
ENSG00000143224	7.54580382200242	7.17961707397036	7.07284019598778	8.024904513118	8.08782429150134	6.72111370210923	7.19719874171595
ENSG00000158850	9.32458543547541	9.6473927568942	9.89758745241333	8.82301237265123	8.95264852925127	9.85929057386766	10.0058737817067
ENSG00000158864	9.35640078143764	9.21214289556298	9.28997978744117	9.65728376742236	9.65021254908223	9.4766483404317	9.28917748614455
ENSG00000158869	12.0555154177857	11.1966717857073	12.4529510034538	11.5967458374085	11.4308563622116	11.5455958973131	10.6853968970711
ENSG00000268387	7.57012709886185	7.6992676051042	7.8250063960927	6.01755043937289	6.5576844300944	7.79190099281365	8.03891730935312
ENSG00000158882	10.2282778765132	10.0042828024475	10.9272804592217	8.6000028085806	8.69969070812906	9.89970722646976	10.7420344269191
ENSG00000263548	3.69086607913953	3.71880372171819	3.91741677817488	2.085159318413	2.74237703473556	3.87993720504894	3.51230070833696
ENSG00000158887	6.65932170632074	8.13355471168283	6.61631241234671	7.13399950163994	6.97977197610917	7.14353948817574	7.29607886010553
ENSG00000143252	8.70458281220677	8.38176758766562	8.29037155231071	8.83330696364296	8.69474493257934	7.93567077227504	7.44716367559511
ENSG00000235477	4.88721545208304	2.82441493502978	4.49695825262468	5.19674137596824	5.87353424854626	3.65663697628436	5.01041068592179
ENSG00000206921	2.52747258896495	0	2.7676411147326	2.41258988407027	2.74237703473556	1.63743986325387	1.84905688366074
ENSG00000215840	4.07770084731778	0	3.45416131789444	3.68838235732035	3.45424297564438	3.87993720504894	3.13880429617032
ENSG00000143226	12.1720843527644	11.407355332422	11.6766859640666	11.8331039072092	11.5595314635201	12.0481041252636	10.2443227668035
ENSG00000273112	3.50150062063204	2.82441493502978	4.86886878324354	4.35468608856605	4.33696559891426	5.46852523391801	4.1977846616995
ENSG00000173110	6.98292887225558	7.13868283560165	7.43993957116394	7.77013995526049	7.8281102113407	7.54519358163213	5.82076904207356
ENSG00000203747	12.4897224296152	9.22686474398138	10.5346564795948	11.959883721213	11.5961304045519	9.67597166731508	8.29547078972445
ENSG00000072694	7.68037252123687	7.11777177164864	6.96195462335213	5.43168492472469	5.87353424854626	6.99625261872009	6.13758328750617
ENSG00000244682	11.8504826764275	9.81590123336103	10.3181991179017	10.091067405537	10.2396791044862	9.75564407376695	7.9302265292289
ENSG00000225217	10.4144294061262	8.77806144570287	8.96767137969819	9.00705462824821	9.34713186724502	7.69968342360307	6.98634898162409
ENSG00000162747	3.39659994465825	7.05315608763134	5.56923232898555	7.95119543270257	7.64537161271225	2.65026627927602	0
ENSG00000162746	3.59928809165048	4.2667716376633	3.21721640213654	1.0573276937661	1.9433062058776	2.3846756967756	1.45159216230282
ENSG00000081721	7.35601099677624	8.1230998355443	8.11143271779933	7.37854799947414	7.04340526271794	8.21217319157724	6.7275582005088
ENSG00000226889	2.87855725524597	3.18761300887002	2.36455950793486	3.56202644573208	3.02052882301288	1.03953588835187	3.61801924029512
ENSG00000118217	10.8785265973641	9.92525025096724	11.2562988197513	11.1236390134257	11.0019222574099	10.9289441965463	11.3176729728583
ENSG00000229808	6.09830102585113	5.80088446224794	7.24058461732912	6.26068665573752	6.17285744986775	6.46943019414137	7.87797815857263
ENSG00000162745	4.72337138775065	3.71880372171819	5.56923232898555	4.42897248668723	4.43512744608647	4.53399259181824	1.84905688366074
ENSG00000198929	2.71366837669273	0	3.21721640213654	2.085159318413	3.54497674419106	4.65981180628129	1.84905688366074
ENSG00000198574	8.38626135877862	4.97344299326954	3.45416131789444	7.5630569149615	7.16996968111112	5.39804537877541	3.39821835481663
ENSG00000152332	11.9572148096243	11.2432739934131	11.623028670086	11.6544924377514	11.4920027421686	12.1090109246095	11.9596572684103
ENSG00000117143	8.5602677889716	9.39706467247955	9.8477773657641	7.12285248875394	7.08179636319233	9.38623640207289	8.53024314742215
ENSG00000272574	5.76064540669635	5.14860253177577	4.32839041862219	2.085159318413	3.02052882301288	5.93468816486192	4.50390308473326
ENSG00000162733	2.71366837669273	0	4.94858532820136	1.66090413924776	1.27675269354415	3.97983584168637	4.1279158850238
ENSG00000132196	5.4558356869199	4.2667716376633	4.59930241668139	6.83936358835667	7.01987045862909	5.59992719236522	5.44327126829131
ENSG00000232995	3.50150062063204	3.47751911661863	2.58013212780751	4.96670956938878	4.73404509862801	2.05890482480417	2.63349908374298
ENSG00000143228	3.59928809165048	0	4.38679567446152	3.42353226338762	2.88814603455711	4.3961429931308	1.45159216230282
ENSG00000185630	3.77697631888484	4.87718372591781	3.65762523742616	1.0573276937661	2.39747163545167	1.03953588835187	3.27433421141826
ENSG00000143198	8.31967855271772	8.11256864195348	8.19960728861524	8.73057435508035	8.48444195128735	8.13842862898349	10.2193431619809
ENSG00000143149	8.80022050586607	8.5236551741023	8.80317873800895	9.18104096610812	8.91911573766289	9.41328995196303	9.05040559283956
ENSG00000143183	9.09660002196565	8.16447229999671	8.5678640456357	9.42970720102123	9.22036909559325	8.96964097401557	8.12213207035233
ENSG00000224358	3.16070707689657	5.06367942570183	2.36455950793486	3.42353226338762	3.45424297564438	2.3846756967756	2.98920973011426
ENSG00000143179	7.01871648921859	6.28641389541695	6.31920466470295	7.54646688037646	7.27973034894158	6.81877420782221	7.93534878331771
ENSG00000215835	3.02651875438447	3.92545733628	2.58013212780751	3.80455730830565	3.25362320518174	2.05890482480417	2.63349908374298
ENSG00000143157	10.5619537887248	9.97260515806364	10.2559095224978	10.7918783047787	10.6202647890325	10.8058928391463	10.6311874186278
ENSG00000152382	7.31342101064221	5.85242736401778	7.34738396931438	7.14506104684761	7.23273408346796	7.5287942382695	6.48365397340979
ENSG00000225171	3.02651875438447	2.3378570285089	0.871836374156443	2.67928097903747	3.71093363876742	3.53052810100398	3.71651699463577
ENSG00000143195	3.50150062063204	4.2667716376633	4.74037249381492	3.27031744045796	2.18818721642471	5.63098925509111	1.84905688366074
ENSG00000143167	3.77697631888484	0	0	3.0988763445592	2.39747163545167	2.87448177217153	1.45159216230282
ENSG00000272205	2.06249186112524	2.3378570285089	2.11101898638035	3.27031744045796	3.7872620982143	3.39233067961497	3.71651699463577
ENSG00000143190	10.0277315100121	8.83041149092945	10.4187220814318	10.4173003172205	10.4828529173953	10.6908371644671	11.896385857026
ENSG00000272033	6.49117974274324	3.71880372171819	7.28732706632893	7.13399950163994	7.56091937037609	6.6470731279014	9.02660420042731
ENSG00000198821	7.45075488575672	5.99685027579024	5.66674086892645	8.21010134399531	7.89431962141854	5.59992719236522	4.61021658379842
ENSG00000233411	3.9351600549912	2.82441493502978	3.08234782447163	4.19354868309829	4.65476828368984	3.65663697628436	0.901145829698065
ENSG00000273160	3.69086607913953	4.54258695386237	2.11101898638035	4.27636593605377	4.91504584779566	3.06849264354608	1.45159216230282
ENSG00000143162	10.8188784481682	11.0635853465705	11.3049113395796	10.9508211631016	10.7343164506947	11.1746976401855	11.1068515368593
ENSG00000241666	2.87855725524597	3.71880372171819	1.41141623664498	2.90427965831286	3.92877767610173	3.77260308406909	3.97712668115064
ENSG00000198771	11.5576802233237	10.1885387990582	9.44919454655102	12.046127175889	11.8261092147986	10.4144649872487	9.37273367447789
ENSG00000197965	8.71825103742395	7.85900138994838	8.23580679139662	9.69352350944804	9.35185218874493	8.3161704075235	9.84507290348912
ENSG00000143199	1.75821945050536	4.41126059962802	1.80321559338192	3.27031744045796	2.18818721642471	3.06849264354608	3.51230070833696
ENSG00000143158	7.96809143103807	8.39051158342707	8.92642825431601	8.16733981766724	7.65558884157245	8.22240702456327	7.99543791239207
ENSG00000143164	8.89954041222236	7.83357725993835	8.73455814851359	9.60816934591685	9.55926504932996	8.47010854197995	9.20260869352212
ENSG00000143155	7.6521674361129	7.03095800415742	7.69813304789061	8.36949840726785	7.99833351713172	7.14353948817574	6.85195415726246
ENSG00000213064	12.9143282019593	12.5871236892517	13.6980515587603	12.6199925008763	12.6038339235013	13.4697907042984	12.9780552604989
ENSG00000143178	6.89900538573889	0	5.29202986317183	6.90590500865963	7.23273408346796	4.7755329522519	5.70557352098211
ENSG00000143153	7.51481145667736	8.00279935725202	9.10230093200971	7.39717268902525	7.05116564703731	8.25268003669578	8.49598566977256
ENSG00000143156	5.31900825339626	0	5.22957231153101	5.83834182127342	6.03877224593677	4.46671360872394	5.41421454850831
ENSG00000117475	7.8288749360051	8.73751335406451	8.65064087108507	8.08931470254841	7.93263418574251	8.02022291626898	8.15762967980396
ENSG00000117479	7.52728841023694	7.48737781610064	8.91158570481903	6.82567892375686	6.53572610511303	8.39066127842151	8.61248849946164
ENSG00000234604	2.71366837669273	4.2667716376633	3.74951942146031	3.68838235732035	3.45424297564438	4.07326276388756	3.13880429617032
ENSG00000213062	5.06888502984787	4.54258695386237	5.96392067041154	4.69291160528579	5.22051235652374	3.97983584168637	2.63349908374298
ENSG00000198734	9.99104403477373	8.68161317563068	11.2606977234912	10.5260127846634	10.4443284744489	9.30430256486147	7.71478969445307
ENSG00000174175	5.34743160900742	4.97344299326954	4.06779570150376	4.75198616883089	4.84534622437235	3.39233067961497	2.82228974443749
ENSG00000000460	6.82007391844938	3.47751911661863	4.32839041862219	7.08888517601646	7.08935349463972	5.02976154714248	4.8889431722982
ENSG00000188404	12.947925943667	11.187920523883	13.1887026083702	13.1048582162589	12.7708721830797	10.8576933190116	10.595231091977
ENSG00000171806	2.87855725524597	3.71880372171819	4.69486477337447	4.69291160528579	3.7872620982143	4.3961429931308	3.51230070833696
ENSG00000000457	6.86007938844453	5.634190616605	6.79946001610653	7.99464871200819	8.08404666673777	6.58497700037952	6.41197222952541
ENSG00000075945	7.71350649952565	6.73394127233344	6.74468342508526	7.73396669279689	7.66067044892238	7.44387903116146	7.5103105730562
ENSG00000120370	6.78932456444327	7.2194218400429	7.66311514336689	7.18847812716085	7.23954229455248	7.19641176518763	8.04366844929875
ENSG00000076258	4.26814701610236	0	2.93355869889295	5.50220328921588	5.16437534212712	2.65026627927602	3.27433421141826
ENSG00000117523	12.9162565900967	12.905386957908	13.3677017465041	12.9569590937616	13.0675729943726	13.2976315197888	13.2927627351598
ENSG00000239373	6.43930617943557	6.89007976595666	6.14403055772711	6.41487475182742	6.02307450770863	6.22669423637243	6.94631399399563
ENSG00000117533	8.09085141331948	8.04771417168809	8.07192898882263	9.26202080514579	9.03126089299835	7.89146078179511	8.1836912061408
ENSG00000010165	6.77892739333279	6.08567826021284	5.96392067041154	8.0778156280057	8.04571620366595	6.28644387823637	4.66057284562319
ENSG00000197959	6.1149299711274	5.57405246995406	5.02412680010957	4.19354868309829	5.56209656824739	5.07564192260167	5.75276111173854
ENSG00000135845	7.52728841023694	7.80769703948299	8.37936237655358	8.12885467378559	7.81904818474126	8.30176481880224	7.21415659051322
ENSG00000094975	10.6242617993891	10.3938216118236	11.2728469910016	10.1690003001961	10.1449504583794	11.5333173383269	10.9101595286146
ENSG00000117586	4.58699099674475	4.41126059962802	3.08234782447163	4.19354868309829	4.17593646214101	3.77260308406909	2.41622991878119
ENSG00000203739	5.86263210543627	5.37695411708694	3.91741677817488	6.11077268077387	6.35943344131911	5.12010807646623	5.08605547994802
ENSG00000117592	10.0570697467392	9.79629435302928	10.5143331155017	9.94365265444718	9.74416753551705	10.4947591347157	9.85726874258218
ENSG00000076321	8.04386214771961	8.01415983163095	8.90160515320032	8.27195716991767	8.32073877071966	8.92960181278951	9.48528118211761
ENSG00000225591	2.87855725524597	4.10618459694941	3.45416131789444	3.0988763445592	3.14177849754872	4.53399259181824	4.2644254661366
ENSG00000200674	1.75821945050536	4.10618459694941	2.36455950793486	2.085159318413	2.58020695810024	1.03953588835187	2.82228974443749
ENSG00000120334	5.26042433317434	5.69192192306556	5.38092154114533	5.43168492472469	5.19271687701898	5.66139660513946	6.15525218943948
ENSG00000117593	7.28431274662852	5.99685027579024	5.40937527483834	7.86015371922795	7.8053475148981	6.05409110452312	5.65679018031309
ENSG00000270084	3.50150062063204	3.18761300887002	0.871836374156443	3.0988763445592	3.85975436971083	2.3846756967756	1.45159216230282
ENSG00000234741	9.53228462992719	10.1581381157322	10.5184207566168	10.1305600206973	9.99409576855243	9.91556209485313	10.0966872933529
ENSG00000208317	3.16070707689657	0	3.83590915873503	3.0988763445592	3.71093363876742	2.65026627927602	3.27433421141826
ENSG00000185278	9.3458734312564	7.82069518145086	8.80585681952534	10.2709792063569	10.4115454072734	9.02623065245922	9.26089448979367
ENSG00000135870	11.5066095869015	11.7743481174489	12.7248494948057	11.7280593361651	11.7196594120364	12.2622563413363	12.5914927961777
ENSG00000236535	7.34195357364416	8.83041149092945	7.16750257661935	6.96951217841885	7.02775812868656	8.49564760009558	8.20080762939551
ENSG00000224977	5.4558356869199	7.11777177164864	6.62846611780776	6.06491439370977	6.06966441788357	5.28541649545005	5.08605547994802
ENSG00000152061	11.2267204245157	9.19227712170157	9.24332460957223	11.2672348332164	11.3537294705119	9.61901183617029	9.95634081347024
ENSG00000203737	5.99428924190152	3.47751911661863	3.99456469172968	6.19833507676299	6.78875886043445	3.77260308406909	4.38912753927669
ENSG00000237249	4.26814701610236	3.18761300887002	2.93355869889295	4.56696956045767	4.77210756444987	2.65026627927602	3.80871760677765
ENSG00000223525	4.99893777460154	3.71880372171819	3.83590915873503	4.75198616883089	5.300823246423	4.16100570988994	4.32812344090413
ENSG00000229531	2.52747258896495	0	2.36455950793486	2.67928097903747	2.39747163545167	1.63743986325387	2.16033764350512
ENSG00000116161	8.16058833416228	7.403469877273	7.63326992936038	8.34572436663021	8.27176336462742	8.04349763616573	7.98559525517527
ENSG00000120333	6.14762366665857	4.97344299326954	4.98685043944224	7.06578770507949	6.97161678325154	5.90957419091793	6.62983740905656
ENSG00000235750	8.94906901803819	8.13355471168283	8.63867331525834	9.76517474402194	9.51926063699178	8.83939339718024	8.97530537577995
ENSG00000227740	4.88721545208304	0	2.93355869889295	3.80455730830565	4.11800203082925	2.3846756967756	3.61801924029512
ENSG00000143207	11.205041719163	10.6410074129593	11.1470171336991	11.3520179617239	11.3897512185249	10.959090856532	11.3491989759035
ENSG00000252906	5.84280339236809	5.14860253177577	5.38092154114533	6.08802573911961	6.20103445575336	4.98237402963518	5.7757884719178
ENSG00000236021	3.02651875438447	3.47751911661863	4.64787469213644	2.41258988407027	4.33696559891426	3.39233067961497	4.05449043122323
ENSG00000242193	7.1535995006898	6.78788698201087	6.43444557919992	8.01287822694986	7.80075155838072	6.88469384480778	5.65679018031309
ENSG00000075391	7.00985246699759	9.73582234695592	9.25708892110511	7.65877995276942	7.75871549285743	8.05499568646802	6.53854060654579
ENSG00000116191	7.51481145667736	6.73394127233344	7.79835862546342	8.09503005122243	7.86379960779774	7.67753848325451	9.02660420042731
ENSG00000116199	9.45275605411016	8.5236551741023	9.40572112836878	9.58398700046471	9.26442916362782	9.43765112606785	9.40447731042156
ENSG00000186283	9.26437006468631	8.62345941725943	8.9843169984145	9.4274438832639	9.23747488700734	10.1058504145792	9.04567662451333
ENSG00000143322	9.13379245079004	8.99425916774173	10.6116727723323	9.20237806563624	9.28102338649423	9.48729641198524	10.5145360318902
ENSG00000057252	11.2848247816667	11.635966860368	11.4566207325344	11.5276381595665	11.4927152887645	12.0989788294471	12.9069921615839
ENSG00000162779	5.67352468514164	5.69192192306556	6.10976262264049	5.19674137596824	4.69495116024669	3.65663697628436	5.01041068592179
ENSG00000169905	10.7460212289933	11.3658358477651	11.5345738031322	10.6679400589771	10.5175772540573	11.0933955277051	11.9342969732269
ENSG00000272906	5.4558356869199	6.46260033370346	5.92503419001442	6.3589674045682	5.82003259011098	5.53572172234859	5.22639460102414
ENSG00000143337	10.6846862157223	10.5207120889658	11.3872366370227	10.7215736489365	10.4999651996659	11.4820662761972	10.0631522872658
ENSG00000264916	4.32642440952544	4.2667716376633	3.83590915873503	3.56202644573208	3.54497674419106	3.87993720504894	4.1279158850238
ENSG00000260360	2.52747258896495	2.82441493502978	4.06779570150376	4.91594990284807	4.11800203082925	3.23947903556953	3.71651699463577
ENSG00000135837	11.2405204907165	10.5424519444883	11.5015027287432	11.9177747760614	11.8502182088612	11.3031928777408	12.3346970753651
ENSG00000235145	4.92542564221765	4.77403976778885	5.78003182925904	5.23865266772122	5.76447018094422	6.09921611626511	7.02530292443521
ENSG00000116260	12.3445932622004	13.2832977570705	13.4472583643927	11.2954326435181	11.2796959753435	13.5294790976076	13.1049408847614
ENSG00000121454	3.77697631888484	5.57405246995406	6.46187280769927	2.085159318413	0.775231766808725	3.23947903556953	7.59690385409641
ENSG00000230124	6.50386185197481	4.41126059962802	5.4372786629689	7.18847812716085	7.56091937037609	4.71883234332833	6.70374151089645
ENSG00000135847	7.98175518546093	8.01415983163095	8.20367460279754	7.97618590272252	7.8099288766767	8.26758161342222	8.01492403701233
ENSG00000143324	9.86768765985319	9.22686474398138	10.105342532167	9.98886602144745	9.86245870717656	9.75740464472302	10.4842743851023
ENSG00000272292	3.69086607913953	3.47751911661863	3.45416131789444	2.67928097903747	2.74237703473556	5.1632445922549	4.50390308473326
ENSG00000135835	3.59928809165048	4.66294991359728	2.36455950793486	3.0988763445592	3.54497674419106	1.03953588835187	3.61801924029512
ENSG00000243155	4.48833717165801	5.06367942570183	2.36455950793486	4.69291160528579	4.94867227456321	3.65663697628436	4.75630063197813
ENSG00000232586	4.07770084731778	3.47751911661863	2.93355869889295	5.46737492781417	5.44916180219155	4.07326276388756	5.60629937335222
ENSG00000135823	8.85569049356693	8.28191435782007	8.99139245959546	10.0010932951512	9.98905456751625	10.0961441057552	9.96011535452617
ENSG00000153029	9.83919844996788	9.31217397513362	10.1204810741699	10.3989353135521	10.1913374669313	9.49364773473533	9.00970645832397
ENSG00000162783	12.0914067987839	13.432319558551	12.1684523865877	12.0253254555081	11.7651929218099	13.264123255179	12.5172163126891
ENSG00000272198	5.99428924190152	6.28641389541695	7.17580803941611	8.50874787759078	8.38047899925351	6.691951849183	8.33863878663488
ENSG00000237292	3.77697631888484	1.59824879552092	3.21721640213654	3.80455730830565	3.85975436971083	1.03953588835187	4.1977846616995
ENSG00000135821	14.3751785403044	15.0416873943731	15.5443021632838	13.4301488267579	13.3809051265544	14.6945055513756	13.0669395168837
ENSG00000135828	7.06223763325516	5.228803390048	4.32839041862219	8.38823953315193	8.27839027866507	4.98237402963518	3.61801924029512
ENSG00000135838	9.78956651350571	10.4111127231725	10.8899061552518	10.5789740523933	10.6351855133861	8.80915748965845	9.09228291628863
ENSG00000135829	11.4791762531538	11.9780690585667	12.7495768898894	11.5084935892279	11.3977621731346	12.0602789982833	11.6898921795876
ENSG00000135862	6.74727859488482	8.8994251601736	8.81917316079232	4.0121238580642	4.05764343471017	4.59827337071226	4.8889431722982
ENSG00000232860	4.72337138775065	5.06367942570183	5.06046422335979	5.50220328921588	4.91504584779566	3.39233067961497	4.05449043122323
ENSG00000116698	10.8150672689063	10.7689037453924	11.3510225656046	11.2634331378472	11.2458607552192	11.312204316569	11.9195103655368
ENSG00000116701	13.0976611895768	12.1667663187542	12.044108237013	13.3865401614281	13.3433757395601	12.8764783048776	12.0743812722621
ENSG00000162704	11.6103070311386	10.0156316472707	10.8107885380543	11.9080675880647	11.4091297762378	10.5373948435643	10.15163654601
ENSG00000143344	7.66915657008145	6.76116625686587	11.1262754462596	6.96951217841885	6.97977197610917	8.53723301338349	7.73842617228816
ENSG00000198756	2.87855725524597	0	2.58013212780751	4.10568625799139	3.7872620982143	3.87993720504894	0
ENSG00000198860	7.27694298062558	6.16935279751104	8.00824455491464	8.07203153685913	7.73963229715164	7.94187732705552	6.2238402311305
ENSG00000116667	5.92053369384829	3.71880372171819	5.09590885028622	6.19833507676299	5.80174852339161	4.7755329522519	5.7757884719178
ENSG00000116406	9.63529711338979	8.17463265591734	8.9041067715684	10.6182013195815	10.3933446928138	8.97267537003447	9.78817104964222
ENSG00000135842	10.4426979240644	9.03943651663332	10.1534473400703	10.2583008284579	10.1358563158539	9.7887329684105	8.88288425135139
ENSG00000121481	8.52337284771132	8.32816057182387	8.98667934317756	8.73424137113884	8.59740260362121	8.90121674514553	8.20505519226568
ENSG00000121486	7.64645964013914	7.97980646069189	6.46187280769927	8.35528104649437	8.18272330125813	6.55289702595374	5.63176564744481
ENSG00000116668	6.77892739333279	6.42904243238721	6.71079054813194	7.52968384993895	7.26645833070927	6.18544054593997	6.66726263856125
ENSG00000116679	13.2563254507188	13.0824336688797	13.5685196607161	12.490196643348	12.3688663124589	13.2449565317347	12.6989271609678
ENSG00000273004	6.32960421940968	6.61959308374914	6.05678446539218	5.63367220648624	5.62584377668664	4.93337697972829	3.97712668115064
ENSG00000047410	11.0772259028018	10.1555755705136	10.8631558469181	11.0327612052574	11.1269773376997	11.3970950156573	11.0988844498603
ENSG00000157181	9.14395576653891	9.10465585784781	9.25708892110511	8.9355925627632	8.93178204662204	9.67783213562986	9.59454538241115
ENSG00000262180	6.74727859488482	6.58953156334761	6.24220556828899	5.66474922567674	6.22867166761495	6.99625261872009	6.91554138853833
ENSG00000073756	12.6076915945942	9.96091135504431	10.6329428281779	8.90988255418601	8.69969070812906	9.04364955055471	9.17688971523802
ENSG00000273129	5.34743160900742	5.634190616605	4.82729547021179	4.49962036183748	3.25362320518174	3.23947903556953	3.71651699463577
ENSG00000116711	7.28431274662852	5.57405246995406	8.13292066749602	8.16190439632172	8.25506166732881	7.19641176518763	9.57826477529901
ENSG00000150681	9.51045494172971	8.4078421743518	8.25553195478238	10.2169646605911	9.98804421000397	8.06640282322496	7.153911008944
ENSG00000090104	8.21559086864714	10.7705793628963	11.4364560811075	6.95701311859373	4.88061691203016	10.371428297753	7.41084976175075
ENSG00000127074	4.26814701610236	7.2194218400429	5.32227308575772	1.0573276937661	0.775231766808725	6.36244539804985	0.901145829698065
ENSG00000116741	13.86669957243	13.3388483103918	13.3229472144896	13.570091941598	13.1069643214372	12.6188589517228	12.2312473147015
ENSG00000234473	2.52747258896495	0	2.7676411147326	5.10907919827554	4.84534622437235	1.63743986325387	4.7092305767412
ENSG00000116750	7.70254617631245	6.83988803350887	7.6807303398021	8.54677967677739	8.64689460444095	7.53701721156751	7.99052497759789
ENSG00000116747	10.1294420379421	9.9842049382456	10.5085908906378	10.3555488908185	10.0772060936615	10.4122316217494	10.3669139300626
ENSG00000272579	3.02651875438447	1.59824879552092	3.45416131789444	4.0121238580642	3.54497674419106	3.77260308406909	4.1279158850238
ENSG00000023572	5.29001363955669	4.54258695386237	5.82296926318515	5.63367220648624	5.72620298138688	5.43371565683224	5.79845405129656
ENSG00000134371	10.3297063389474	10.2207656649629	10.9874967003735	10.1931818012703	10.1119397146332	10.5312336280943	10.1001123540896
ENSG00000221680	3.50150062063204	3.18761300887002	2.7676411147326	1.66090413924776	2.88814603455711	3.53052810100398	3.61801924029512
ENSG00000066279	5.71774257115249	5.80088446224794	5.88507045799159	4.75198616883089	4.52703367828901	5.50251466960418	4.32812344090413
ENSG00000177888	7.32060722830872	6.24843920504504	7.94161857148912	8.41132868739859	8.29809031371444	7.59330194178315	8.29547078972445
ENSG00000213047	9.34763333286496	9.52963175347286	11.0700176778942	9.3045720361345	9.23236441200164	10.370278233458	10.6429764386032
ENSG00000207139	2.52747258896495	0	3.91741677817488	1.66090413924776	0.775231766808725	3.77260308406909	3.27433421141826
ENSG00000233040	5.86263210543627	6.28641389541695	6.91311286221732	4.86333897989	4.73404509862801	6.89752388870145	6.48365397340979
ENSG00000203724	2.06249186112524	3.92545733628	2.7676411147326	2.41258988407027	2.58020695810024	2.3846756967756	2.16033764350512
ENSG00000151414	9.97291463295363	8.01415983163095	9.79213980381414	10.6660214855814	10.4092828355493	9.17591065446108	10.1756428683441
ENSG00000081237	14.3214528639321	12.9310859841681	14.7295462912728	14.7710620054484	14.718866432033	13.545106491607	14.5037853932469
ENSG00000229989	8.42344985013807	8.7713820784293	10.2656693373157	8.98567758445604	9.1766956630759	9.50417152930211	9.66869548880869
ENSG00000203721	1.37213626134902	0	3.21721640213654	4.10568625799139	4.88061691203016	3.06849264354608	5.70557352098211
ENSG00000162702	9.87746653407481	10.3202207378966	11.4604501024242	10.2684524285018	10.1851792582365	10.9567941163145	11.0501352659129
ENSG00000118193	5.73935346350372	6.67789978807748	6.21021716803673	4.42897248668723	5.22051235652374	5.39804537877541	4.05449043122323
ENSG00000118197	8.98569580115202	8.84956317126035	9.63986729462139	8.67442035036695	8.72173924898318	9.18901549489424	8.1399900499606
ENSG00000118200	7.13741282843615	6.91453564667503	9.44919454655102	7.08888517601646	6.95516678304607	7.06610373339848	7.29607886010553
ENSG00000116852	10.8390364267919	10.6537748195016	9.97339435431032	10.1891795931918	10.4458010589944	10.6825216159203	11.3805203017976
ENSG00000116857	7.81875991180422	7.35067805578218	6.33412333895094	7.60371608011078	7.69574918499996	7.04319375939005	7.79587671287414
ENSG00000174307	2.87855725524597	0	3.99456469172968	2.90427965831286	1.9433062058776	2.65026627927602	4.8889431722982
ENSG00000159176	9.72874337253094	9.31217397513362	9.47970362909894	9.75618512071332	9.473791058124	9.17854116296373	9.72893242870536
ENSG00000224536	3.50150062063204	2.82441493502978	0	3.0988763445592	3.54497674419106	1.63743986325387	1.84905688366074
ENSG00000223396	4.76610961001424	4.41126059962802	2.93355869889295	5.10907919827554	5.58366012892633	3.06849264354608	3.13880429617032
ENSG00000269690	4.14401582757003	4.10618459694941	3.559477134893	4.27636593605377	4.48181229406492	1.03953588835187	2.98920973011426
ENSG00000134369	8.75849551132302	7.84634532933137	8.00358626049324	8.49151760621304	8.70215725232734	7.8655760393103	8.166369269517
ENSG00000231871	4.38243881584995	4.2667716376633	4.54903767577975	3.91207030110164	3.99464891084152	4.16100570988994	3.97712668115064
ENSG00000198700	10.0473564744059	9.39271911262285	9.95300179964427	10.3709418886237	10.6183071813068	9.89651523610578	10.388550255188
ENSG00000198892	5.67352468514164	4.66294991359728	5.46465259151805	3.91207030110164	3.63034018261103	5.46852523391801	4.97104699371942
ENSG00000134375	9.2170183263909	9.07241469896687	9.14311206262877	8.6080194716408	8.46714343422768	9.33292143218948	8.96281773298375
ENSG00000176393	11.3255782755898	11.6496895507234	10.8955743984429	11.1805202603699	11.1456730046529	11.2843889385887	11.2018341836122
ENSG00000163435	7.71895559338557	8.00279935725202	7.480733868295	7.14506104684761	7.42417967544653	9.06370930022134	9.55515878600082
ENSG00000143862	10.320774646692	11.6953938447407	11.5272899114297	10.2326048439269	9.97993577547953	11.4719156177267	11.0148824763051
ENSG00000143851	9.73144186828005	11.5261846304864	11.4251788856418	8.17275483764654	8.05346420047334	10.4681295283197	10.2860205096168
ENSG00000243323	5.69580302854551	3.47751911661863	4.54903767577975	5.63367220648624	5.60490612578676	5.20512868499163	6.15525218943948
ENSG00000133067	3.59928809165048	4.10618459694941	2.93355869889295	4.96670956938878	5.10596522064134	4.83008913572637	2.16033764350512
ENSG00000077157	9.7634361500131	8.4078421743518	8.9239650760889	10.2300098929705	10.4421167754892	9.41997480874337	10.897092452943
ENSG00000232626	4.43635943476301	2.3378570285089	4.06779570150376	4.75198616883089	4.33696559891426	5.66139660513946	6.20699649028262
ENSG00000117139	9.78047462361947	11.3446192494635	11.8992766833051	10.0101962200948	10.0791051195649	11.3771950453756	12.0562748952867
ENSG00000235449	4.38243881584995	3.71880372171819	5.94460844478479	4.27636593605377	3.71093363876742	5.43371565683224	6.32097068594381
ENSG00000228288	2.31363461767247	0	2.58013212780751	2.67928097903747	3.25362320518174	2.3846756967756	2.41622991878119
ENSG00000183155	8.11997598584609	7.43762086594757	7.89710341763474	8.00682727962949	7.95348843568463	8.48293458289185	6.48365397340979
ENSG00000117153	8.66278356096082	7.7545007440516	8.3612698701372	9.07224883969536	9.05268054217217	8.29693081257595	7.55758247780517
ENSG00000159346	11.7101295585794	12.0328527081717	12.4043006425373	11.3309820114645	11.150647967367	12.2318691538007	12.5363050415342
ENSG00000159348	8.75319400373734	8.38176758766562	8.68886371165597	9.10660545709994	9.07759137128138	8.78864233314113	9.69762182949156
ENSG00000163444	10.0000240126627	10.2570774376961	10.0878445644131	9.86555555371961	9.83012256974648	10.5063222233122	10.3197078152112
ENSG00000143847	5.03433527380244	4.87718372591781	2.7676411147326	7.34056140541658	7.73963229715164	3.39233067961497	5.49968587121579
ENSG00000133063	5.29001363955669	5.90219214593163	5.69012196495273	4.19354868309829	4.65476828368984	5.1632445922549	4.1977846616995
ENSG00000231507	5.71774257115249	7.07501778865465	6.17750338550684	4.69291160528579	4.52703367828901	5.39804537877541	5.35428423090093
ENSG00000233791	6.38549766001568	7.15929513062184	6.59169346077061	7.55478574433471	7.19119599489088	5.69117627324744	6.2893149401696
ENSG00000159388	13.2085834744973	12.6041385098662	13.2505829110326	12.7708820972465	12.4343088408202	12.9786853916244	12.3141988864931
ENSG00000058668	10.8912522835963	9.35747521791911	8.5519998027855	11.6569094785131	11.5139296658965	8.62470854785309	9.23204591954199
ENSG00000221643	2.31363461767247	3.92545733628	0	2.90427965831286	3.14177849754872	2.3846756967756	2.41622991878119
ENSG00000122188	4.6338982806241	4.66294991359728	4.94858532820136	4.49962036183748	4.38688123547116	2.3846756967756	3.89537809682773
ENSG00000058673	11.5512034824617	11.8412537735578	12.5447890542024	11.7044188971889	11.6669711095006	12.0419779419146	12.5067163845809
ENSG00000257315	9.25876923643246	9.21706688921794	10.5061229233393	9.9515498470606	9.68304825288868	9.95445331582463	10.7449546375954
ENSG00000182004	6.38549766001568	6.58953156334761	6.37797548106693	6.55416354686084	6.05430101640249	6.77772645525594	6.00744337156111
ENSG00000143842	4.43635943476301	6.28641389541695	3.65762523742616	3.27031744045796	3.99464891084152	3.39233067961497	3.27433421141826
ENSG00000143850	4.20741605952151	3.47751911661863	3.65762523742616	4.27636593605377	3.92877767610173	4.7755329522519	4.75630063197813
ENSG00000158615	12.2168225991346	12.5785404315826	13.2520565269801	12.3276710499165	11.8136168093411	12.3660028679119	12.5371475954387
ENSG00000133056	6.50386185197481	3.92545733628	6.24220556828899	6.85291966600736	6.99594535351344	7.01991409682096	7.18003919233345
ENSG00000198625	12.213448582122	12.8671342963162	12.6491368313257	12.3955308226594	12.5512773716672	13.1835897291103	13.1393336625378
ENSG00000240710	4.14401582757003	0	3.45416131789444	4.27636593605377	4.77210756444987	1.03953588835187	4.1279158850238
ENSG00000240219	4.20741605952151	4.10618459694941	3.559477134893	4.80873663814149	4.94867227456321	3.39233067961497	4.84606987040974
ENSG00000174529	4.5385071835112	0	4.20396899742703	4.27636593605377	4.88061691203016	4.8826572049622	3.80871760677765
ENSG00000117222	8.38626135877862	7.85900138994838	8.762399259263	8.97021198081346	8.62105794150961	8.99970150482366	8.37679213647991
ENSG00000133059	9.73144186828005	9.98709036878463	10.757140596193	9.58804564512809	9.59553901975502	10.64877167005	10.4587104694516
ENSG00000133069	4.14401582757003	4.54258695386237	3.65762523742616	4.27636593605377	3.14177849754872	3.97983584168637	6.80795026919743
ENSG00000163545	9.51672577322076	9.86064022639904	9.4746633761969	10.5789740523933	10.5356685351327	12.1930436941488	10.73176688841
ENSG00000235363	2.87855725524597	3.92545733628	3.08234782447163	3.27031744045796	3.25362320518174	2.87448177217153	1.84905688366074
ENSG00000117266	7.34899940684348	4.87718372591781	5.16428799167219	7.08888517601646	7.31882918828969	6.36244539804985	6.44107369323768
ENSG00000158711	10.7926324620223	10.9498717786683	10.8848489526816	11.1717579383423	11.1136057433779	10.9598556247976	10.9880198802131
ENSG00000158715	4.67932834130867	8.21457329323426	7.36201553170787	3.0988763445592	3.02052882301288	8.32094048176358	6.25694898861024
ENSG00000069275	10.1150484742412	9.38836042389513	10.1887582452311	10.3531660919486	10.0714939715499	9.7679231894362	10.0678244102614
ENSG00000201944	2.06249186112524	0	3.74951942146031	3.80455730830565	3.02052882301288	3.53052810100398	4.61021658379842
ENSG00000117280	8.81046588889684	6.73394127233344	7.13379416662759	9.17025289865831	8.92757228770382	7.68495796289944	7.71478969445307
ENSG00000133065	6.82007391844938	6.16935279751104	6.48878832727597	6.11077268077387	6.17285744986775	5.98364145099753	7.2474857717212
ENSG00000229874	7.50222565583161	8.19474118843267	8.05401847446769	7.63543801193624	7.4941689529638	7.58539446281413	7.80709730254047
ENSG00000196550	5.92053369384829	7.403469877273	7.58419494620465	4.86333897989	5.04509010912583	5.02976154714248	3.97712668115064
ENSG00000163486	11.2912403160054	10.2522883497166	11.3939267263854	11.2410546680446	11.4526268683098	10.6034864492604	11.3279338219741
ENSG00000143466	9.28104325823576	8.34625180509887	8.57101606744493	9.84025704131952	9.89624177415441	8.12212358375261	7.99052497759789
ENSG00000261000	3.02651875438447	0	3.91741677817488	4.96670956938878	4.98153275333896	3.77260308406909	3.61801924029512
ENSG00000136653	12.9794826537185	13.4373390179505	13.037970110475	12.0215790936624	11.8147569630803	13.5599360621461	11.8160495120424
ENSG00000234981	4.32642440952544	4.41126059962802	3.08234782447163	2.085159318413	2.58020695810024	4.46671360872394	4.93057907059869
ENSG00000143486	8.42344985013807	8.55510598583127	8.50333274068389	8.63180559836436	8.43784350803977	8.60919335290588	7.57080904180184
ENSG00000143479	3.02651875438447	4.54258695386237	4.54903767577975	1.0573276937661	1.27675269354415	1.03953588835187	4.2644254661366
ENSG00000162889	12.4833328570562	13.9575322581725	13.6071281474383	10.7011085568249	10.5418784164981	12.7555050046084	12.0023825781645
ENSG00000136634	6.93690863809014	10.12184154008	8.35396885557145	3.42353226338762	3.02052882301288	7.51220633553167	5.01041068592179
ENSG00000162894	4.84796565750879	4.2667716376633	3.21721640213654	6.13316653185896	5.76447018094422	2.65026627927602	3.51230070833696
ENSG00000182795	3.16070707689657	4.87718372591781	4.69486477337447	2.41258988407027	2.18818721642471	3.87993720504894	6.61714343267108
ENSG00000180667	9.7461940417832	10.9704297563153	11.3890236964384	9.78828894010771	9.84023570348217	11.2535338804815	11.6354611909698
ENSG00000123836	9.2475019242287	8.77806144570287	9.15155871928577	8.58383459270091	8.77425828341582	10.3318024487532	9.90635138310098
ENSG00000196352	12.7021972221428	12.4625646584265	12.8673901304592	12.7903874836766	12.8288761627703	12.4462364110797	12.8628126865551
ENSG00000203710	11.3295910168522	9.91619552021374	12.3410857635031	10.8937624170163	10.9200607568392	10.0364935508656	8.89870480275237
ENSG00000117335	11.7210326376802	10.3270690608701	11.0716876541783	12.1096171925891	11.9985634928695	11.7046147983558	12.2176471295472
ENSG00000234219	5.84280339236809	1.59824879552092	4.49695825262468	6.65045916074506	6.73195457422353	5.56818160163491	6.76256187113569
ENSG00000203709	11.2848247816667	10.8151006909854	10.4753323633282	11.1403183571089	11.379385621745	11.35991669084	11.9387673283021
ENSG00000076356	8.83827120795452	8.06965786667644	8.69465529328571	8.68960975187476	8.92967870266276	9.4766483404317	9.12851337526432
ENSG00000196878	10.5126065398235	11.5949438299125	10.4352479303731	4.63131443218978	4.33696559891426	10.1237049741178	8.42492930270883
ENSG00000123689	13.6124333477773	14.744237079415	12.9313309177165	6.15521808676479	6.05430101640249	13.0711231489355	11.1499010188406
ENSG00000009790	10.5451803723619	10.6188540767066	9.75381913320877	11.3609403132822	11.5393267858648	10.2059436148563	10.551700211108
ENSG00000162757	2.06249186112524	0	3.559477134893	3.80455730830565	3.35741753305583	3.53052810100398	3.97712668115064
ENSG00000117595	2.31363461767247	0	3.08234782447163	3.42353226338762	3.63034018261103	3.65663697628436	3.97712668115064
ENSG00000117597	7.43759506193516	5.51129803534179	6.40648680720027	7.96374477788191	7.96995747511987	7.28695729539941	4.75630063197813
ENSG00000054392	5.88219197918911	5.37695411708694	3.65762523742616	5.96857858021218	6.05430101640249	5.02976154714248	4.61021658379842
ENSG00000200972	2.31363461767247	4.97344299326954	4.20396899742703	4.0121238580642	3.02052882301288	4.07326276388756	3.71651699463577
ENSG00000117625	10.233998101184	9.86064022639904	11.1942852923435	10.836061139435	10.9592539782972	10.8861345800365	12.3551470060893
ENSG00000082512	6.79964734135672	8.98851121440328	7.98952044498642	7.14506104684761	7.66573422012348	8.02607689266124	7.65394665843085
ENSG00000153363	5.29001363955669	4.41126059962802	4.32839041862219	5.43168492472469	5.24778242517152	4.32194201456219	4.05449043122323
ENSG00000170385	10.1678015238654	10.6244243838138	11.8206854912879	10.7462994971422	10.5711844098133	11.2529099981441	11.9977993431593
ENSG00000123684	11.7325275787296	10.8879241257244	11.15701504272	11.8597865373065	11.7012824650958	11.2541574931425	11.295436573756
ENSG00000241395	2.87855725524597	2.3378570285089	4.06779570150376	3.56202644573208	4.28526085098457	3.87993720504894	4.05449043122323
ENSG00000143493	6.86007938844453	2.3378570285089	4.54903767577975	8.08357662199188	8.23476100974584	4.46671360872394	3.80871760677765
ENSG00000143476	4.43635943476301	5.228803390048	4.59930241668139	4.19354868309829	2.58020695810024	6.07683003226659	3.80871760677765
ENSG00000220749	4.76610961001424	6.08567826021284	5.56923232898555	4.69291160528579	4.17593646214101	5.28541649545005	4.7092305767412
ENSG00000066027	11.1491231924558	10.7418257587564	10.6605771477115	11.1347799742669	10.9883445871344	11.2403753577597	10.2172418729921
ENSG00000230063	5.53210714231874	4.54258695386237	5.26113905215424	6.4330392337477	6.67282169271259	6.22669423637243	6.35194672594708
ENSG00000201544	4.07770084731778	4.2667716376633	3.91741677817488	4.80873663814149	4.84534622437235	5.46852523391801	4.38912753927669
ENSG00000229832	4.80761810241189	4.87718372591781	4.69486477337447	4.80873663814149	5.19271687701898	6.22669423637243	4.75630063197813
ENSG00000065600	7.83390597739174	8.56286271487891	9.41452124431669	8.50874787759078	8.52680199273264	8.56162078852564	9.50780608010395
ENSG00000117691	6.95549325857031	7.96817111801115	7.22466109403551	6.79791391099977	6.49078064230945	7.20675761351333	5.98785525421123
ENSG00000260805	6.08147817304481	7.35067805578218	6.56664709348364	5.63367220648624	4.98153275333896	5.12010807646623	5.92744274820844
ENSG00000162772	10.7319411967791	12.0237482615283	12.0424060103507	9.76517474402194	9.31203604536234	11.1427244733265	10.5666320471411
ENSG00000162771	5.34743160900742	7.07501778865465	7.11663993847021	3.68838235732035	3.45424297564438	5.43371565683224	5.35428423090093
ENSG00000237980	4.72337138775065	6.04194781204247	4.06779570150376	3.0988763445592	3.63034018261103	4.07326276388756	2.98920973011426
ENSG00000123685	6.25654743399132	5.57405246995406	4.54903767577975	6.28088572428916	5.72620298138688	4.32194201456219	4.97104699371942
ENSG00000117697	7.66351572553618	5.80088446224794	6.94261588455501	8.58383459270091	8.47293268346521	7.52052412743807	7.81823129690877
ENSG00000203705	8.11997598584609	7.29588083459809	8.32812035154663	8.31666852157252	8.45549477282649	7.85245740047272	8.40660458988839
ENSG00000198468	4.20741605952151	2.82441493502978	2.11101898638035	5.15357600954391	4.52703367828901	3.23947903556953	3.13880429617032
ENSG00000162769	8.017571570271	8.45861878020003	8.2437292489641	8.11204148938598	8.27176336462742	9.11129522495792	9.64544202944855
ENSG00000174606	9.06699478594742	8.77806144570287	8.83761192954666	9.72335061499899	9.79473559916193	9.57176727653522	9.78391803840225
ENSG00000136643	9.93946292088408	8.61602256605888	9.53885189872694	10.2038003925796	10.103567643361	9.54551544315168	9.50608582658531
ENSG00000143499	7.44418997878095	6.55883029519823	6.60405544985893	7.73396669279689	7.80075155838072	7.34431047003393	6.8190777080575
ENSG00000152104	3.50150062063204	6.61959308374914	6.00178645424474	1.0573276937661	0.775231766808725	3.06849264354608	0.901145829698065
ENSG00000117724	4.99893777460154	5.69192192306556	5.73577719027462	4.19354868309829	3.71093363876742	4.3961429931308	3.27433421141826
ENSG00000136636	7.72438418330655	6.49539537033575	6.69931364132866	8.06622416260264	8.00234205761337	7.2272293592888	7.65394665843085
ENSG00000092978	7.4637957539417	7.07501778865465	7.79296949332088	8.30685172766798	8.28169235543847	7.43510601408695	7.42548519520039
ENSG00000067533	6.79964734135672	6.20943785841715	6.67608223907311	6.82567892375686	6.61116111125942	7.32544495172496	5.63176564744481
ENSG00000092969	3.9351600549912	3.47751911661863	3.08234782447163	1.66090413924776	1.9433062058776	3.87993720504894	3.27433421141826
ENSG00000143353	6.96469655624123	6.16935279751104	6.82080128505525	7.51270328041041	7.57713533396459	6.76378017095919	7.14509539046046
ENSG00000136628	9.57046312840925	7.6992676051042	8.00824455491464	10.1123585172593	9.82334088019583	8.68884771527251	8.43942331239721
ENSG00000162813	6.24148140536947	4.41126059962802	4.64787469213644	6.83936358835667	6.43255520952571	4.53399259181824	4.7092305767412
ENSG00000067704	9.43133991167278	7.97980646069189	7.85117087368959	9.738036061937	9.59686514144059	8.76082695462799	7.59042426664779
ENSG00000118873	9.77786638195747	9.78639007406936	10.8161116391041	10.2467942381923	10.3068548260095	9.86746499292077	10.5298554512877
ENSG00000222370	2.31363461767247	3.71880372171819	3.21721640213654	3.0988763445592	3.14177849754872	3.06849264354608	3.27433421141826
ENSG00000218283	6.37172599642593	7.67083727965373	7.55265314425832	6.53747033281226	5.74546345618019	6.81877420782221	5.60629937335222
ENSG00000213033	3.16070707689657	2.82441493502978	3.99456469172968	3.27031744045796	3.54497674419106	4.07326276388756	4.32812344090413
ENSG00000162817	4.84796565750879	0	2.58013212780751	4.80873663814149	5.35198297114132	4.65981180628129	2.98920973011426
ENSG00000186205	9.45928218487795	8.5858857709604	7.55901691411324	9.19972812224903	9.16243624234704	7.47844715069099	7.1092841540905
ENSG00000257551	2.31363461767247	4.97344299326954	3.91741677817488	1.0573276937661	3.14177849754872	2.65026627927602	2.16033764350512
ENSG00000136630	9.81268590625852	11.4445678457923	11.4981949362987	8.77753358664367	8.66723587800798	8.89162957852303	7.77888048374573
ENSG00000143507	8.58136200288101	10.89869063515	10.6116727723323	9.84195748059984	9.5942116779801	9.97729456124956	9.88665383690399
ENSG00000238042	4.67932834130867	0	1.41141623664498	3.27031744045796	3.35741753305583	2.87448177217153	1.84905688366074
ENSG00000143498	4.20741605952151	0	5.40937527483834	5.83834182127342	5.07584872236753	5.07564192260167	4.97104699371942
ENSG00000154305	9.94295963322292	9.08324200750812	9.6769107151184	10.1676449250989	10.2035755811822	10.3976298589716	10.7102630859314
ENSG00000272750	3.50150062063204	0	2.11101898638035	4.0121238580642	3.71093363876742	2.3846756967756	1.84905688366074
ENSG00000186063	8.03515174690535	6.5274614568234	6.72217687412481	8.37889940173907	7.97404552645226	6.81877420782221	6.85195415726246
ENSG00000162819	9.90641163862817	9.58400724109875	10.686965899865	10.5428383270063	10.4138044361727	10.5302041958484	9.99242087238522
ENSG00000197520	2.71366837669273	3.71880372171819	3.08234782447163	2.67928097903747	3.14177849754872	3.06849264354608	3.89537809682773
ENSG00000228106	4.58699099674475	7.403469877273	7.53339165637097	4.56696956045767	4.65476828368984	5.72035364995096	5.88571491467436
ENSG00000154309	4.80761810241189	0	2.58013212780751	5.72496432297004	5.99115713372447	2.05890482480417	2.63349908374298
ENSG00000187554	8.89954041222236	6.04194781204247	6.47539333497031	9.8040768658646	9.71393153219322	7.20675761351333	6.83011997799098
ENSG00000143502	3.39659994465825	0	2.7676411147326	2.90427965831286	2.18818721642471	2.3846756967756	0.901145829698065
ENSG00000162909	12.5585810382117	13.1490036264815	12.8228017283243	12.5389713725827	12.5409802155986	12.5978861554818	12.4155005061274
ENSG00000143514	10.9474584781219	11.2825579429203	11.6582802584381	10.4906777448322	10.5168768845336	11.4979496246426	11.2657530590847
ENSG00000272645	4.84796565750879	3.92545733628	1.80321559338192	4.63131443218978	5.37689821473237	3.39233067961497	2.98920973011426
ENSG00000232372	5.95788274631673	5.85242736401778	4.13748839636131	4.80873663814149	4.91504584779566	5.43371565683224	4.50390308473326
ENSG00000143756	8.87045571762565	8.79791598384907	9.90634849516696	9.1593835529188	9.11694486651828	9.45728149502098	9.94876197540775
ENSG00000143753	9.2131621860459	8.09127278792328	9.81358883018746	9.36021373223245	9.09082883708634	9.02914844645079	9.01697259590226
ENSG00000143748	8.26485262399952	7.65640922155412	8.13718011687407	8.03683137654444	8.23816435208941	8.17577204835957	9.18766173035383
ENSG00000143771	8.90672088386358	9.16705393438008	9.18073854896625	9.10093587168585	9.10767188982661	9.02330694538304	9.33058876928994
ENSG00000162923	12.4759094634853	13.2626093364934	13.7413635165618	12.4467165116209	12.4783241105478	13.171095863334	13.8839830433993
ENSG00000266618	2.71366837669273	1.59824879552092	4.44292819458115	4.19354868309829	3.02052882301288	3.97983584168637	5.35428423090093
ENSG00000143786	4.80761810241189	6.46260033370346	4.26752059213666	4.0121238580642	4.33696559891426	4.24371680643672	4.61021658379842
ENSG00000185842	4.92542564221765	3.47751911661863	3.91741677817488	4.27636593605377	3.71093363876742	3.87993720504894	2.16033764350512
ENSG00000143815	11.0281381482703	11.528167044848	12.287722312352	11.4483708884188	11.392044605378	12.1524755564745	12.2390356478435
ENSG00000143742	9.61644299689991	9.07241469896687	9.32960095728937	9.92291532596904	9.62703427288382	9.55769105856982	9.39335325542425
ENSG00000143819	6.87967366806782	5.69192192306556	6.07466088557628	7.44270889701058	7.38172755972955	6.79153921297475	7.38112581201178
ENSG00000242861	3.77697631888484	5.14860253177577	5.22957231153101	5.0157438459489	5.27454657842892	3.87993720504894	5.70557352098211
ENSG00000196187	10.1517742970149	9.73582234695592	10.0867438626571	10.647666646608	10.8428057355716	10.5167543002663	11.2375209120916
ENSG00000143811	7.60585997981563	7.72714848141846	7.28732706632893	7.88015212186534	7.87258569254784	7.54519358163213	6.77404354215773
ENSG00000143751	9.83794693503284	10.0436192212876	10.1815586648138	9.38141549393161	9.41034333034584	9.64015912839788	9.76246285860653
ENSG00000272562	3.8582351010964	0	4.64787469213644	3.91207030110164	4.61343406309207	3.97983584168637	3.27433421141826
ENSG00000163041	11.7844505863805	11.7583925910398	12.4654968025587	11.8509470468497	11.7018988163379	11.9856392007167	11.1630606204885
ENSG00000225518	3.16070707689657	3.47751911661863	3.45416131789444	3.42353226338762	3.92877767610173	4.07326276388756	3.39821835481663
ENSG00000182827	9.33171639325576	10.5167239490711	10.2964643248833	9.57583529588912	9.40126408929349	10.0263075262134	9.72450087525245
ENSG00000183814	4.99893777460154	2.3378570285089	4.06779570150376	4.86333897989	5.10596522064134	5.39804537877541	4.32812344090413
ENSG00000143799	9.60618778969292	8.55510598583127	8.37215257834195	9.59007069374943	9.56334082424137	9.63058513282536	9.73335041134738
ENSG00000143772	11.4176755152624	12.7981635367664	11.9275249150247	11.3218718532986	11.2660069050533	11.6258503043243	10.1669594451349
ENSG00000228382	5.19936041834003	6.20943785841715	6.39230157503434	5.81082177166205	5.97492968513291	6.07683003226659	5.38456055948192
ENSG00000143801	7.10448424849158	7.00841302452502	6.19395299981876	7.3114003322688	7.30591362130742	6.83220129873227	6.76256187113569
ENSG00000163050	10.1648099498641	10.1555755705136	9.74965232085246	9.9515498470606	10.108224790768	11.49373113392	10.7951241210366
ENSG00000143776	7.52728841023694	5.228803390048	7.76571766863921	6.8118632093904	7.21211452964344	5.98364145099753	6.25694898861024
ENSG00000181450	6.14762366665857	3.71880372171819	5.59423424097207	7.45164617186997	7.43608289483751	5.28541649545005	4.97104699371942
ENSG00000143740	7.4637957539417	8.30059110993435	8.09838462745254	7.478130531606	7.39398473646551	8.31138450934987	8.00033417350673
ENSG00000081692	7.37684359555517	7.23891981900778	6.50206009431387	7.37854799947414	7.76344711001356	6.97219659144678	6.96647035541214
ENSG00000143761	12.5619960353587	13.4982725527045	13.5912070802242	12.2410788295197	11.9717261463773	12.8748572870582	12.6277390317335
ENSG00000143793	7.45729005474287	8.63085812925533	6.42053392067172	7.24097418499898	7.10435002698595	7.35365151731474	8.53024314742215
ENSG00000162910	7.47027224794351	8.21457329323426	6.95231765719956	7.61171219306622	7.69078985555879	7.75007017783034	8.80667063002466
ENSG00000143774	11.1476086891375	11.6560490753854	11.0777944151099	10.2261086939408	10.4055039794783	11.0730404210411	11.2013027362298
ENSG00000198835	6.14762366665857	5.30477962313168	3.83590915873503	4.69291160528579	4.84534622437235	5.24583103298425	6.33654183999291
ENSG00000203684	3.02651875438447	0	4.38679567446152	4.63131443218978	4.33696559891426	3.06849264354608	3.13880429617032
ENSG00000181873	9.84419368118754	9.65829497435861	9.09356001172108	7.95119543270257	8.28827392148433	9.78528544996804	8.99260845140701
ENSG00000162913	3.16070707689657	4.2667716376633	1.41141623664498	1.66090413924776	2.39747163545167	2.65026627927602	5.01041068592179
ENSG00000154358	7.08773376147653	7.42064642058157	5.38092154114533	6.37784493806317	6.76063627385602	5.66139660513946	7.72665633902984
ENSG00000269890	4.26814701610236	6.35949002450787	3.08234782447163	5.50220328921588	5.90813060733689	4.71883234332833	6.04583934967861
ENSG00000269934	3.39659994465825	5.74743165100522	2.36455950793486	4.96670956938878	5.49540187313454	3.77260308406909	5.65679018031309
ENSG00000154370	10.3881633396573	12.6209549983286	11.1348209618996	10.0953508390161	10.2320183319595	11.4382867031303	13.1096214395974
ENSG00000231563	3.39659994465825	3.92545733628	3.08234782447163	4.0121238580642	4.52703367828901	4.16100570988994	5.47175430410685
ENSG00000181218	5.69580302854551	8.79132811793702	7.72667904153632	5.23865266772122	5.35198297114132	6.22669423637243	8.89345053847866
ENSG00000196890	5.73935346350372	7.85900138994838	7.09051998000221	5.35754171045242	4.94867227456321	5.56818160163491	8.17505623497986
ENSG00000168159	10.5274334841321	12.9426515039349	11.3934816843083	10.1010423720285	9.85250069533079	11.0116689919278	11.1879525251711
ENSG00000201321	3.28346946000656	8.20469131848613	3.65762523742616	3.0988763445592	2.88814603455711	4.8826572049622	3.13880429617032
ENSG00000234975	3.9351600549912	4.10618459694941	4.44292819458115	2.085159318413	2.18818721642471	3.77260308406909	3.39821835481663
ENSG00000116574	10.2945555828103	10.9601873853197	11.7831254546389	9.48734065956946	9.23577340597901	10.4905312908679	9.91933524043573
ENSG00000168118	8.28703363786696	9.05051321553591	8.71474467340005	8.41590250437036	8.24832647139484	8.92334210752513	8.6720020861753
ENSG00000237481	3.28346946000656	4.2667716376633	3.91741677817488	4.80873663814149	4.17593646214101	4.83008913572637	5.65679018031309
ENSG00000154429	9.67508796580646	9.061505517522	9.53724121724112	9.87056245360443	9.81196673796663	10.3919742085108	9.5129545675286
ENSG00000226920	3.8582351010964	0	2.36455950793486	3.91207030110164	3.35741753305583	3.97983584168637	3.97712668115064
ENSG00000069248	9.43796341875896	9.59161053173572	9.583236026048	9.60216165415664	9.58889006495099	9.62866268585097	10.0131591995124
ENSG00000223635	3.16070707689657	3.18761300887002	3.83590915873503	3.91207030110164	4.33696559891426	3.23947903556953	3.27433421141826
ENSG00000135776	9.31021690001328	8.15423988071435	8.22784058787657	9.3362849168982	9.23747488700734	8.73960773086124	8.76124131473856
ENSG00000135801	8.83074093041152	8.73064314079501	9.17246150365305	8.77397510912442	8.4408004236646	9.57176727653522	8.35019110845066
ENSG00000135763	7.87353491653805	5.99685027579024	6.89310357209209	7.85342550372041	7.70561699128877	8.27251479679078	5.96799751523785
ENSG00000143641	10.7932783217822	10.5754184881611	10.8528333492678	10.5799933187578	10.537050820574	10.3862962994929	10.0395619830084
ENSG00000177614	4.07770084731778	4.87718372591781	2.58013212780751	3.80455730830565	3.14177849754872	5.32394473428681	2.41622991878119
ENSG00000135775	8.74787294269334	7.82069518145086	8.58355573692413	9.19972812224903	9.05268054217217	8.53312800027662	8.09033862156314
ENSG00000119280	7.05363780176041	7.67083727965373	6.89310357209209	5.43168492472469	5.300823246423	6.94773263353757	5.60629937335222
ENSG00000143643	8.82063902649574	7.403469877273	7.01846248099199	9.68217742066574	9.83574972718129	6.88469384480778	7.75010076108005
ENSG00000173409	5.53210714231874	0	3.21721640213654	5.993272291738	6.05430101640249	3.39233067961497	3.13880429617032
ENSG00000182118	5.4558356869199	6.08567826021284	5.5178898648864	5.56943478105997	5.07584872236753	6.32494505256258	6.85195415726246
ENSG00000143633	6.21086896839416	6.24843920504504	6.43444557919992	6.61906940064924	6.39645754015496	6.16436273185934	5.32335888006843
ENSG00000116906	8.65427639453307	7.17961707397036	7.77120937112621	9.36731566243675	9.26942750259112	7.54519358163213	7.84024477500769
ENSG00000116903	9.57046312840925	10.1581381157322	10.2401551723045	9.35307666845505	9.37213030719117	10.2910574017189	9.83277308713279
ENSG00000010072	8.16058833416228	8.51568416159359	9.15155871928577	7.77726702912348	7.70561699128877	9.47022156894994	9.09686179475259
ENSG00000135766	9.9740544195101	9.50970433282709	9.52266358684587	9.78652401340633	9.54146907764041	9.71635778629845	9.44813513873205
ENSG00000233461	5.4558356869199	4.54258695386237	5.73577719027462	4.86333897989	4.52703367828901	4.59827337071226	3.80871760677765
ENSG00000116918	8.4694351108342	6.64904097498125	6.3041301054918	9.20502315052807	8.96296967488311	8.10009285082227	9.06916796436476
ENSG00000162946	9.38066991683836	6.32341459670417	6.96195462335213	9.11787822058652	9.11324282505483	7.32544495172496	8.32699321285883
ENSG00000226758	5.71774257115249	0	0.871836374156443	5.86534672500643	5.85591989942816	2.65026627927602	3.39821835481663
ENSG00000116991	9.23804480758278	10.1835162971093	11.6549421488078	8.91312147347643	8.96912710483815	9.29463537784565	10.1114708507779
ENSG00000212916	5.99428924190152	6.78788698201087	6.16086404731885	6.17693765232884	6.24229423746412	5.1632445922549	5.98785525421123
ENSG00000135778	6.80989678112999	6.04194781204247	6.57922462962528	8.00682727962949	8.05346420047334	7.23735731798202	5.60629937335222
ENSG00000135749	8.25738251619353	7.38608636561563	7.15914902304862	8.73424137113884	8.97321750646928	7.43510601408695	8.48554776768496
ENSG00000231940	3.39659994465825	3.71880372171819	3.21721640213654	2.67928097903747	2.39747163545167	3.53052810100398	5.01041068592179
ENSG00000143674	7.47027224794351	8.73064314079501	8.29037155231071	7.20970631916014	7.08179636319233	8.43093172277406	8.75546073076591
ENSG00000183780	3.28346946000656	3.18761300887002	2.36455950793486	2.41258988407027	3.54497674419106	2.05890482480417	0
ENSG00000231663	5.31900825339626	5.30477962313168	5.5178898648864	5.60191099361548	5.47246708580862	5.50251466960418	4.61021658379842
ENSG00000168275	5.62790857511648	6.04194781204247	5.80166027810763	6.24020076090736	6.00720408417128	5.32394473428681	5.22639460102414
ENSG00000059588	9.46253421301748	8.82397068058289	7.78756015477753	9.58195338836194	9.75845877105765	8.84271415779402	9.41184597927385
ENSG00000168264	13.4080327081826	15.3279023472495	14.9318821204672	12.3185398936961	12.2225530538782	14.0598472894508	12.7392075097677
ENSG00000228830	4.92542564221765	6.89007976595666	5.59423424097207	3.27031744045796	3.35741753305583	5.24583103298425	3.13880429617032
ENSG00000227630	3.69086607913953	3.71880372171819	4.13748839636131	3.42353226338762	3.35741753305583	2.3846756967756	2.98920973011426
ENSG00000238005	6.38549766001568	6.93858386384527	5.61881024029456	4.69291160528579	5.19271687701898	5.28541649545005	4.32812344090413
ENSG00000258082	7.92630611779496	8.20469131848613	7.24058461732912	6.11077268077387	5.78322975496594	5.8840152842654	6.52501346682731
ENSG00000173726	10.6657654367348	10.9863794208829	11.0172656504119	10.4466536555232	10.2079212987179	11.1045041992528	10.0095210894033
ENSG00000207181	4.43635943476301	4.77403976778885	4.20396899742703	4.56696956045767	4.57088056931403	4.65981180628129	4.97104699371942
ENSG00000188739	6.85018154000097	7.6992676051042	6.98103755939268	6.58698145166972	6.44438980708234	7.00813186587994	7.12730088478462
ENSG00000054267	10.9375600530943	10.9820469704061	11.4752462162114	10.7715012303413	10.9078250118176	11.5743453649003	12.265968400404
ENSG00000232686	4.76610961001424	6.49539537033575	6.03868375659619	5.31899045793984	5.13546586614065	5.24583103298425	6.96647035541214
ENSG00000263439	4.07770084731778	2.82441493502978	3.559477134893	2.085159318413	2.18818721642471	4.24371680643672	4.8889431722982
ENSG00000234086	5.4558356869199	3.92545733628	5.38092154114533	5.63367220648624	5.42547385521944	6.41692926732276	7.20570258189479
ENSG00000152904	7.43759506193516	8.04771417168809	6.92301439175112	8.40674032379544	8.04182654520013	6.83220129873227	6.9961865154407
ENSG00000227962	0	0	2.58013212780751	1.0573276937661	3.25362320518174	2.65026627927602	2.98920973011426
ENSG00000116957	6.30082390876616	5.06367942570183	5.54378948109294	7.46052842237274	7.54451906457671	6.60075339279275	6.41197222952541
ENSG00000162885	6.98292887225558	7.03095800415742	7.03681706304763	6.83936358835667	7.08935349463972	7.48696129477876	7.79023352181006
ENSG00000168243	4.26814701610236	3.71880372171819	3.74951942146031	2.67928097903747	1.27675269354415	3.06849264354608	0.901145829698065
ENSG00000143669	13.7052667637499	11.1420558797021	10.9625113031064	14.4754302066763	14.5770301418439	11.6610751776012	12.2039175153131
ENSG00000222831	5.69580302854551	5.14860253177577	5.06046422335979	5.81082177166205	6.18701474169348	5.72035364995096	6.32097068594381
ENSG00000252056	5.1026267004236	3.92545733628	4.59930241668139	4.75198616883089	5.32662987017613	4.24371680643672	5.60629937335222
ENSG00000116962	10.3544248497979	9.72203281655574	9.35725006212599	9.58398700046471	9.41636456899254	10.611295650609	10.354539623702
ENSG00000077585	9.31921399065221	9.75626261835367	10.441288996861	8.58383459270091	8.62626242261189	9.82276248485303	8.37302188746984
ENSG00000086619	8.35160110256858	8.97694614552986	8.57416121767993	8.59194135007717	8.81585033732886	8.60528834211788	9.47124285107226
ENSG00000116977	10.8490107695038	10.6262763837034	12.1021827834945	11.6241797788485	11.5591913581051	11.3347845139887	11.2799163210871
ENSG00000223776	4.20741605952151	5.69192192306556	5.06046422335979	5.46737492781417	4.33696559891426	3.06849264354608	3.61801924029512
ENSG00000273058	3.39659994465825	0	2.93355869889295	0	2.18818721642471	2.3846756967756	3.61801924029512
ENSG00000119285	9.43631039064476	9.03386611139491	9.60492632480653	9.62406861516863	9.58354874959746	9.82779838318112	9.03139599636753
ENSG00000077522	3.77697631888484	2.82441493502978	2.11101898638035	1.66090413924776	2.39747163545167	2.05890482480417	2.41622991878119
ENSG00000116984	9.6396132933094	8.33723454602895	8.19552847524148	10.0665514191148	10.3003576723443	9.5208515393437	9.42465127611971
ENSG00000226498	3.69086607913953	3.18761300887002	2.36455950793486	3.0988763445592	3.54497674419106	3.39233067961497	2.63349908374298
ENSG00000233355	2.87855725524597	0	2.58013212780751	2.41258988407027	1.27675269354415	0	2.63349908374298
ENSG00000091483	7.52728841023694	7.61223855308769	7.13379416662759	8.10072284741195	7.89431962141854	6.83220129873227	7.48956720264465
ENSG00000117009	7.36993276702052	4.41126059962802	6.8728128577023	7.84666576313449	7.82358631321334	5.66139660513946	4.66057284562319
ENSG00000054277	8.91386579432873	8.34625180509887	7.22466109403551	8.6080194716408	8.45256785197105	7.37215410468277	8.37679213647991
ENSG00000203668	9.33349363894804	8.21457329323426	8.68595917875575	9.37907507077964	9.26609720148543	8.8526308226024	9.96388004596725
ENSG00000174371	4.48833717165801	5.30477962313168	3.65762523742616	4.10568625799139	2.74237703473556	2.87448177217153	2.41622991878119
ENSG00000214837	4.962649881597	2.3378570285089	4.44292819458115	5.23865266772122	4.80919159114902	5.63098925509111	5.12244070691391
ENSG00000143702	10.4960396064905	10.9063321016399	11.6763201417979	11.1326975869496	11.0316450287442	11.176014600299	11.773066544514
ENSG00000054282	8.49824138234374	8.1230998355443	7.43993957116394	9.04593356343645	9.38600388174216	7.68495796289944	7.46143711345462
ENSG00000117020	8.29799755692176	8.35521305360624	8.68595917875575	9.29963066032573	9.279372527088	8.20186624541896	9.2588528994388
ENSG00000232184	3.28346946000656	0	4.98685043944224	3.80455730830565	4.05764343471017	2.65026627927602	5.04872881135868
ENSG00000228939	4.43635943476301	5.37695411708694	6.00178645424474	5.19674137596824	5.27454657842892	4.59827337071226	6.2893149401696
ENSG00000179456	11.2161626407965	11.2360150934665	11.3908085449705	10.8597550667108	10.8270716177075	11.4868496687433	10.7880629848822
ENSG00000225401	3.59928809165048	0	3.65762523742616	5.0157438459489	5.07584872236753	1.03953588835187	4.80188335580512
ENSG00000035687	9.79086069019357	8.68161317563068	9.41100763675718	10.2416505911199	10.2354281428337	9.13044218502757	10.3352925321313
ENSG00000179397	4.88721545208304	4.41126059962802	4.78448852620561	4.75198616883089	4.77210756444987	3.39233067961497	3.27433421141826
ENSG00000121644	9.22661382387648	9.81265186874566	10.2332081741431	9.25693125531145	9.22036909559325	9.78182967346787	9.97387145812106
ENSG00000203667	8.41675921849376	8.4078421743518	9.2803835982368	8.40674032379544	8.37430578526252	8.20186624541896	8.34635060365421
ENSG00000188206	8.27228425161305	7.88398522699462	9.69001688381463	10.5553299470904	10.7493015423533	8.76433334668571	10.846329311689
ENSG00000153187	12.8664892980403	12.8749442908308	12.8035016283	13.2609288444077	13.2646290901668	12.4818140813897	12.716885896771
ENSG00000273175	4.92542564221765	4.41126059962802	5.13050350220326	5.81082177166205	5.32662987017613	3.97983584168637	3.61801924029512
ENSG00000272195	7.1535995006898	8.30983959248322	7.24848095275381	7.35015223333218	7.19820259511402	6.85868630165866	6.83011997799098
ENSG00000203666	9.46415748227148	9.73924923335172	9.25316964249096	9.37673084468799	9.09646506490662	8.165200768225	8.09033862156314
ENSG00000185420	7.39056672535628	5.90219214593163	5.61881024029456	7.46052842237274	7.75871549285743	6.266801002692	6.44107369323768
ENSG00000230184	5.67352468514164	4.77403976778885	2.36455950793486	5.35754171045242	4.38688123547116	3.87993720504894	2.82228974443749
ENSG00000162851	6.97384151582512	6.20943785841715	6.74468342508526	6.60311463552271	6.40859072937429	7.17549479620063	5.86438949997372
ENSG00000162852	8.95138563699046	9.1972692692669	9.3950896397425	8.98875090940823	9.17314399908614	9.27510447306213	10.0713185998211
ENSG00000225300	5.4558356869199	5.85242736401778	4.82729547021179	5.06316618343512	5.24778242517152	6.45214130295204	6.04583934967861
ENSG00000143653	7.22427277562482	7.45439791385798	7.77120937112621	7.95119543270257	7.63508150858147	7.19641176518763	7.17138226926789
ENSG00000260855	3.77697631888484	2.3378570285089	4.59930241668139	5.15357600954391	5.62584377668664	3.65663697628436	5.01041068592179
ENSG00000227953	3.59928809165048	3.47751911661863	3.99456469172968	4.10568625799139	3.7872620982143	2.05890482480417	3.51230070833696
ENSG00000153207	12.0821870215236	13.090841019843	13.4161573660583	11.162942072292	11.0472502899725	13.266906904587	13.1035195316015
ENSG00000135747	4.14401582757003	5.80088446224794	5.4372786629689	5.10907919827554	5.10596522064134	4.59827337071226	4.2644254661366
ENSG00000197472	3.02651875438447	4.87718372591781	4.54903767577975	2.085159318413	1.64818696484463	5.07564192260167	3.89537809682773
ENSG00000188295	7.00093364672915	8.20469131848613	7.98480119892569	6.61906940064924	6.73195457422353	7.29667589536822	7.70282463272087
ENSG00000196418	9.62952204631733	10.3429231824114	10.395796553016	9.74168418482424	9.69052075644595	9.81770894653145	10.6754822284784
ENSG00000215795	1.37213626134902	0	2.7676411147326	2.67928097903747	2.74237703473556	1.03953588835187	3.51230070833696
ENSG00000259865	7.17754400121319	5.44568927656727	5.13050350220326	7.35967972363885	7.3123858578975	5.1632445922549	6.69168408333522
ENSG00000227671	9.95916649121814	9.21214289556298	9.499690376723	10.2169646605911	10.4443284744489	9.26028079714115	10.4990521940595
ENSG00000252516	2.52747258896495	3.47751911661863	1.41141623664498	1.66090413924776	2.74237703473556	1.63743986325387	3.51230070833696
ENSG00000162714	9.82031076563777	10.6628257113551	9.88117443193743	8.8870042016513	8.91274063561559	10.3552433663433	10.2505006684975
ENSG00000162711	13.4350812408679	14.2448642397219	13.0042641309226	11.3040940675265	11.2215659678412	13.3257885590617	12.3558634990655
ENSG00000162722	6.34378189757991	6.42904243238721	4.44292819458115	5.75415489579135	5.07584872236753	5.85799539478879	7.59690385409641
ENSG00000238243	3.77697631888484	2.3378570285089	2.11101898638035	2.90427965831286	2.74237703473556	3.06849264354608	6.06466081336101
ENSG00000175137	9.63385551243434	9.87939736735868	9.91381584634318	9.54275992034843	9.66924732248989	8.80915748965845	10.378242922092
ENSG00000264500	2.31363461767247	4.41126059962802	3.08234782447163	2.90427965831286	2.39747163545167	1.03953588835187	1.45159216230282
ENSG00000171161	9.53228462992719	9.74948132151446	9.69868864738875	9.55110012510858	9.50096110980169	9.07786882619427	8.42856647926872
ENSG00000171163	7.0275263826507	6.24843920504504	4.38679567446152	7.85342550372041	8.09159205057072	4.83008913572637	5.41421454850831
ENSG00000227237	3.8582351010964	0	3.65762523742616	1.66090413924776	2.58020695810024	3.06849264354608	3.27433421141826
ENSG00000185220	5.69580302854551	0	3.74951942146031	6.37784493806317	6.67282169271259	4.32194201456219	3.80871760677765
ENSG00000035115	6.62490437107333	5.99685027579024	4.32839041862219	7.06578770507949	7.3878691652222	4.93337697972829	6.17270731322153
ENSG00000143727	8.49188951125477	8.5236551741023	9.15155871928577	8.89029483435722	8.54340378333127	9.1573615619878	8.55041385074847
ENSG00000151353	8.3124876961788	8.48335226822346	8.37936237655358	7.52968384993895	7.74442681279269	8.38155755953549	7.41818603705758
ENSG00000233296	2.31363461767247	5.99685027579024	4.13748839636131	2.90427965831286	3.02052882301288	2.65026627927602	2.98920973011426
ENSG00000032389	7.4637957539417	5.85242736401778	5.61881024029456	8.0778156280057	8.16137103254307	5.85799539478879	5.63176564744481
ENSG00000224885	3.50150062063204	0	1.41141623664498	3.0988763445592	3.63034018261103	2.65026627927602	2.16033764350512
ENSG00000171853	10.1568019583845	8.02543154665148	7.42608104428817	10.5004007202503	10.6970859947809	8.80575849169482	8.2673121096308
ENSG00000182551	9.39945618522505	8.24381946552907	8.43923312611478	9.09524391767673	8.88478495338462	8.62470854785309	8.12661733139185
ENSG00000242282	2.87855725524597	3.47751911661863	2.11101898638035	3.80455730830565	3.45424297564438	1.03953588835187	0.901145829698065
ENSG00000171865	7.7879822375187	8.28191435782007	7.94648096753966	7.62757267972389	7.85495968732367	7.94187732705552	7.00595742256459
ENSG00000234171	4.00819014552515	0	2.93355869889295	4.27636593605377	3.92877767610173	2.65026627927602	2.63349908374298
ENSG00000171863	12.1500666759152	13.1786491330614	12.6111724848712	11.8884550422563	11.626639390561	12.6793114687285	11.6872378326596
ENSG00000225964	4.80761810241189	2.82441493502978	5.22957231153101	3.42353226338762	3.45424297564438	3.77260308406909	4.55803890497379
ENSG00000134326	9.44620026773863	7.89631675024938	7.85117087368959	8.08357662199188	7.96995747511987	7.69968342360307	6.7275582005088
ENSG00000134321	7.97721496429969	4.77403976778885	5.64297459524697	7.35015223333218	7.11919227568937	4.93337697972829	4.8889431722982
ENSG00000151692	6.34378189757991	2.3378570285089	3.83590915873503	6.30080588758724	5.24778242517152	4.8826572049622	4.75630063197813
ENSG00000236790	5.88219197918911	3.71880372171819	3.21721640213654	5.72496432297004	6.45612811339245	3.06849264354608	2.82228974443749
ENSG00000231435	3.8582351010964	2.82441493502978	2.58013212780751	2.90427965831286	2.88814603455711	4.16100570988994	2.82228974443749
ENSG00000236008	4.43635943476301	1.59824879552092	3.65762523742616	4.69291160528579	4.61343406309207	4.32194201456219	2.98920973011426
ENSG00000235092	5.23021542769131	6.32341459670417	6.03868375659619	5.10907919827554	5.10596522064134	4.65981180628129	5.52708691895972
ENSG00000115738	11.9034901609356	12.2393507643927	12.4246987718794	12.7724433530795	12.3591307101501	12.563330108751	11.4652977963892
ENSG00000260837	3.59928809165048	0	3.45416131789444	4.96670956938878	5.04509010912583	2.65026627927602	4.93057907059869
ENSG00000134313	10.9846912509546	10.3674900509201	11.3505640875681	11.6007687964536	11.5700351591263	11.3418422989655	11.8229753158943
ENSG00000143797	7.98175518546093	7.67083727965373	7.76020498176392	7.13399950163994	7.23954229455248	7.94187732705552	9.52319674847075
ENSG00000151693	7.34899940684348	5.99685027579024	5.9051906977386	6.61906940064924	6.5793135460776	4.71883234332833	4.61021658379842
ENSG00000119185	8.49824138234374	8.66729301792188	8.46657034437636	8.50015846463601	8.59475012940806	8.4397300830817	7.69680468261766
ENSG00000119203	8.14042506168581	7.62711287906224	8.35762398135956	8.89685366826544	8.83620518569808	8.12212358375261	8.17938018091868
ENSG00000134330	8.32683374539933	8.6600792808363	8.34294758511222	8.82301237265123	8.60796400060818	8.46149405800517	8.84799937067679
ENSG00000151694	10.9744764699244	11.838061074045	11.8951956883934	10.8631083695793	10.8594754475679	11.5552428498873	11.86451758964
ENSG00000238462	4.962649881597	4.41126059962802	5.73577719027462	4.86333897989	4.52703367828901	5.36147075495439	6.73932070837895
ENSG00000271855	6.14762366665857	7.11777177164864	6.95231765719956	6.75523803794592	5.99115713372447	5.59992719236522	4.8889431722982
ENSG00000134308	11.0104717716043	12.7369146543516	12.3523502219227	10.6408450352089	10.2690902012005	11.1700787894862	10.6731845192991
ENSG00000115750	7.59404708467634	7.2194218400429	7.47401442173686	8.13995558459747	8.31430398225291	7.51220633553167	8.68726391137107
ENSG00000269973	5.60454799494711	3.47751911661863	3.99456469172968	5.56943478105997	5.80174852339161	4.32194201456219	6.25694898861024
ENSG00000134317	4.5385071835112	5.634190616605	4.59930241668139	3.42353226338762	3.85975436971083	6.3438170663991	6.18995377012667
ENSG00000260077	7.69150194839951	6.64904097498125	5.69012196495273	7.57945834197662	7.67078027994565	7.60898805179762	7.46143711345462
ENSG00000172059	11.7876953268291	12.2579858875726	11.295890622994	11.2235509355845	10.9863221683067	12.5557621162936	10.2298039426459
ENSG00000171848	6.73657280576639	6.67789978807748	5.75807419187533	4.69291160528579	3.02052882301288	2.87448177217153	2.16033764350512
ENSG00000115756	11.2372015063111	11.8081887583826	10.8657249722288	10.2313079518854	10.1602801423382	10.801633196585	11.6120612456988
ENSG00000115758	9.92774562219483	10.8910084787869	10.4660502346883	9.85717191139524	9.57145799230737	10.6468733210832	8.52005104597634
ENSG00000206633	4.92542564221765	5.51129803534179	4.64787469213644	6.24020076090736	5.72620298138688	4.07326276388756	3.13880429617032
ENSG00000257135	4.84796565750879	5.228803390048	3.45416131789444	5.15357600954391	5.44916180219155	3.97983584168637	3.39821835481663
ENSG00000115761	8.90910645451135	8.51568416159359	9.18280041165332	8.60401670840495	8.62105794150961	9.21743385579309	8.76986899331707
ENSG00000243819	2.31363461767247	4.77403976778885	3.559477134893	3.68838235732035	3.92877767610173	3.23947903556953	3.80871760677765
ENSG00000143870	10.2003058126632	9.69405193506551	10.7899739890445	10.2429382231595	9.98804421000397	9.73076779234196	9.09228291628863
ENSG00000162976	9.56593469751731	8.37297027230232	8.58355573692413	9.25947827459622	8.97321750646928	8.53312800027662	8.74965689196694
ENSG00000134318	9.58992371918067	8.98274026856085	8.63265210246289	10.0766967407964	10.2079212987179	8.42651233897402	9.16603666444165
ENSG00000169016	7.84391573058589	8.57825216963382	8.9843169984145	7.35015223333218	7.11919227568937	8.61697180718805	7.43274760987062
ENSG00000239899	7.1535995006898	8.57057796237566	6.19395299981876	4.0121238580642	5.32662987017613	6.89752388870145	4.8889431722982
ENSG00000134324	9.1580651881214	10.0071283941313	9.16413669703917	8.94194910780174	9.3248971612252	9.33528090817985	11.0566136015114
ENSG00000071575	5.71774257115249	7.13868283560165	6.31920466470295	6.33983958163003	6.00720408417128	5.24583103298425	4.05449043122323
ENSG00000151779	10.2463146589473	9.07241469896687	9.78265463820417	10.6092430795717	10.7246436576025	9.90607009798799	10.0713185998211
ENSG00000079785	8.34808883459761	7.76798483589822	8.49339917580853	9.0751433484083	8.89344454135566	8.93272150971417	8.04366844929875
ENSG00000197872	12.0452495032182	11.6295179930389	12.3569228032789	12.046864575696	11.9286683090307	12.3348000322609	13.1687181610294
ENSG00000163029	7.89294851489528	7.05315608763134	7.36927604000266	8.57568202448763	8.58141411064901	7.55332387373019	8.88553308705424
ENSG00000178295	7.50222565583161	7.76798483589822	7.79296949332088	7.30154750261753	7.3123858578975	7.70699017175865	6.90513624262699
ENSG00000240857	5.65089691275652	4.10618459694941	5.96392067041154	5.60191099361548	5.64648190387154	5.43371565683224	5.96799751523785
ENSG00000236204	3.16070707689657	2.82441493502978	2.58013212780751	4.10568625799139	3.35741753305583	2.65026627927602	1.45159216230282
ENSG00000228784	6.32960421940968	5.90219214593163	5.22957231153101	6.96951217841885	7.42417967544653	5.72035364995096	5.79845405129656
ENSG00000183891	6.70397035603009	6.78788698201087	7.52040629720142	7.78435906745789	7.59317105339728	7.30632946459434	7.86192740069919
ENSG00000271991	3.69086607913953	4.54258695386237	3.83590915873503	4.49962036183748	4.05764343471017	3.06849264354608	2.63349908374298
ENSG00000118965	6.19531566697493	5.99685027579024	6.12699833238655	6.17693765232884	6.24229423746412	5.39804537877541	4.8889431722982
ENSG00000068697	10.7373212341495	10.9154487540297	12.5022862187965	10.6822486051233	10.3092837348501	11.3259134499258	10.4417126847932
ENSG00000055917	11.4164183591936	10.8817355666183	12.1216599316464	11.8458714857298	11.7031307294273	11.3749031859541	12.2205348030761
ENSG00000143878	12.9940230011729	12.8796100737475	11.3849996953416	13.1643400930819	12.8367548372269	11.2001639937226	10.7695406350367
ENSG00000228950	2.71366837669273	0	2.11101898638035	5.46737492781417	5.64648190387154	1.03953588835187	4.55803890497379
ENSG00000118960	9.18587669265927	9.00568682468622	8.34294758511222	9.84535235825405	9.88868219152629	8.77132066761296	8.86688828689721
ENSG00000231948	3.59928809165048	3.18761300887002	0	3.42353226338762	3.35741753305583	1.03953588835187	4.1977846616995
ENSG00000233416	2.52747258896495	0	0	3.80455730830565	3.45424297564438	1.63743986325387	4.44765640149965
ENSG00000118961	5.69580302854551	0	2.36455950793486	7.46935632191492	7.41217742875686	3.87993720504894	2.41622991878119
ENSG00000119771	3.8582351010964	5.44568927656727	2.36455950793486	2.085159318413	2.18818721642471	2.05890482480417	2.98920973011426
ENSG00000119778	11.651139804018	12.1332959926206	11.9406829639347	11.5651816074782	11.7356999280581	11.9270106509009	12.0836383379125
ENSG00000224464	6.09830102585113	4.10618459694941	5.19729939793444	5.10907919827554	5.42547385521944	6.67714685375337	5.32335888006843
ENSG00000173960	8.43673874152707	9.31676864935653	9.36089689477796	8.18887900665509	7.90292233722467	9.32819087204297	9.42282889203419
ENSG00000234946	4.00819014552515	0	2.58013212780751	3.42353226338762	4.28526085098457	4.07326276388756	5.49968587121579
ENSG00000205639	3.69086607913953	1.59824879552092	3.99456469172968	3.56202644573208	3.02052882301288	3.53052810100398	5.12244070691391
ENSG00000163026	3.77697631888484	0	3.83590915873503	5.06316618343512	5.16437534212712	4.71883234332833	5.55397722515395
ENSG00000119782	3.02651875438447	1.59824879552092	2.93355869889295	3.68838235732035	3.45424297564438	2.87448177217153	4.38912753927669
ENSG00000115128	8.06112674992278	8.2534379069476	9.03769565894908	8.47845849906464	8.00234205761337	8.66653452612504	8.48903546603026
ENSG00000219626	7.53965838309291	6.73394127233344	7.50730299750586	7.79843940362918	8.1028366455805	7.29667589536822	8.94515142623203
ENSG00000115129	7.43096985959331	8.18472195641608	6.89310357209209	7.48685170056604	7.43608289483751	7.06610373339848	7.43997364914451
ENSG00000186453	2.71366837669273	1.59824879552092	1.41141623664498	2.90427965831286	3.92877767610173	2.05890482480417	3.51230070833696
ENSG00000198399	11.974402711587	11.7362687588011	12.5068196266563	11.9504566830578	12.1640387910314	12.3101224625419	12.8094124386785
ENSG00000251805	3.8582351010964	4.77403976778885	4.32839041862219	4.10568625799139	3.54497674419106	4.8826572049622	4.66057284562319
ENSG00000084676	11.5408567556601	10.7435331041934	11.1025108826582	11.8180641718109	11.754537826124	11.3418422989655	11.6259883156955
ENSG00000206732	2.87855725524597	0	4.38679567446152	3.56202644573208	4.73404509862801	2.87448177217153	4.8889431722982
ENSG00000184924	7.52728841023694	7.6992676051042	7.78213045773623	7.73396669279689	7.39398473646551	8.07772047284798	6.67952503505705
ENSG00000138092	6.39913910426673	5.37695411708694	5.13050350220326	6.5205817006567	6.37188067946337	5.63098925509111	4.7092305767412
ENSG00000138031	7.92630611779496	10.5580594897338	10.2869113140529	6.86634955074671	7.23954229455248	9.40657397605041	9.88665383690399
ENSG00000115137	7.27694298062558	7.51962061886877	7.68655459839544	7.36914470741144	7.21211452964344	7.92943740114166	6.98634898162409
ENSG00000237953	2.31363461767247	1.59824879552092	2.93355869889295	2.41258988407027	2.74237703473556	1.63743986325387	2.41622991878119
ENSG00000224165	5.86263210543627	7.35067805578218	6.02035305947348	6.96951217841885	6.33421208139282	5.63098925509111	5.70557352098211
ENSG00000115138	3.50150062063204	4.97344299326954	3.34054781363769	4.19354868309829	4.11800203082925	2.65026627927602	2.82228974443749
ENSG00000272048	3.9351600549912	1.59824879552092	2.58013212780751	2.90427965831286	3.14177849754872	2.87448177217153	2.82228974443749
ENSG00000119772	9.35814789552349	9.2983014962447	9.37539273423249	9.35068977950469	9.4073232608751	9.58966577978386	8.82885986107658
ENSG00000138101	6.54125269502438	7.09655315008832	7.53339165637097	6.68118046928943	7.02775812868656	7.59330194178315	7.87264772283158
ENSG00000143970	10.350041777513	8.23413646736413	9.17867373530002	10.9958138880458	10.9463075171173	9.26276201126082	8.69332372051838
ENSG00000218682	3.50150062063204	3.47751911661863	3.74951942146031	3.80455730830565	4.23163395535553	4.46671360872394	3.39821835481663
ENSG00000084731	5.71774257115249	5.57405246995406	5.19729939793444	5.993272291738	6.08486593539482	4.53399259181824	6.11969530601595
ENSG00000084733	11.4751567717911	10.4617763456906	9.79078859222251	11.7294379597801	11.4581097589904	9.64206632687536	9.97138008469004
ENSG00000199872	4.5385071835112	5.30477962313168	5.32227308575772	4.63131443218978	5.13546586614065	5.32394473428681	6.48365397340979
ENSG00000214465	3.16070707689657	0	2.36455950793486	2.085159318413	3.99464891084152	0	3.27433421141826
ENSG00000157833	4.00819014552515	5.634190616605	5.56923232898555	2.67928097903747	3.02052882301288	5.46852523391801	4.44765640149965
ENSG00000084754	11.3380258834629	11.5614578733379	11.753259224184	11.8102679668894	11.4994669866709	11.8016556528157	10.8042522322471
ENSG00000138029	10.6699915508865	10.4884939445566	11.285854292938	11.1513317438854	10.9546066248485	10.8228067439986	11.295436573756
ENSG00000173567	3.77697631888484	4.87718372591781	4.13748839636131	4.42897248668723	4.38688123547116	2.87448177217153	2.41622991878119
ENSG00000138018	8.34808883459761	7.6992676051042	9.11531380940797	8.91312147347643	8.76956204877578	8.70718199081288	9.3441325274217
ENSG00000115155	4.58699099674475	2.82441493502978	2.93355869889295	4.42897248668723	5.10596522064134	4.3961429931308	5.01041068592179
ENSG00000213699	10.2041964235268	10.7905364270398	11.09978542674	10.0371653680288	9.9397411023039	10.2289669072626	10.2339671089984
ENSG00000115163	3.50150062063204	3.92545733628	4.98685043944224	4.10568625799139	4.05764343471017	4.83008913572637	6.24048958539676
ENSG00000084764	6.82007391844938	6.49539537033575	6.19395299981876	7.20970631916014	7.0741994374037	6.72111370210923	8.19654752397255
ENSG00000119777	9.44291116923718	9.47312630114564	9.18485933178415	9.83001210058284	9.7690850539675	9.55971037498082	9.69762182949156
ENSG00000084693	6.67061407843391	6.64904097498125	7.21663293618191	6.75523803794592	6.75113892339321	7.16492147685525	7.36603098567432
ENSG00000272056	2.06249186112524	0	2.58013212780751	3.27031744045796	3.45424297564438	3.23947903556953	4.1977846616995
ENSG00000272148	3.02651875438447	1.59824879552092	3.83590915873503	4.49962036183748	4.65476828368984	4.07326276388756	4.80188335580512
ENSG00000228474	9.53691975392387	9.67628423067986	9.83078436925822	9.26455886275376	9.12432057177579	9.32819087204297	8.91953256618799
ENSG00000138080	4.38243881584995	0	4.44292819458115	4.0121238580642	3.71093363876742	2.65026627927602	5.12244070691391
ENSG00000138030	5.31900825339626	3.71880372171819	3.34054781363769	5.10907919827554	3.99464891084152	3.87993720504894	3.89537809682773
ENSG00000143994	1.75821945050536	2.3378570285089	3.559477134893	2.90427965831286	2.74237703473556	2.87448177217153	2.16033764350512
ENSG00000138073	8.53886056594154	7.71327539387474	7.79296949332088	9.29715361112876	9.28596466052868	8.01434508957912	8.21772335871908
ENSG00000138074	8.91148808700608	6.8141217883	7.47401442173686	8.08357662199188	8.20724132081574	8.32094048176358	5.47175430410685
ENSG00000138085	8.91860948506161	8.88712029114542	9.3554231830517	9.30949654498806	8.84739056211788	8.79551318367767	7.85112682167269
ENSG00000084774	8.29069754329934	7.74088943369902	6.46187280769927	8.29696767765169	8.47869879441152	6.94773263353757	6.25694898861024
ENSG00000163794	4.26814701610236	2.82441493502978	0.871836374156443	4.35468608856605	4.61343406309207	3.39233067961497	3.97712668115064
ENSG00000115204	8.38626135877862	7.55115855143806	7.27191390906593	9.112252849042	9.14803447514825	7.53701721156751	8.09492366525902
ENSG00000115207	9.70147711814137	8.86846394149214	8.72609995690892	10.1347279558922	10.2699217710115	9.68525010911104	9.23827650356948
ENSG00000234072	5.60454799494711	4.66294991359728	4.64787469213644	5.86534672500643	6.2691594548073	5.02976154714248	4.80188335580512
ENSG00000115211	8.09504823716962	7.94461507392324	7.61506187475666	8.75965277255676	8.85848988382419	7.96033837606285	9.0598172791666
ENSG00000115234	11.0314266445482	9.57252664020981	9.4897316140792	10.7971470661832	10.6915107272377	9.68709865817973	8.91175734870019
ENSG00000163795	8.88749296597259	10.2133923344583	9.38437922370454	8.42500686532622	8.48730497891768	9.29463537784565	8.82610479927048
ENSG00000115241	9.39094728595581	9.40139718231909	8.68013251105488	9.43196697361875	9.02141855632015	9.3725169762642	9.20048287075725
ENSG00000213453	4.38243881584995	4.97344299326954	3.34054781363769	4.75198616883089	5.01366140218408	3.77260308406909	4.84606987040974
ENSG00000115216	10.8150672689063	10.900222169819	11.5514278861873	10.47870442574	10.4971272109416	11.2843889385887	10.8354108803367
ENSG00000157992	4.962649881597	4.54258695386237	4.82729547021179	5.46737492781417	5.78322975496594	6.03098803180369	5.72936023390446
ENSG00000138002	7.48952909183514	6.42904243238721	5.09590885028622	7.73396669279689	8.06117080882512	5.69117627324744	7.29607886010553
ENSG00000243943	7.26208953622124	7.48737781610064	6.19395299981876	8.27195716991767	8.26843845744992	7.44387903116146	7.71478969445307
ENSG00000176714	5.19936041834003	5.90219214593163	5.5178898648864	3.56202644573208	3.25362320518174	4.07326276388756	5.01041068592179
ENSG00000198522	8.29069754329934	8.87470956936566	8.51647198602566	7.91287882849161	7.69078985555879	8.12757909961254	7.64771881196599
ENSG00000119760	9.48509544023424	9.97551385854058	9.90260027533212	9.65921398817098	9.67553684356307	9.90607009798799	9.95381895525646
ENSG00000163798	8.22710917657937	7.82069518145086	8.29800074304698	8.75965277255676	8.70461958672527	8.65146500677758	8.192274801704
ENSG00000243147	6.99195934666524	7.72714848141846	6.67608223907311	6.41487475182742	6.29553353202915	7.32544495172496	7.55758247780517
ENSG00000171174	9.94528607524676	10.6076485227224	8.50991732139915	7.29162692047132	7.15564329445281	7.63220199557331	7.11832064392562
ENSG00000158019	8.88749296597259	8.28191435782007	7.55901691411324	9.06061237980625	8.99550973496246	8.08334617660151	8.01492403701233
ENSG00000265321	2.71366837669273	0	2.36455950793486	2.67928097903747	3.71093363876742	2.3846756967756	1.45159216230282
ENSG00000225991	5.19936041834003	0	3.99456469172968	5.0157438459489	5.66682895629427	4.7755329522519	5.25944545529963
ENSG00000229951	1.37213626134902	3.18761300887002	3.34054781363769	3.91207030110164	3.54497674419106	2.87448177217153	2.41622991878119
ENSG00000075426	14.9298386555084	16.2893938337314	15.4170439894689	13.7792346372539	13.8491602341976	15.0943443875033	14.6308771441124
ENSG00000270640	9.1839078390207	8.4078421743518	8.592889476653	8.12327202193945	8.34303716453686	8.72528618878599	8.54036375029463
ENSG00000270210	3.39659994465825	0	6.81017011193576	4.75198616883089	4.48181229406492	5.93468816486192	5.82076904207356
ENSG00000227938	3.16070707689657	2.3378570285089	3.08234782447163	0	0	2.3846756967756	2.63349908374298
ENSG00000163803	8.87045571762565	7.67083727965373	8.92642825431601	8.15644841930205	8.16495176202036	8.31138450934987	7.75590281809149
ENSG00000226833	2.52747258896495	0	1.41141623664498	4.10568625799139	3.45424297564438	2.3846756967756	2.16033764350512
ENSG00000213639	12.3935450233065	12.6078924836932	12.7917288605435	12.0174468280222	11.6978878183805	12.6874146358211	12.5052101370994
ENSG00000163806	8.58435044119872	7.15929513062184	7.84597580169195	7.14506104684761	7.2530630825229	8.05499568646802	8.33088552504402
ENSG00000171103	6.47838516113805	6.83988803350887	6.10976262264049	7.0063724748829	7.28632085131127	7.06610373339848	7.30402093252145
ENSG00000163811	9.84419368118754	9.56482183467972	10.205080751242	9.42063254736099	9.55926504932996	10.0012664341986	9.74943490618848
ENSG00000264994	3.02651875438447	3.47751911661863	2.11101898638035	2.90427965831286	2.58020695810024	3.77260308406909	2.82228974443749
ENSG00000265145	4.00819014552515	4.2667716376633	4.49695825262468	3.42353226338762	3.45424297564438	4.93337697972829	3.80871760677765
ENSG00000265706	4.38243881584995	0	3.08234782447163	2.90427965831286	3.25362320518174	4.83008913572637	3.97712668115064
ENSG00000189350	6.13136942810928	9.68697109007195	6.14403055772711	6.78382842009742	7.09687124647712	7.68495796289944	7.73255325824677
ENSG00000115295	10.1964046813551	10.0819115025824	10.6891433287635	10.8838917509632	10.9674791555795	9.63442235859527	9.89587950267775
ENSG00000119801	12.4548367818065	12.9655080568633	13.3553006434275	11.9692495597199	11.5598714887764	12.4873941398425	11.88980443685
ENSG00000213626	4.80761810241189	0	4.59930241668139	5.27938070099007	4.23163395535553	4.53399259181824	3.71651699463577
ENSG00000172954	6.51643344901903	6.32341459670417	5.59423424097207	6.95701311859373	6.7794454430272	5.63098925509111	3.80871760677765
ENSG00000013016	7.36993276702052	7.92066801813407	6.42053392067172	6.82567892375686	6.63200883217689	6.46943019414137	5.86438949997372
ENSG00000273165	3.50150062063204	3.71880372171819	4.78448852620561	5.81082177166205	5.72620298138688	2.65026627927602	5.92744274820844
ENSG00000162959	8.37595043434686	10.6076485227224	8.72043348713878	8.29696767765169	8.68729433284276	8.92647535518175	9.25065752377355
ENSG00000162961	6.37172599642593	3.47751911661863	5.16428799167219	6.90590500865963	6.91320197281668	5.39804537877541	6.30522963547155
ENSG00000221326	2.31363461767247	2.3378570285089	3.91741677817488	3.0988763445592	2.39747163545167	4.32194201456219	3.80871760677765
ENSG00000021574	9.6694703101454	10.5541734043162	11.1643378396699	9.79532713452943	9.64252775854814	10.6015275262155	10.147228515708
[truncated: 15,446 more rows]

## Sheet: raw_counts
Sample_ID	Genotype
	T403	T401	T406	T404	T400	T402	T407
ENSG00000223972	0	0	0	0	0	0	0
ENSG00000227232	279	225	240	459	296	297	235
ENSG00000243485	0	0	0	0	0	0	0
ENSG00000237613	0	0	0	0	0	0	0
ENSG00000268020	0	0	0	0	0	0	0
ENSG00000240361	0	0	0	0	0	0	0
ENSG00000186092	0	0	0	0	0	0	0
ENSG00000238009	10	0	7	16	11	3	3
ENSG00000239945	0	0	0	0	0	0	0
ENSG00000233750	0	0	0	0	1	0	0
ENSG00000237683	580	73	708	1426	1377	606	1206
ENSG00000268903	2	0	2	10	4	1	2
ENSG00000269981	0	0	0	0	0	0	0
ENSG00000239906	18	1	4	28	22	6	11
ENSG00000241860	260	201	425	635	660	318	531
ENSG00000222623	8	0	7	3	3	4	6
ENSG00000241599	0	0	0	0	0	0	0
ENSG00000228463	8	5	18	17	4	18	67
ENSG00000241670	0	0	0	0	0	0	0
ENSG00000237094	6	79	49	9	70	30	41
ENSG00000250575	0	0	0	0	0	0	0
ENSG00000233653	0	0	0	0	0	0	0
ENSG00000224813	0	0	0	0	0	0	0
ENSG00000235249	0	0	0	0	0	0	0
ENSG00000269732	0	0	0	0	0	0	0
ENSG00000256186	0	0	0	0	0	0	0
ENSG00000236601	0	0	0	0	0	0	0
ENSG00000236743	0	0	0	0	0	0	0
ENSG00000236679	0	0	0	0	0	0	0
ENSG00000231709	0	0	0	1	3	0	0
ENSG00000235146	0	0	0	0	0	0	0
ENSG00000239664	0	0	1	0	0	0	0
ENSG00000230021	0	0	1	1	2	1	2
ENSG00000223659	0	0	0	0	0	0	0
ENSG00000225972	1	1	1	1	2	1	4
ENSG00000225630	2	7	11	5	23	12	5
ENSG00000237973	8361	17292	11257	11718	766	486	13199
ENSG00000229344	1	0	5	1	9	8	1
ENSG00000240409	0	0	3	1	0	0	0
ENSG00000248527	1	12	4	2	9	5	4
ENSG00000198744	26	181	68	48	86	79	85
ENSG00000268663	0	0	0	0	0	0	0
ENSG00000185097	0	0	0	0	0	0	0
ENSG00000229376	0	0	0	0	0	0	0
ENSG00000224956	25	64	24	39	52	28	59
ENSG00000235373	15	12	34	42	39	20	39
ENSG00000223181	0	0	0	3	1	2	3
ENSG00000240618	0	0	2	0	3	1	1
ENSG00000229905	0	0	0	0	0	0	0
ENSG00000228327	120	79	144	205	284	120	145
ENSG00000237491	69	13	131	124	69	22	122
ENSG00000230092	21	1	41	21	20	48	61
ENSG00000269831	11	6	15	9	12	18	22
ENSG00000240453	8	2	43	16	33	21	25
ENSG00000177757	4	0	7	3	10	2	16
ENSG00000225880	110	90	203	210	167	139	155
ENSG00000228794	63	144	302	97	344	299	209
ENSG00000230368	0	0	0	2	1	0	1
ENSG00000234711	0	0	1	0	0	0	2
ENSG00000269308	0	0	0	0	0	0	0
ENSG00000272438	0	0	0	0	2	0	3
ENSG00000230699	3	0	0	8	5	0	5
ENSG00000241180	0	0	0	0	0	0	0
ENSG00000223764	0	0	2	0	1	3	3
ENSG00000187634	1	0	1	0	1	12	1
ENSG00000268179	0	0	0	0	0	2	1
ENSG00000188976	752	742	953	1302	1711	1102	1084
ENSG00000187961	184	152	193	293	447	365	440
ENSG00000187583	19	75	88	41	71	124	73
ENSG00000187642	1	12	0	1	4	3	18
ENSG00000272512	69	24	10	88	226	60	240
ENSG00000188290	125	558	47	180	1087	209	379
ENSG00000231702	0	0	0	0	0	0	0
ENSG00000224969	0	0	0	0	0	2	0
ENSG00000187608	96	134	121	132	721	208	91
ENSG00000188157	97	803	424	175	832	786	479
ENSG00000242590	0	0	0	0	0	0	0
ENSG00000217801	2	448	76	4	134	855	186
ENSG00000273443	0	22	1	0	7	50	2
ENSG00000237330	4	0	2	9	0	2	3
ENSG00000131591	228	139	178	447	422	310	209
ENSG00000223823	0	0	0	0	0	0	0
ENSG00000207730	0	0	1	0	1	0	1
ENSG00000207607	0	0	0	1	0	0	0
ENSG00000198976	0	0	0	0	2	0	0
ENSG00000272141	1	2	2	0	5	1	0
ENSG00000205231	0	0	0	0	0	4	3
ENSG00000162571	0	0	0	0	0	0	0
ENSG00000186891	2	64	41	6	26	103	16
ENSG00000186827	11	59	74	26	80	81	68
ENSG00000078808	1234	1763	2436	1752	2906	3772	1280
ENSG00000176022	206	39	147	289	389	90	37
ENSG00000184163	21	80	69	61	123	70	249
ENSG00000260179	17	109	51	46	79	78	133
ENSG00000160087	673	850	988	1144	1330	1431	1886
ENSG00000230415	12	9	7	20	19	7	3
ENSG00000162572	62	26	48	115	128	63	69
ENSG00000131584	1464	1541	1470	3251	3203	1423	2172
ENSG00000169972	156	52	132	262	269	60	144
ENSG00000127054	1024	648	1167	1966	2145	932	2159
ENSG00000240731	40	24	31	79	78	26	98
ENSG00000224051	228	63	132	325	318	89	209
ENSG00000169962	27	2	11	37	32	10	49
ENSG00000107404	465	629	446	777	929	824	617
ENSG00000162576	1	11	3	5	4	0	12
ENSG00000175756	268	332	507	396	631	463	343
ENSG00000223663	2	0	0	7	0	0	1
ENSG00000221978	2045	1694	3126	3790	3265	3343	3867
ENSG00000224870	113	33	53	151	97	59	108
ENSG00000242485	359	141	468	676	684	446	794
ENSG00000264293	0	0	0	0	0	0	0
ENSG00000272455	21	60	46	32	18	18	49
ENSG00000235098	0	0	5	0	0	0	0
ENSG00000225905	0	0	0	0	0	0	0
ENSG00000205116	0	0	0	0	0	0	0
ENSG00000225285	0	0	0	0	0	0	1
ENSG00000179403	2	0	0	1	0	1	1
ENSG00000215915	0	0	0	1	3	1	3
ENSG00000160072	343	436	532	567	989	407	575
ENSG00000197785	132	79	63	199	281	64	77
ENSG00000205090	7	0	4	4	3	3	9
ENSG00000160075	634	575	737	897	1138	849	651
ENSG00000215791	0	0	0	0	0	0	0
ENSG00000215014	77	25	80	94	77	56	36
ENSG00000236684	1	0	0	1	0	0	0
ENSG00000228594	111	48	121	127	238	119	52
ENSG00000272106	122	109	163	181	216	195	91
ENSG00000197530	638	484	417	1006	1082	584	536
ENSG00000189409	1	0	2	1	4	2	0
ENSG00000248333	424	687	1283	692	1264	1053	1398
ENSG00000272004	10	0	6	10	8	16	7
ENSG00000189339	1147	210	683	1687	1105	371	1003
ENSG00000269737	1	0	1	0	2	0	1
ENSG00000269227	0	0	0	0	0	1	0
ENSG00000215914	1	0	4	4	2	3	2
ENSG00000008128	103	86	223	168	144	125	299
ENSG00000268575	173	42	181	281	188	158	360
ENSG00000227775	6	0	1	12	12	9	9
ENSG00000215790	79	23	105	173	132	61	147
ENSG00000008130	4555	568	1807	7368	5999	1234	2384
ENSG00000078369	5542	3985	5835	7265	8028	11322	4860
ENSG00000231050	9	0	5	21	10	7	17
ENSG00000169885	2	5	3	5	2	0	2
ENSG00000178821	3	2	2	2	4	4	6
ENSG00000142609	0	0	0	0	0	0	1
ENSG00000233542	0	0	0	0	0	0	0
ENSG00000187730	0	0	0	0	0	0	0
ENSG00000226969	0	0	0	0	0	1	0
ENSG00000067606	59	25	14	96	97	26	24
ENSG00000271806	6	3	4	12	47	12	5
ENSG00000182873	14	18	17	15	24	16	53
ENSG00000162585	338	842	781	577	1007	638	901
ENSG00000269554	11	27	19	23	35	13	22
ENSG00000203301	1	17	7	2	0	4	10
ENSG00000243558	0	0	0	0	0	0	0
ENSG00000234396	0	0	0	0	0	0	1
ENSG00000157933	1531	7042	7213	2315	3603	4241	6363
ENSG00000116151	56	18	27	109	89	14	32
ENSG00000272161	0	0	1	3	5	0	0
ENSG00000269753	0	0	7	0	1	2	4
ENSG00000269896	7	0	4	23	4	1	0
ENSG00000238240	0	0	0	0	0	0	0
ENSG00000272420	3	5	3	5	3	1	1
ENSG00000271921	1	0	0	4	0	0	1
ENSG00000271847	3	0	0	2	1	2	2
ENSG00000178642	0	0	1	0	0	0	0
ENSG00000157916	861	251	610	1414	960	454	1058
ENSG00000157911	132	120	165	156	229	190	119
ENSG00000149527	40	12	11	44	43	8	12
ENSG00000224387	5	0	0	7	8	3	4
ENSG00000229393	3	0	3	9	8	0	8
ENSG00000157881	607	148	434	1066	783	401	490
ENSG00000197921	0	5	0	1	0	0	0
ENSG00000272449	92	76	70	157	199	116	95
ENSG00000238164	103	31	36	150	110	105	27
ENSG00000157873	3115	3278	4808	5768	7362	5013	4454
ENSG00000225931	53	5	63	92	51	81	53
ENSG00000228037	5	0	8	6	7	2	14
ENSG00000157870	97	79	131	168	275	70	245
ENSG00000142606	26	0	17	33	36	13	14
ENSG00000237058	0	0	0	0	0	0	0
ENSG00000215912	35	7	19	91	26	8	20
ENSG00000233234	0	0	0	0	0	0	0
ENSG00000231630	0	0	0	0	0	0	0
ENSG00000169717	0	0	0	0	0	0	0
ENSG00000177133	0	0	0	0	2	1	0
ENSG00000256761	0	0	0	0	0	0	0
ENSG00000142611	0	0	0	0	0	11	0
ENSG00000226286	0	0	0	0	0	0	0
ENSG00000272235	0	1	0	0	0	1	0
ENSG00000130762	0	0	2	0	1	0	3
ENSG00000272088	0	0	0	0	0	0	0
ENSG00000162591	244	118	233	599	473	84	169
ENSG00000207776	0	0	0	0	0	0	2
ENSG00000238260	1	0	1	2	1	0	5
ENSG00000158109	471	43	292	537	348	241	301
ENSG00000116213	514	136	403	885	483	324	368
ENSG00000078900	19	4	2	30	8	1	1
ENSG00000227589	2	0	0	0	0	0	0
ENSG00000235131	0	0	0	0	0	0	2
ENSG00000227372	213	144	274	464	353	164	185
ENSG00000162592	0	0	0	0	0	0	0
ENSG00000235169	3	5	3	6	10	3	10
ENSG00000130764	694	485	878	1005	1153	974	955
ENSG00000266075	0	0	1	0	0	0	1
ENSG00000272153	0	0	2	0	3	0	4
ENSG00000116198	554	81	208	911	798	100	264
ENSG00000169598	121	36	99	204	171	36	33
ENSG00000264428	0	0	0	0	0	0	0
ENSG00000198912	384	156	537	702	502	306	429
ENSG00000236423	15	0	4	26	13	2	3
ENSG00000233304	0	0	0	0	0	0	0
ENSG00000226374	0	0	0	0	0	0	0
ENSG00000229280	0	0	0	0	0	0	0
ENSG00000235054	0	0	0	0	0	0	0
ENSG00000227169	0	0	0	0	0	0	0
ENSG00000232596	0	0	0	0	0	0	0
ENSG00000196581	0	1	1	2	3	0	0
ENSG00000231510	0	0	0	0	0	0	0
ENSG00000260972	0	0	0	0	0	0	0
ENSG00000264341	0	0	0	0	0	0	0
ENSG00000236948	0	0	0	0	0	0	0
ENSG00000216045	0	0	0	0	0	0	0
ENSG00000264101	2	0	0	2	0	0	0
ENSG00000131697	308	131	287	726	574	171	351
ENSG00000266687	3	0	2	3	1	1	1
ENSG00000069424	5372	4004	9684	8988	8998	11109	11854
ENSG00000268332	1	0	2	1	1	2	0
ENSG00000116254	36	22	8	84	94	7	7
ENSG00000116251	1739	2628	3116	2476	3063	3260	1974
ENSG00000226944	3	0	1	3	6	0	3
ENSG00000158286	169	27	117	325	419	61	141
ENSG00000116237	394	38	113	482	420	91	41
ENSG00000225077	0	0	1	0	1	0	0
ENSG00000173673	0	0	0	0	0	0	0
ENSG00000158292	64	50	82	105	221	144	23
ENSG00000097021	33	39	84	53	127	201	47
ENSG00000271746	17	34	7	14	5	18	5
ENSG00000069812	0	3	0	0	0	2	1
ENSG00000187017	0	0	0	1	3	0	0
ENSG00000265392	0	0	0	0	0	0	0
ENSG00000231868	0	0	0	0	0	0	0
ENSG00000215788	31	39	23	27	55	28	10
ENSG00000171680	2	0	3	6	0	3	25
ENSG00000162408	626	495	1114	926	975	1292	2458
ENSG00000253022	0	0	0	0	0	0	0
ENSG00000229519	0	0	1	0	0	0	0
ENSG00000173662	0	0	1	1	0	4	1
ENSG00000204859	628	264	407	1022	650	620	539
ENSG00000162413	1580	1137	3181	2540	1367	2182	3119
ENSG00000116273	119	122	578	191	230	792	735
ENSG00000041988	111	61	181	168	64	151	238
ENSG00000007923	442	74	260	768	522	290	154
ENSG00000228750	0	0	0	0	0	0	1
ENSG00000239166	0	0	0	1	0	0	1
ENSG00000237436	48	39	18	51	26	32	15
ENSG00000171735	225	67	389	333	302	450	682
ENSG00000227950	0	0	0	0	0	0	1
ENSG00000237365	0	0	0	0	0	0	0
ENSG00000207056	0	0	0	0	0	0	0
ENSG00000237402	0	0	0	0	0	0	0
ENSG00000237728	0	0	0	0	0	0	0
ENSG00000225126	0	0	0	0	0	0	0
ENSG00000270171	0	0	0	0	0	0	0
ENSG00000270035	1	0	0	0	1	0	0
ENSG00000269978	0	0	0	1	0	0	0
ENSG00000049245	2009	1418	2054	2447	2893	3392	1429
ENSG00000269925	66	43	69	83	106	90	71
ENSG00000049246	108	29	118	161	201	82	281
ENSG00000236266	1	3	3	0	4	16	1
ENSG00000049247	0	0	0	0	0	0	1
ENSG00000049249	52	12	23	77	29	20	23
ENSG00000270330	1	0	1	0	1	0	0
ENSG00000116288	541	344	405	734	675	488	237
ENSG00000200344	0	0	0	0	0	0	0
ENSG00000116285	22	114	67	20	34	103	61
ENSG00000238290	0	0	0	1	0	0	2
ENSG00000232848	0	0	0	0	0	0	0
ENSG00000229305	0	0	0	0	0	0	0
ENSG00000200975	0	0	0	0	0	0	0
ENSG00000227634	0	0	0	0	0	0	0
ENSG00000233645	0	0	0	0	0	0	0
ENSG00000265414	0	3	0	0	0	0	0
ENSG00000251977	0	0	0	0	0	0	0
ENSG00000162426	18	5	12	32	26	7	6
ENSG00000252254	1	0	0	0	2	0	0
ENSG00000142599	2060	780	2433	3627	3378	2830	2590
ENSG00000232912	13	0	9	30	7	7	4
ENSG00000221083	2	0	1	1	0	0	1
ENSG00000270282	0	0	0	0	0	0	0
ENSG00000234619	0	0	0	0	0	0	0
ENSG00000224315	4	5	3	14	12	4	8
ENSG00000222511	5	0	2	17	6	3	4
ENSG00000226545	0	0	0	0	0	0	0
ENSG00000228423	9	9	5	19	5	3	10
ENSG00000229716	0	0	0	0	0	0	2
ENSG00000074800	7212	4708	8126	8656	8654	19858	5648
ENSG00000236269	188	230	295	281	286	245	408
ENSG00000230679	8	2	4	3	3	5	2
ENSG00000201725	0	0	0	0	0	0	0
ENSG00000238249	0	0	0	0	0	0	0
ENSG00000232208	0	0	0	0	0	1	0
ENSG00000232663	0	0	0	0	0	0	0
ENSG00000131686	0	0	0	0	0	1	2
ENSG00000265141	0	0	0	0	0	0	0
ENSG00000197241	0	0	0	0	0	0	0
ENSG00000142583	6	36	85	21	38	29	52
ENSG00000252404	0	0	0	0	0	0	0
ENSG00000180758	86	126	189	130	159	53	144
ENSG00000207865	0	0	0	0	2	0	0
ENSG00000228526	1	0	4	1	3	2	0
ENSG00000234546	2	0	0	0	0	1	1
ENSG00000049239	2256	1050	2692	3058	4031	1404	960
ENSG00000252841	1	0	0	1	0	0	0
ENSG00000171621	22	671	53	30	80	863	164
ENSG00000252956	0	0	0	0	0	0	0
ENSG00000235263	0	0	0	0	0	0	0
ENSG00000171612	209	214	434	366	559	356	225
ENSG00000231181	29	2	61	44	56	17	26
ENSG00000188807	130	136	270	244	326	118	810
ENSG00000171608	4531	1752	4111	6799	6822	3775	9119
ENSG00000179840	11	6	3	18	24	6	5
ENSG00000233268	0	0	0	0	0	0	0
ENSG00000231789	0	0	1	0	0	3	1
ENSG00000171603	1276	551	1464	1922	1787	1812	1376
ENSG00000271264	0	0	0	0	0	0	1
ENSG00000178585	381	313	640	587	655	558	839
ENSG00000223989	0	0	0	0	0	0	1
ENSG00000162441	284	77	201	328	378	223	107
ENSG00000228150	2	1	2	8	2	3	6
ENSG00000173614	133	23	26	229	96	36	49
ENSG00000202415	5	3	3	14	4	5	7
ENSG00000265521	0	0	0	7	0	0	0
ENSG00000241326	0	0	0	0	0	0	0
ENSG00000162444	319	159	299	421	419	227	191
ENSG00000225786	0	0	0	0	0	0	0
ENSG00000130939	1406	565	1311	2417	1745	1423	2349
ENSG00000224340	0	0	0	0	0	0	0
ENSG00000233623	17	0	44	43	7	11	70
ENSG00000201746	7	0	0	10	3	1	12
ENSG00000054523	2652	1349	3635	4333	3345	4186	6993
ENSG00000264881	5	0	6	6	10	6	10
ENSG00000199562	5	0	9	9	13	21	23
ENSG00000264501	0	0	0	0	0	0	0
ENSG00000265945	9	49	38	14	25	24	48
ENSG00000142657	5028	2388	4907	5992	5021	8686	3407
ENSG00000271989	1	0	0	1	0	0	1
ENSG00000175279	4	0	2	7	4	0	0
ENSG00000251503	0	0	0	0	0	0	0
ENSG00000241563	0	0	0	0	0	0	0
ENSG00000160049	378	103	216	571	422	185	357
ENSG00000203469	0	0	0	0	0	0	0
ENSG00000142655	227	88	252	373	344	283	480
ENSG00000243267	6	0	0	13	5	5	19
ENSG00000130940	125	252	463	186	375	645	583
ENSG00000272078	3	0	3	8	3	3	14
ENSG00000225158	0	0	0	0	0	0	0
ENSG00000175262	43	9	20	75	36	8	25
ENSG00000215785	0	0	0	0	0	0	0
ENSG00000264181	0	0	0	1	0	0	0
ENSG00000207213	0	0	0	1	1	0	0
ENSG00000120948	1843	618	1596	2937	1705	1568	3527
ENSG00000009724	0	0	2	8	1	2	2
ENSG00000271895	70	43	114	160	76	112	296
ENSG00000116649	214	157	217	305	317	228	94
ENSG00000171824	886	460	1292	1543	1189	1047	800
ENSG00000226849	1	0	0	12	2	0	0
ENSG00000230337	2	0	0	3	1	2	0
ENSG00000198793	1878	604	2061	3443	2208	2252	1869
ENSG00000225602	0	0	0	0	0	0	0
ENSG00000253086	0	0	0	0	0	0	0
ENSG00000271794	0	0	2	2	3	9	9
ENSG00000171819	0	0	0	0	0	0	0
ENSG00000207451	0	0	0	0	0	0	0
ENSG00000238173	0	0	0	0	0	0	0
ENSG00000120942	244	47	265	309	306	339	113
ENSG00000238199	0	0	0	0	0	0	0
ENSG00000224338	0	0	0	0	0	0	0
ENSG00000204624	0	0	0	0	0	0	1
ENSG00000235643	0	0	0	0	0	0	0
ENSG00000116661	0	0	3	0	1	0	10
ENSG00000132879	94	75	101	183	212	81	227
ENSG00000116663	187	49	138	236	248	214	115
ENSG00000116670	146	349	560	279	473	600	448
ENSG00000162490	28	6	4	27	14	13	4
ENSG00000177674	1783	1006	1036	2566	2531	1312	766
ENSG00000215910	7	0	0	8	3	1	2
ENSG00000177553	1	0	14	11	2	2	153
ENSG00000177000	2006	2481	5256	3608	5692	5101	14049
ENSG00000011021	1121	689	1207	2216	1741	1679	3662
ENSG00000242349	40	9	39	112	129	58	123
ENSG00000175206	0	0	0	0	1	0	0
ENSG00000120937	0	0	0	0	0	0	0
ENSG00000224904	0	0	0	0	3	0	10
ENSG00000199347	616	122	113	409	151	604	303
ENSG00000201801	284	74	70	259	136	365	243
ENSG00000116685	982	534	1331	1319	1768	773	560
ENSG00000083444	1094	266	511	1526	1096	828	345
ENSG00000116688	1949	1457	2830	2820	2872	3687	2303
ENSG00000270914	0	0	0	0	0	0	0
ENSG00000116691	678	593	504	1125	1636	619	507
ENSG00000202461	0	0	0	0	0	0	0
ENSG00000243539	0	0	0	0	0	0	0
ENSG00000120949	430	50	117	580	498	103	47
ENSG00000201135	0	0	0	0	0	0	0
ENSG00000227875	0	0	0	0	0	0	0
ENSG00000028137	18338	11240	21190	24862	24762	29588	16855
ENSG00000263676	3	45	36	17	37	23	34
ENSG00000225196	0	0	0	0	0	0	0
ENSG00000252969	0	0	0	0	0	0	0
ENSG00000048707	4097	1486	4482	7796	4743	6334	9461
ENSG00000239149	5	0	4	19	7	9	14
ENSG00000229484	6	0	5	3	2	4	11
ENSG00000162496	52	2354	3157	52	111	3401	1713
ENSG00000221340	0	1	57	0	1	41	28
ENSG00000272482	3	47	105	2	4	112	129
ENSG00000204518	0	0	0	0	0	1	0
ENSG00000226166	0	0	0	0	0	0	0
ENSG00000188984	0	0	0	0	0	0	0
ENSG00000238771	0	0	0	0	0	0	0
ENSG00000157330	0	0	4	0	0	0	0
ENSG00000116726	0	0	0	0	0	0	0
ENSG00000116721	0	0	0	0	0	0	0
ENSG00000228338	0	0	0	0	0	0	0
ENSG00000204513	0	0	0	0	0	0	0
ENSG00000231103	0	0	0	0	0	0	0
ENSG00000179172	0	0	0	0	0	0	0
ENSG00000120952	0	0	0	0	0	0	0
ENSG00000243073	0	0	0	0	0	0	0
ENSG00000187545	0	0	0	0	0	0	0
ENSG00000204510	0	0	0	0	0	0	0
ENSG00000207434	0	0	0	0	0	0	0
ENSG00000234064	0	0	0	0	0	0	0
ENSG00000232423	0	0	0	0	0	0	0
ENSG00000250894	0	0	0	0	0	0	0
ENSG00000204508	0	0	0	0	0	0	0
ENSG00000239810	0	0	0	0	0	0	0
ENSG00000270601	0	0	0	0	0	0	0
ENSG00000250113	0	0	0	0	0	0	0
ENSG00000204505	0	0	0	0	0	0	0
ENSG00000233336	0	0	0	0	0	0	0
ENSG00000229978	0	0	0	0	0	0	0
ENSG00000236179	0	0	0	0	0	0	0
ENSG00000179412	0	0	0	0	0	0	0
ENSG00000224199	0	0	0	0	0	0	0
ENSG00000229571	0	0	0	0	0	0	0
ENSG00000204503	0	0	0	0	0	0	0
ENSG00000233394	0	0	0	0	0	0	0
ENSG00000204502	0	0	0	0	0	0	0
ENSG00000231219	0	0	0	0	0	0	0
ENSG00000207511	0	0	0	0	0	0	0
ENSG00000182330	0	0	0	0	0	0	0
ENSG00000237700	0	0	0	0	0	0	0
ENSG00000204501	0	0	0	0	0	0	0
ENSG00000228229	0	0	0	0	0	0	0
ENSG00000204495	0	0	0	0	0	0	0
ENSG00000204491	0	0	0	0	0	0	0
ENSG00000204488	0	0	0	0	0	0	0
ENSG00000204486	0	0	0	0	0	0	0
ENSG00000204485	0	0	0	0	0	0	0
ENSG00000224581	0	0	0	0	0	0	0
ENSG00000157358	0	0	0	0	0	0	0
ENSG00000204481	0	0	0	0	0	0	0
ENSG00000204480	0	0	0	0	0	0	0
ENSG00000204479	0	0	0	0	0	0	0
ENSG00000204478	0	0	0	0	0	0	0
ENSG00000162494	0	0	0	0	0	0	0
ENSG00000259961	0	0	0	0	0	0	0
ENSG00000215909	0	0	0	0	0	0	0
ENSG00000162493	0	0	0	1	0	0	0
ENSG00000222952	0	0	1	0	0	0	1
ENSG00000266358	0	0	0	0	0	0	0
ENSG00000237445	0	0	0	0	0	0	0
ENSG00000253085	0	0	0	0	0	0	0
ENSG00000116731	2318	1719	5863	3795	3717	5800	4599
ENSG00000252151	0	0	0	0	0	0	0
ENSG00000231606	0	0	0	0	0	0	0
ENSG00000234593	0	0	0	0	0	0	0
ENSG00000189337	0	0	0	2	2	0	0
ENSG00000235829	0	0	0	0	0	0	0
ENSG00000175147	1	21	9	5	7	26	4
ENSG00000171729	40	262	215	54	84	523	55
ENSG00000204464	0	0	0	0	0	0	0
ENSG00000215720	0	0	0	0	0	0	0
ENSG00000142621	1	38	17	9	21	48	68
ENSG00000233485	0	0	1	2	1	0	1
ENSG00000236045	0	0	0	0	0	0	0
ENSG00000228140	51	97	34	58	56	96	105
ENSG00000142634	7419	13407	10820	10009	16883	16382	12339
ENSG00000162438	25	46	32	40	41	29	393
ENSG00000142615	0	0	0	1	1	0	11
ENSG00000215704	1	2	0	0	0	0	6
ENSG00000132906	330	946	1139	481	1004	963	1957
ENSG00000116138	539	104	260	799	433	301	670
ENSG00000251866	2	0	4	7	0	1	3
ENSG00000272510	0	0	0	0	0	0	0
ENSG00000116771	0	0	2	1	0	3	0
ENSG00000237301	0	1	3	0	1	16	2
ENSG00000235084	7	0	2	7	3	2	0
ENSG00000252417	0	0	0	0	0	0	0
ENSG00000236500	0	0	0	0	0	0	0
ENSG00000197312	1115	276	992	1871	769	1006	2796
ENSG00000215695	0	0	0	0	0	0	0
ENSG00000271742	7	8	8	10	5	20	15
ENSG00000116786	1701	6413	7272	2821	5045	12477	3919
ENSG00000264048	0	0	0	0	0	0	0
ENSG00000237938	0	1	3	1	1	2	3
ENSG00000162461	64	226	345	159	310	583	231
ENSG00000224459	0	0	0	0	0	1	0
ENSG00000162460	2	0	0	5	0	2	3
ENSG00000162458	3	0	6	3	0	2	1
ENSG00000224321	0	0	0	0	0	0	0
ENSG00000233954	6	38	27	17	5	32	13
ENSG00000178715	0	0	1	1	0	1	1
ENSG00000179743	118	121	203	210	197	284	95
ENSG00000065526	4096	4051	7673	7474	6299	15380	9528
ENSG00000238818	2	0	3	5	3	5	19
ENSG00000270620	1	0	1	4	0	4	8
ENSG00000116809	534	2424	2380	886	1959	2544	1493
ENSG00000234607	1	0	1	0	3	0	1
ENSG00000231353	0	0	0	0	0	0	1
ENSG00000224966	0	0	1	0	1	3	1
ENSG00000183888	0	0	0	0	1	0	4
ENSG00000233078	0	0	0	0	0	0	0
ENSG00000173641	0	10	0	0	0	0	0
ENSG00000186510	1	0	2	3	2	1	1
ENSG00000232456	0	0	0	0	0	0	0
ENSG00000184908	0	0	0	0	1	0	0
ENSG00000185519	0	0	1	0	0	0	0
ENSG00000142627	0	87	20	0	28	42	26
ENSG00000227959	0	0	1	0	1	0	0
ENSG00000224621	0	0	1	0	0	0	0
ENSG00000234166	0	0	0	0	0	0	0
ENSG00000142632	65	0	38	100	70	8	241
ENSG00000237276	10	20	29	24	46	20	539
ENSG00000204377	8	9	33	8	21	28	172
ENSG00000132881	27	46	106	51	92	49	456
ENSG00000233929	12	6	21	26	22	30	136
ENSG00000037637	1163	560	1310	1831	1527	2078	4512
ENSG00000055070	1543	2485	3721	2119	4009	6387	2215
ENSG00000226457	0	0	0	0	0	0	0
ENSG00000187144	1	0	1	4	2	0	5
ENSG00000157191	1496	179	759	1946	2042	695	1333
ENSG00000226029	178	44	217	316	312	188	749
ENSG00000080947	145	5	50	245	122	19	31
ENSG00000206652	3124	843	485	2727	934	1057	1113
ENSG00000261135	6	6	1	9	3	1	9
ENSG00000224174	0	0	0	0	0	0	4
ENSG00000233421	1	0	1	1	0	1	0
ENSG00000268674	0	0	0	0	0	0	1
ENSG00000225710	0	0	0	0	0	0	0
ENSG00000266584	0	0	2	0	0	0	0
ENSG00000219481	648	112	202	1191	630	204	335
ENSG00000271732	0	0	0	0	0	0	0
ENSG00000215908	804	227	810	1636	472	223	233
ENSG00000186301	11	0	8	26	15	0	9
ENSG00000207513	52	15	5	36	8	14	8
ENSG00000237847	0	0	0	0	0	0	0
ENSG00000264742	0	0	0	0	0	0	0
ENSG00000236698	0	0	1	0	1	0	0
ENSG00000268869	0	0	0	0	0	0	0
ENSG00000268991	0	0	0	0	0	0	0
ENSG00000058453	361	516	397	746	828	206	489
ENSG00000207389	219	106	23	215	61	69	92
ENSG00000227684	0	0	0	0	0	1	1
ENSG00000186715	2	4	3	11	2	0	3
ENSG00000223643	0	0	0	0	0	0	0
ENSG00000230239	0	0	0	0	0	0	0
ENSG00000263811	0	0	0	0	0	0	0
ENSG00000228549	0	0	0	1	0	0	0
ENSG00000238142	40	23	47	49	53	31	33
ENSG00000235241	0	0	0	0	0	0	0
ENSG00000207005	717	219	114	635	242	325	306
ENSG00000272426	7	0	3	19	1	3	4
ENSG00000117122	1	0	0	3	0	1	16
ENSG00000226526	0	0	3	0	2	0	3
ENSG00000159363	880	545	1518	1373	1025	562	2093
ENSG00000117118	678	255	692	857	752	944	766
ENSG00000117115	826	495	988	1165	794	1205	1612
ENSG00000252180	0	0	0	0	0	0	0
ENSG00000204362	0	0	0	1	0	0	0
ENSG00000142623	0	0	0	0	0	0	0
ENSG00000142619	0	0	0	0	0	0	0
ENSG00000266634	0	0	0	0	0	0	0
ENSG00000159339	1749	166	646	2810	1284	348	379
ENSG00000269468	0	0	0	0	1	0	0
ENSG00000256049	0	0	8	0	8	1	3
ENSG00000227751	0	0	1	0	2	2	1
ENSG00000179051	2292	2126	7390	3000	6522	4964	4914
ENSG00000266727	0	0	0	0	0	0	0
ENSG00000239020	0	0	0	0	0	0	0
ENSG00000074964	2136	441	1349	3705	2000	357	1289
ENSG00000236648	0	0	0	0	0	0	0
ENSG00000117148	0	0	0	0	0	0	0
ENSG00000261781	0	0	0	0	0	0	0
ENSG00000117154	0	5	0	0	0	0	0
ENSG00000230035	0	0	0	0	0	0	0
ENSG00000225387	0	0	0	0	0	0	0
ENSG00000179023	0	0	0	0	0	0	0
ENSG00000235282	0	0	0	0	0	0	0
ENSG00000225478	0	0	0	0	0	0	0
ENSG00000009709	0	0	0	0	0	0	0
ENSG00000179002	0	0	0	0	0	0	2
ENSG00000255275	2	0	15	2	5	0	26
ENSG00000159423	56	17	85	90	111	52	288
ENSG00000265606	0	0	0	0	0	0	0
ENSG00000221662	2	0	6	3	1	1	16
ENSG00000169991	375	912	1123	559	1408	1176	1850
ENSG00000272084	46	51	123	80	76	168	301
ENSG00000127481	8075	6818	15045	14280	12830	21551	29241
ENSG00000266098	13	0	20	24	25	43	74
ENSG00000230424	43	17	45	56	56	61	120
ENSG00000127463	708	210	677	886	846	780	371
ENSG00000053372	128	32	105	176	200	116	46
ENSG00000211454	6	5	35	5	18	18	194
ENSG00000162482	8	10	50	14	33	32	159
ENSG00000270728	0	0	0	0	0	0	1
ENSG00000053371	274	83	176	329	386	232	419
ENSG00000200403	2	0	3	11	5	1	30
ENSG00000040487	196	298	298	341	375	434	380
ENSG00000265192	0	0	5	2	5	1	2
ENSG00000077549	3594	2408	3546	4953	5563	5719	4228
ENSG00000240490	0	1	0	0	0	0	0
ENSG00000201609	0	0	0	0	0	0	2
ENSG00000239027	0	0	0	0	0	0	0
ENSG00000235185	20	1	6	20	1	11	7
ENSG00000270136	0	0	0	0	0	0	0
ENSG00000173436	123	94	148	190	249	179	218
ENSG00000226396	37	39	55	48	59	40	72
ENSG00000158747	0	5	0	1	1	20	3
ENSG00000158748	0	0	0	0	0	0	0
ENSG00000162542	261	62	150	413	376	114	291
ENSG00000178828	0	0	0	0	0	0	0
ENSG00000235434	0	0	0	0	0	0	0
ENSG00000169914	215	42	429	348	286	339	351
ENSG00000188784	0	0	0	0	0	1	0
ENSG00000242688	0	0	0	0	0	0	0
ENSG00000188257	0	0	0	0	0	0	0
ENSG00000127472	0	0	0	0	0	0	0
ENSG00000117215	0	0	0	1	3	1	3
ENSG00000158786	0	0	0	1	0	0	0
ENSG00000227066	1	52	49	3	6	8	33
ENSG00000187980	4	0	16	13	2	2	43
ENSG00000225986	1	3	1	1	3	1	1
ENSG00000162543	27	131	100	31	58	31	100
ENSG00000228105	0	0	0	0	0	0	1
ENSG00000158816	0	0	0	0	0	0	0
ENSG00000226664	0	0	0	0	0	0	0
ENSG00000236963	0	0	0	0	0	0	0
ENSG00000226487	0	0	0	0	0	0	0
ENSG00000162545	2	0	7	4	4	1	10
ENSG00000090432	293	450	640	366	482	1127	523
ENSG00000215520	0	0	0	0	1	0	0
ENSG00000183114	0	0	0	0	1	0	0
ENSG00000158825	604	312	505	729	994	685	383
ENSG00000158828	496	170	529	748	531	388	964
ENSG00000117242	122	92	205	186	169	303	257
ENSG00000257033	0	0	0	0	0	0	0
ENSG00000244038	1369	793	1713	1763	1575	2586	1040
ENSG00000117245	5	1	1	0	8	2	6
ENSG00000235432	0	0	0	0	0	0	1
ENSG00000189410	6	10	11	15	13	21	56
ENSG00000233069	3	1	2	1	3	8	0
ENSG00000127483	3172	1056	3763	4598	3764	3531	2730
ENSG00000203394	0	0	0	0	0	0	0
ENSG00000075151	1722	763	1249	3102	1901	2503	3939
ENSG00000251914	0	0	0	0	0	0	0
ENSG00000221808	8	9	12	7	11	23	50
ENSG00000233072	12	8	13	33	6	65	113
ENSG00000236073	7	23	14	10	10	55	93
ENSG00000235112	0	0	0	0	0	0	0
ENSG00000266867	0	35	8	7	5	7	9
ENSG00000117298	3309	4175	5687	4860	4207	4460	2496
ENSG00000236936	0	1	1	0	0	2	2
ENSG00000231105	2	6	5	1	7	2	2
ENSG00000236216	0	0	0	0	0	0	1
ENSG00000228823	0	0	0	0	0	0	0
ENSG00000236009	0	0	0	0	0	0	0
ENSG00000227001	2	0	2	7	6	0	2
ENSG00000187952	1	1	0	1	7	1	7
ENSG00000186543	0	0	0	0	0	0	0
ENSG00000142794	6	4	40	10	7	14	22
ENSG00000176378	0	0	0	0	0	0	0
ENSG00000162551	0	33	0	0	0	27	0
ENSG00000233431	0	0	0	0	0	0	0
ENSG00000221781	0	0	0	0	0	0	0
ENSG00000076864	5	3	6	18	10	16	79
ENSG00000090686	1926	216	1066	3193	1344	745	3663
ENSG00000231978	0	0	0	0	0	0	0
ENSG00000187942	16	12	16	12	8	3	17
ENSG00000142798	30	23	51	39	41	31	24
ENSG00000232037	0	0	0	0	0	1	0
ENSG00000219073	0	0	0	0	0	0	0
ENSG00000264385	0	0	0	0	0	0	0
ENSG00000263991	0	0	0	0	0	0	0
ENSG00000201919	0	0	0	0	0	0	0
ENSG00000142789	0	0	0	0	0	0	0
ENSG00000263582	0	0	0	0	0	0	0
ENSG00000263929	0	0	0	0	0	0	0
ENSG00000201273	0	0	0	0	0	0	0
ENSG00000228397	10	1	3	14	9	16	8
ENSG00000218510	95	30	39	148	97	67	41
ENSG00000070831	8058	6470	9051	9562	12698	17632	7300
ENSG00000230068	250	537	349	413	431	302	408
ENSG00000271428	0	0	0	0	0	0	0
ENSG00000271840	43	51	100	87	94	108	179
ENSG00000162552	0	0	0	0	0	0	0
ENSG00000266564	0	0	0	0	0	0	0
ENSG00000234397	0	0	0	0	2	0	0
ENSG00000184677	1287	170	837	2310	1496	569	676
ENSG00000237200	30	2	16	44	19	19	14
ENSG00000070886	0	0	2	0	5	1	11
ENSG00000173372	16	72	108	23	356	414	110
ENSG00000159189	3	21	11	3	61	128	10
ENSG00000173369	1	15	15	3	95	191	21
ENSG00000133216	218	68	91	335	441	183	136
ENSG00000265422	3	4	0	0	0	3	6
ENSG00000216157	0	0	0	0	0	0	0
ENSG00000225952	0	0	0	0	0	0	0
ENSG00000264014	0	0	0	0	0	0	0
ENSG00000272796	13	13	7	16	45	3	19
ENSG00000215906	0	0	0	0	0	0	0
ENSG00000227868	0	0	0	0	1	2	3
ENSG00000004487	864	312	1058	1216	1029	973	2601
ENSG00000240553	0	0	0	0	0	0	1
ENSG00000263793	0	0	1	2	0	0	2
ENSG00000266802	0	0	0	0	0	0	1
ENSG00000169641	567	591	2019	1015	940	2342	2056
ENSG00000229010	0	0	0	0	1	0	5
ENSG00000206935	0	0	0	0	0	0	0
ENSG00000252578	0	0	0	0	0	0	0
ENSG00000179546	0	0	0	0	0	0	0
ENSG00000215381	0	0	0	0	0	0	0
ENSG00000261326	35	6	1	50	1	8	48
ENSG00000125944	1465	485	1368	1958	1735	2646	1795
ENSG00000125945	95	0	106	161	103	88	253
ENSG00000249087	10	5	7	42	5	2	29
ENSG00000201405	0	0	0	0	0	0	0
ENSG00000271420	0	0	0	0	0	0	0
ENSG00000204219	5	9	0	12	9	5	12
ENSG00000232482	0	0	0	0	0	0	0
ENSG00000088280	18	8	12	26	83	20	50
ENSG00000007968	573	86	119	852	397	188	155
ENSG00000235052	0	0	0	0	0	0	0
ENSG00000117318	23	149	98	43	89	49	91
ENSG00000197880	0	0	0	0	1	1	1
ENSG00000229239	0	0	0	0	0	0	0
ENSG00000142676	2317	3641	4343	3168	3853	5214	2970
ENSG00000203589	0	0	1	0	0	0	0
ENSG00000244609	0	0	0	0	0	0	1
ENSG00000011007	790	382	1348	1066	885	1565	698
ENSG00000236810	27	3	3	48	21	0	7
ENSG00000057757	391	380	523	520	501	2080	1293
ENSG00000011009	500	332	798	822	1146	944	996
ENSG00000117308	187	84	79	277	176	266	520
ENSG00000117305	333	61	104	587	187	255	195
ENSG00000179163	409	91	266	497	344	1191	149
ENSG00000188822	4	0	13	5	7	136	9
ENSG00000264347	0	0	1	0	0	2	0
ENSG00000238538	0	0	0	0	0	0	0
ENSG00000229106	0	20	8	5	3	20	2
ENSG00000232557	0	0	0	0	0	0	0
ENSG00000264926	0	0	0	0	0	0	0
ENSG00000230228	0	0	0	0	0	0	0
ENSG00000189266	310	296	412	396	332	711	317
ENSG00000188529	228	249	715	369	334	839	766
ENSG00000215905	0	0	0	0	0	0	0
ENSG00000225315	0	0	0	0	0	0	0
ENSG00000142661	0	11	1	0	0	0	0
ENSG00000230703	0	0	0	0	0	0	0
ENSG00000142677	0	0	0	0	0	0	0
ENSG00000185436	2	6	9	0	9	8	1
ENSG00000230023	0	0	0	0	0	0	0
ENSG00000221032	0	0	0	0	0	0	0
ENSG00000266511	0	0	0	0	0	0	0
ENSG00000232298	0	0	0	0	0	0	0
ENSG00000158055	2	0	3	1	1	3	0
ENSG00000001460	22	11	6	22	7	24	9
ENSG00000001461	204	28	87	308	217	109	264
ENSG00000117602	353	203	391	473	419	623	276
ENSG00000266551	0	0	0	0	0	0	0
ENSG00000264443	0	0	0	0	0	0	0
ENSG00000184454	0	0	0	0	0	0	0
ENSG00000227312	0	0	0	0	0	0	0
ENSG00000239106	0	0	0	0	0	0	0
ENSG00000133226	2529	1625	3580	3591	3426	4222	3330
ENSG00000238986	0	0	0	0	0	0	0
ENSG00000169504	678	317	974	804	863	1547	1238
ENSG00000238482	0	0	0	0	0	0	0
ENSG00000020633	1193	4749	6100	1577	3722	7074	2743
ENSG00000229162	1	6	12	0	4	17	6
ENSG00000261025	0	0	0	2	0	0	0
ENSG00000264371	1	9	9	4	14	20	40
ENSG00000233755	1	0	0	0	0	1	1
ENSG00000233419	0	0	0	0	0	0	0
ENSG00000231953	0	0	0	0	0	0	0
ENSG00000117614	573	502	893	940	691	1322	1070
ENSG00000117616	5175	900	2295	8289	3377	3933	4372
ENSG00000272432	8	3	7	12	11	18	5
ENSG00000261349	45	0	15	46	7	51	51
ENSG00000187010	0	0	0	0	9	10	2
ENSG00000224183	9	0	3	15	16	0	6
ENSG00000259984	43	0	16	47	16	54	36
ENSG00000183726	1287	517	1058	1837	1671	2275	1116
ENSG00000252515	26	0	14	38	7	17	25
ENSG00000238889	0	0	0	0	0	0	0
ENSG00000188672	0	3	1	2	1	5	0
ENSG00000238084	2	0	0	3	0	2	0
ENSG00000266468	0	0	0	0	0	0	0
ENSG00000204178	394	328	1054	647	658	1529	2423
ENSG00000157978	290	59	181	442	424	122	597
ENSG00000225643	4	0	4	9	5	0	33
ENSG00000117643	386	47	162	726	565	83	271
ENSG00000233478	0	0	0	0	0	1	0
ENSG00000162430	1106	1007	1787	1504	2043	2730	1375
ENSG00000255054	0	0	0	0	0	0	0
ENSG00000228172	7	0	9	6	4	6	15
ENSG00000117640	480	90	322	809	680	324	609
ENSG00000223474	6	6	21	16	22	17	43
ENSG00000272478	0	0	0	0	0	0	0
ENSG00000127423	10	12	65	9	49	22	59
ENSG00000236528	30	0	15	30	20	7	25
ENSG00000182749	404	88	495	633	419	156	496
ENSG00000207302	0	0	0	0	0	0	0
ENSG00000117632	23	11	25	38	77	29	81
ENSG00000229786	0	0	0	0	0	0	0
ENSG00000223624	0	0	0	0	0	0	0
ENSG00000264021	0	0	0	0	0	0	0
ENSG00000266763	0	0	0	0	0	0	0
ENSG00000158006	213	57	116	303	146	128	96
ENSG00000207237	0	0	0	0	0	0	0
ENSG00000252190	0	0	0	0	0	0	0
ENSG00000252691	0	0	0	0	0	0	0
ENSG00000158008	0	0	2	4	0	0	1
ENSG00000158014	0	0	0	0	0	0	0
ENSG00000158022	0	2	0	0	0	0	0
ENSG00000265320	0	0	0	0	0	0	0
ENSG00000175087	157	52	114	234	162	132	337
ENSG00000197245	0	0	0	1	0	0	0
ENSG00000142684	129	206	149	145	282	170	90
ENSG00000236782	0	0	0	0	5	0	0
ENSG00000142675	8	0	9	23	21	7	21
ENSG00000188782	0	0	0	0	0	0	2
ENSG00000236155	0	0	1	2	0	0	1
ENSG00000130695	556	769	1060	934	880	1848	1731
ENSG00000270733	0	0	0	0	8	6	10
ENSG00000142669	3394	6149	7614	5370	8726	18019	4718
ENSG00000158062	5042	3806	4259	8855	8719	4999	6472
ENSG00000169442	2368	2632	1252	2694	1759	4337	569
ENSG00000176092	7	6	1	6	8	1	2
ENSG00000225854	3	10	2	10	1	8	1
ENSG00000265143	0	0	0	0	0	0	0
ENSG00000176083	0	0	1	1	12	1	0
ENSG00000131914	0	0	0	0	0	1	0
ENSG00000117682	511	157	482	788	506	586	708
ENSG00000223583	3	0	0	19	10	2	2
ENSG00000225891	39	28	11	70	28	8	10
ENSG00000198830	2009	982	2632	2486	2263	2479	1084
ENSG00000224129	0	0	0	0	0	0	0
ENSG00000117676	2891	1411	2838	4140	4573	3024	3812
ENSG00000238705	0	0	0	0	1	0	0
ENSG00000243905	0	0	1	0	0	0	0
ENSG00000252802	0	0	0	0	0	0	0
ENSG00000229247	0	0	0	0	0	0	0
ENSG00000238316	0	0	0	1	0	0	0
ENSG00000235069	0	0	0	0	0	0	0
ENSG00000260063	11	6	7	23	17	9	19
ENSG00000117713	5629	2135	6841	8348	7592	9414	7189
ENSG00000266138	17	106	67	45	69	41	70
ENSG00000060642	161	43	101	249	164	130	249
ENSG00000241188	1	0	2	1	1	0	11
ENSG00000204160	857	669	1705	1258	1777	1545	2497
ENSG00000175793	12	20	28	16	24	26	149
ENSG00000226698	0	0	1	0	0	0	2
ENSG00000142751	381	286	776	657	460	538	830
ENSG00000198746	240	280	654	384	417	631	482
ENSG00000090273	298	346	348	491	534	500	402
ENSG00000131910	0	0	0	0	0	0	0
ENSG00000175707	0	0	1	0	1	2	0
ENSG00000172746	0	0	0	0	0	0	0
ENSG00000224064	0	0	0	0	0	0	1
ENSG00000225294	0	0	0	0	0	0	1
ENSG00000253368	54	584	129	101	151	174	346
ENSG00000158246	9	69	37	18	51	12	22
ENSG00000090020	1239	684	1622	1810	1901	1753	2651
ENSG00000229985	0	0	0	0	0	0	0
ENSG00000214973	0	0	0	0	0	0	0
ENSG00000225159	0	0	0	1	0	1	0
ENSG00000225990	0	0	0	0	0	0	0
ENSG00000224311	0	0	0	0	0	0	0
ENSG00000142784	1465	389	585	2109	2167	900	1183
ENSG00000252098	0	0	0	0	0	0	0
ENSG00000243659	10	0	1	20	3	2	21
ENSG00000186501	191	190	326	296	298	446	257
ENSG00000206888	4	0	1	4	0	1	1
ENSG00000241547	10	6	25	21	16	19	44
ENSG00000142765	1083	288	465	1847	1703	256	591
ENSG00000142733	342	98	162	607	480	192	273
ENSG00000142748	0	0	0	0	1	0	2
ENSG00000174950	0	0	1	1	1	0	7
ENSG00000231207	0	0	0	0	0	0	0
ENSG00000181773	1	3	0	0	21	22	7
ENSG00000158195	5786	2812	5521	8567	10272	7678	7218
ENSG00000241169	0	0	0	0	0	0	0
ENSG00000237429	1	0	2	5	5	2	1
ENSG00000126705	246	439	522	441	418	878	3025
ENSG00000000938	17370	6382	11108	25182	23749	11225	11607
ENSG00000235912	0	0	0	0	0	1	0
ENSG00000233975	0	0	0	0	0	1	3
ENSG00000126709	365	604	682	457	2178	1732	501
ENSG00000225886	0	0	0	2	0	0	0
ENSG00000206767	0	0	0	0	0	0	0
ENSG00000226662	0	0	0	0	0	0	0
ENSG00000207095	0	0	0	0	0	0	0
ENSG00000009780	307	163	377	390	349	384	1120
ENSG00000231344	3	0	2	14	5	2	20
ENSG00000230833	8	0	16	19	6	2	44
ENSG00000117758	1216	315	974	1715	1187	1972	2359
ENSG00000269971	38	6	38	64	15	43	67
ENSG00000270031	12	6	27	22	15	10	35
ENSG00000223062	3	0	7	3	3	2	8
ENSG00000117751	306	190	341	412	289	560	272
ENSG00000252947	20	56	23	25	34	39	49
ENSG00000268552	0	0	0	1	1	1	0
ENSG00000130775	10500	8591	13548	16099	17004	18633	13668
ENSG00000117748	388	33	261	514	264	400	88
ENSG00000130768	7	16	18	14	15	8	73
ENSG00000227050	1	0	1	14	2	0	0
ENSG00000158156	472	243	738	604	661	868	450
ENSG00000158161	603	100	252	886	488	330	463
ENSG00000238231	11	0	2	13	3	16	16
ENSG00000240750	4	3	2	10	4	10	15
ENSG00000228589	8	0	0	4	3	7	26
ENSG00000228943	0	0	0	0	0	0	0
ENSG00000214812	5	12	5	23	15	12	17
ENSG00000253005	5	3	0	10	4	14	10
ENSG00000252429	14	0	1	18	3	9	5
ENSG00000169403	3704	3010	2139	4762	4885	10477	1382
ENSG00000126698	639	422	506	812	610	1155	549
ENSG00000215902	1	0	1	3	1	2	0
ENSG00000269804	0	0	0	0	0	0	0
ENSG00000130770	177	66	59	225	148	163	158
ENSG00000270605	13	4	9	21	7	15	24
ENSG00000271398	0	0	2	1	2	5	3
ENSG00000130766	309	1197	1941	492	589	1961	1146
ENSG00000130772	158	268	129	199	122	97	48
ENSG00000204138	889	558	1414	1237	1263	1809	2181
ENSG00000206779	0	0	0	0	0	0	0
ENSG00000229820	8	0	9	25	13	24	23
ENSG00000221216	0	8	2	13	1	10	15
ENSG00000180198	253	201	255	350	281	269	226
ENSG00000242125	1502	2207	1977	2048	1905	2976	2771
ENSG00000200087	1247	5312	2550	1477	2733	3046	2647
ENSG00000238821	0	0	3	7	0	4	5
ENSG00000231468	0	0	0	0	0	0	1
ENSG00000180098	247	36	194	408	186	163	261
ENSG00000197989	381	94	106	750	122	535	623
ENSG00000221539	21	1	7	31	1	19	30
ENSG00000120656	317	116	223	387	254	293	212
ENSG00000188060	1	6	5	1	0	8	18
ENSG00000229388	6	7	8	6	2	7	0
ENSG00000270103	2175	2481	786	1563	1339	2071	1257
ENSG00000162419	519	709	1132	677	897	2029	496
ENSG00000252777	3	0	3	6	4	3	3
ENSG00000198492	1044	676	2021	1534	1509	2517	1687
ENSG00000116329	0	0	0	0	0	0	0
ENSG00000226852	0	0	0	0	0	0	0
ENSG00000233427	0	5	3	3	2	1	1
ENSG00000199756	0	0	0	0	0	0	0
ENSG00000159023	1842	423	1330	2625	2254	1010	2080
ENSG00000225616	0	0	0	0	0	0	0
ENSG00000206704	0	0	10	9	3	1	17
ENSG00000253304	1	5	0	3	0	1	4
ENSG00000225750	12	24	25	23	26	28	28
ENSG00000116350	989	926	1883	1571	1813	2697	2216
ENSG00000227637	0	0	0	0	0	0	0
ENSG00000116353	50	22	19	74	52	18	10
ENSG00000237934	0	0	0	0	0	0	0
ENSG00000060656	8	20	20	14	33	28	30
ENSG00000221550	0	0	0	0	0	0	0
ENSG00000230523	0	0	0	0	0	0	0
ENSG00000266678	0	0	0	0	0	0	0
ENSG00000225011	0	0	0	0	0	0	0
ENSG00000221126	0	0	0	0	0	0	0
ENSG00000228176	0	0	0	0	0	0	0
ENSG00000222787	0	0	0	0	0	0	0
ENSG00000270927	0	0	0	0	0	0	0
ENSG00000233399	0	0	0	0	0	0	0
ENSG00000233372	0	0	0	0	0	0	0
ENSG00000231251	0	0	0	0	0	0	0
ENSG00000236335	0	0	0	0	0	0	0
ENSG00000231949	0	0	0	0	0	0	0
ENSG00000162510	4	8	20	18	17	5	42
ENSG00000186056	37	26	23	87	37	46	74
ENSG00000162511	22804	28672	48628	28860	37196	77005	25977
ENSG00000264773	74	74	242	101	240	174	201
ENSG00000229607	0	0	0	0	0	0	0
ENSG00000223382	0	0	0	0	0	0	0
ENSG00000222784	0	0	0	0	0	0	0
ENSG00000235143	0	0	0	0	0	0	0
ENSG00000162512	77	188	371	112	520	1113	246
ENSG00000134644	2406	943	3218	3489	2428	4472	4325
ENSG00000200154	1	0	2	3	1	4	2
ENSG00000202107	9	2	19	16	9	24	26
ENSG00000200181	10	3	13	9	5	18	19
ENSG00000237329	0	0	0	0	0	0	0
ENSG00000232768	0	0	0	0	0	0	0
ENSG00000215900	0	0	0	0	0	0	0
ENSG00000225142	0	0	0	0	0	0	0
ENSG00000084628	0	0	0	0	0	3	0
ENSG00000060688	434	237	550	643	412	751	413
ENSG00000229447	22	0	36	29	25	41	23
ENSG00000121766	227	131	209	305	273	343	473
ENSG00000229044	0	0	0	0	0	0	0
ENSG00000121769	0	0	0	0	0	3	2
ENSG00000168528	227	482	261	353	228	484	180
ENSG00000268950	0	0	1	0	0	0	0
ENSG00000215899	0	0	0	0	0	0	0
ENSG00000206981	0	0	0	0	0	0	0
ENSG00000228682	0	0	0	0	2	0	0
ENSG00000223907	0	19	4	1	7	8	2
ENSG00000229167	0	0	0	0	0	0	0
ENSG00000142910	1	247	72	0	2	150	22
ENSG00000121764	0	55	17	0	5	35	2
ENSG00000162517	570	385	685	858	877	999	471
ENSG00000235790	14	6	15	17	23	27	15
ENSG00000264078	0	0	3	0	5	1	0
ENSG00000084636	0	0	0	0	0	0	0
ENSG00000121753	1	15	3	12	6	1	6
ENSG00000266580	0	0	0	0	0	0	0
ENSG00000254545	0	0	1	1	2	3	1
ENSG00000134668	0	0	0	0	0	4	1
ENSG00000203620	0	0	0	0	0	0	1
ENSG00000269967	116	18	147	208	163	75	275
ENSG00000184007	7665	7684	15554	9644	16216	20208	9402
ENSG00000212673	0	0	0	0	0	0	0
ENSG00000228634	0	0	0	0	0	0	0
ENSG00000121774	2027	921	2671	2736	2886	2631	3550
ENSG00000203325	3	0	1	0	0	2	3
ENSG00000121775	382	68	300	496	363	189	436
ENSG00000266203	6	4	1	5	3	2	10
ENSG00000025800	1351	607	1895	1810	1532	2680	2699
ENSG00000250135	0	0	0	0	0	0	0
ENSG00000084652	779	390	1220	1010	1508	1522	548
ENSG00000160050	23	8	20	25	27	9	33
ENSG00000224066	36	64	63	137	162	132	96
ENSG00000160051	20	40	10	17	9	28	26
ENSG00000222046	0	0	0	1	1	0	1
ENSG00000160055	286	149	140	427	336	319	295
ENSG00000084623	934	1288	1171	1115	1493	2178	807
ENSG00000220785	1	6	0	2	4	5	6
ENSG00000183615	0	0	2	1	0	8	8
ENSG00000182866	58	2	0	44	48	16	3
ENSG00000252450	0	0	0	0	0	1	0
ENSG00000116478	919	306	681	1152	1079	898	632
ENSG00000175130	600	2567	5098	689	2343	4539	1412
ENSG00000233775	1	0	3	1	4	2	6
ENSG00000162526	15	4	10	23	14	13	28
ENSG00000225828	215	232	809	396	465	528	706
ENSG00000160058	992	707	1519	1606	1197	1667	1859
ENSG00000224333	0	0	0	0	0	0	0
ENSG00000270850	0	0	0	0	0	0	0
ENSG00000229259	0	0	0	0	0	0	0
ENSG00000263529	0	0	0	0	0	0	0
ENSG00000254553	0	0	0	0	0	0	0
ENSG00000273274	0	0	1	3	0	0	0
ENSG00000160062	5	11	8	4	5	20	20
ENSG00000176261	272	104	220	435	287	335	204
ENSG00000200591	0	0	0	0	0	0	0
ENSG00000162521	2493	588	1978	3230	2821	1920	2323
ENSG00000162520	0	6	1	0	2	0	1
ENSG00000224409	0	0	0	0	0	1	0
ENSG00000162522	162	130	143	246	328	346	244
ENSG00000134684	854	654	1362	1348	1296	2417	3074
ENSG00000116497	687	51	236	1180	465	245	716
ENSG00000160097	0	0	0	0	0	0	0
ENSG00000121905	0	0	0	2	2	0	0
ENSG00000121900	0	16	0	0	0	0	3
ENSG00000221423	0	0	0	0	0	0	0
ENSG00000116514	1551	2422	5854	2074	3590	3163	2023
ENSG00000267885	0	0	2	3	0	1	1
ENSG00000217644	0	0	0	0	0	0	0
ENSG00000239670	0	0	0	0	0	0	0
ENSG00000236065	0	0	0	1	1	4	0
ENSG00000004455	1613	179	490	2117	1534	491	2084
ENSG00000142920	6	3	13	6	3	8	50
ENSG00000116525	283	184	701	449	421	690	1100
ENSG00000160094	325	270	599	506	659	635	416
ENSG00000270115	36	0	45	76	37	27	75
ENSG00000256142	0	0	0	0	0	0	0
ENSG00000184389	6	8	61	23	39	72	142
ENSG00000225313	1	0	0	0	0	1	6
ENSG00000134686	1596	3719	4765	2125	2794	8858	3501
ENSG00000266239	6	3	36	16	9	25	31
ENSG00000222112	52	13	135	67	31	83	128
ENSG00000233246	2	0	0	3	2	0	0
ENSG00000221225	0	0	0	0	0	0	0
ENSG00000234512	0	0	0	0	0	0	0
ENSG00000121903	34	0	12	38	14	14	9
ENSG00000235907	0	0	0	0	0	0	0
ENSG00000121904	0	0	0	0	0	0	0
ENSG00000227000	0	0	0	0	0	0	0
ENSG00000176256	0	0	0	0	0	0	0
ENSG00000231163	0	0	0	0	0	0	0
ENSG00000201148	0	0	0	0	0	0	0
ENSG00000142698	0	0	0	0	0	0	0
ENSG00000221053	0	0	0	0	0	0	0
ENSG00000270241	0	0	0	0	0	0	0
ENSG00000207941	0	0	0	0	0	0	0
ENSG00000163866	427	327	440	556	442	630	810
ENSG00000189280	0	0	0	0	0	0	0
ENSG00000189433	0	0	0	0	0	0	0
ENSG00000255811	0	0	0	0	1	0	0
ENSG00000216162	0	0	0	1	0	0	0
ENSG00000188910	0	0	0	0	0	0	0
ENSG00000187513	0	0	0	0	0	0	0
ENSG00000230163	0	0	0	0	1	0	0
ENSG00000116544	143	16	51	200	34	30	44
ENSG00000252728	0	0	0	0	0	0	0
ENSG00000241014	70	11	60	129	57	44	79
ENSG00000271741	0	0	0	0	0	0	0
ENSG00000243749	0	0	0	0	0	0	1
ENSG00000163867	707	203	629	1145	679	682	1116
ENSG00000233940	0	0	0	0	1	0	0
ENSG00000197056	184	8	53	315	121	77	115
ENSG00000228348	0	0	0	0	1	0	0
ENSG00000116560	8357	4999	12181	12041	11971	21071	17088
ENSG00000201868	1	0	0	3	1	1	1
ENSG00000263591	0	0	0	1	0	0	0
ENSG00000146463	1576	250	736	2299	1712	930	1394
ENSG00000240374	0	0	0	0	0	0	0
ENSG00000201542	1	0	3	10	1	8	12
ENSG00000229994	16	6	8	21	7	16	49
ENSG00000227409	0	0	0	0	0	0	0
ENSG00000202129	6	0	1	3	1	0	1
ENSG00000142687	1610	203	468	2819	1458	391	702
ENSG00000236274	0	0	0	0	0	0	2
ENSG00000020129	290	27	52	419	319	65	54
ENSG00000239636	63	16	42	66	74	9	23
ENSG00000116819	47	6	26	59	61	24	19
ENSG00000126067	1072	1029	1296	1196	1438	2393	1046
ENSG00000239859	0	0	2	0	0	0	0
ENSG00000142686	109	35	119	206	119	91	145
ENSG00000092853	22	6	46	32	54	52	31
ENSG00000232335	0	0	0	0	0	0	0
ENSG00000134698	4565	981	3147	7477	4650	3543	3129
ENSG00000092847	3850	2310	8538	6317	4682	5190	14233
ENSG00000271164	0	0	0	0	0	0	0
ENSG00000271914	11	0	5	5	1	1	1
ENSG00000126070	1775	508	1407	2861	1901	864	2514
ENSG00000271554	0	0	2	0	0	0	0
ENSG00000232862	0	0	0	1	2	1	0
ENSG00000092850	9	6	5	6	12	2	39
ENSG00000116863	272	108	209	384	352	252	253
ENSG00000171812	238	48	152	329	212	73	163
ENSG00000054116	420	163	301	593	444	439	284
ENSG00000116871	3338	5871	9850	4959	6231	8484	6612
ENSG00000264592	0	0	3	1	0	0	15
ENSG00000054118	2596	1179	1907	3530	2718	4910	3509
ENSG00000231849	0	0	0	0	0	0	0
ENSG00000214193	26	1446	180	48	131	517	1297
ENSG00000142694	67	266	131	95	217	279	204
ENSG00000116883	4	168	15	8	27	86	265
ENSG00000196182	1994	3337	2769	2654	3530	7346	3471
ENSG00000181817	379	128	252	497	454	452	362
ENSG00000222821	0	0	0	0	0	0	0
ENSG00000116885	7	0	21	12	6	21	150
ENSG00000201448	1	12	2	1	0	1	4
ENSG00000116898	469	199	513	673	373	539	896
ENSG00000119535	16414	10292	18844	30718	20435	20249	22749
ENSG00000230214	0	0	1	0	2	0	0
ENSG00000234481	0	0	0	0	0	0	0
ENSG00000163873	0	0	0	0	0	0	0
ENSG00000264698	0	0	0	0	0	0	0
ENSG00000207328	0	0	0	0	0	0	0
ENSG00000223944	0	0	0	0	0	0	0
ENSG00000252368	0	0	0	0	0	0	0
ENSG00000230451	0	0	0	0	0	0	0
ENSG00000233621	24	26	22	33	33	22	65
ENSG00000163874	608	1435	1779	1016	2043	2425	2556
ENSG00000163875	609	194	498	799	604	731	421
ENSG00000263675	5	0	12	8	3	8	9
ENSG00000163877	418	502	913	639	825	1617	1546
ENSG00000232273	0	0	0	0	0	0	0
ENSG00000237749	0	0	0	0	1	0	1
ENSG00000163879	0	0	0	2	0	0	1
ENSG00000134697	589	338	784	1040	1003	1167	688
ENSG00000169218	0	2	0	0	0	0	0
ENSG00000116922	54	3	43	84	41	24	70
ENSG00000134690	9	5	40	15	17	16	4
ENSG00000183317	0	0	0	0	0	0	0
ENSG00000200421	0	0	0	0	0	0	0
ENSG00000238871	0	0	0	0	0	0	0
ENSG00000214141	0	0	0	0	0	0	0
ENSG00000227416	0	0	0	0	0	0	0
ENSG00000185090	6	0	4	9	6	2	0
ENSG00000233728	4	0	7	12	8	1	14
ENSG00000196449	150	114	257	236	468	310	204
ENSG00000197982	73	147	195	93	222	247	88
ENSG00000188786	1580	545	1665	2308	1762	2861	2619
ENSG00000230610	5	0	5	17	5	6	12
ENSG00000235673	0	0	0	0	0	0	0
ENSG00000230955	3	0	1	0	1	2	0
ENSG00000204084	971	388	1502	1694	978	948	2218
ENSG00000252448	0	0	0	0	0	0	0
ENSG00000222282	0	0	0	0	0	0	0
ENSG00000183431	789	1250	3388	1349	1190	3389	7018
ENSG00000212541	1	0	0	0	0	0	0
ENSG00000183386	572	433	1964	815	690	1475	4088
ENSG00000183520	196	80	250	251	175	301	476
ENSG00000185668	0	0	1	1	0	2	1
ENSG00000224592	0	4	0	0	0	0	0
ENSG00000223589	0	0	0	0	0	0	0
ENSG00000265596	0	0	0	0	0	0	2
ENSG00000237290	0	0	0	0	0	0	0
ENSG00000200796	0	0	0	0	0	0	0
ENSG00000238063	0	0	0	0	0	0	0
ENSG00000215895	0	0	0	0	0	2	0
ENSG00000116954	535	140	587	684	464	980	591
ENSG00000228436	29	17	22	31	19	25	29
ENSG00000214114	176	22	80	175	219	47	63
ENSG00000131233	0	0	0	0	0	0	0
ENSG00000158315	0	0	0	0	0	0	0
ENSG00000199963	0	0	0	0	0	0	0
ENSG00000207466	0	0	0	0	0	0	0
ENSG00000235549	0	0	0	0	0	0	0
ENSG00000174574	1065	1320	2356	1411	1992	3486	2399
ENSG00000168653	143	53	170	214	188	152	131
ENSG00000127603	10341	1965	5618	18413	11747	10191	11912
ENSG00000206654	0	0	0	0	0	0	0
ENSG00000222378	0	0	0	0	0	0	0
ENSG00000270040	3	0	8	6	4	10	17
ENSG00000226438	0	0	0	0	0	0	0
ENSG00000217897	0	0	0	0	0	0	0
ENSG00000255103	314	101	272	659	515	362	732
ENSG00000183682	0	1	1	2	3	7	7
ENSG00000237624	0	0	6	0	0	4	0
ENSG00000182109	76	42	56	182	37	50	120
ENSG00000243970	29	0	21	94	16	45	52
ENSG00000090621	4450	4092	6088	5422	6632	9555	3977
ENSG00000228060	0	1	1	0	0	1	1
ENSG00000201457	57	56	68	99	104	133	47
ENSG00000163909	3	7	4	9	10	4	0
ENSG00000225903	0	0	0	0	0	0	0
ENSG00000116981	0	0	0	0	0	1	0
ENSG00000116983	3	50	2	4	13	16	6
ENSG00000084072	214	82	401	304	275	165	167
ENSG00000225333	0	0	0	0	0	0	0
ENSG00000252413	0	0	0	0	0	0	0
ENSG00000116985	47	36	33	58	75	30	147
ENSG00000198754	4	0	8	2	17	3	41
ENSG00000261798	3	0	2	6	6	2	2
ENSG00000229213	0	0	0	0	0	0	0
ENSG00000043514	380	69	328	571	218	160	785
ENSG00000202222	17	0	11	21	2	7	32
ENSG00000116990	815	85	881	1194	1312	300	618
ENSG00000236546	1	0	0	1	1	0	0
ENSG00000207356	0	0	0	0	0	0	0
ENSG00000168389	459	150	362	708	395	441	1448
ENSG00000228477	31	6	39	82	63	78	205
ENSG00000131236	7980	2086	3626	9381	9594	8661	4084
ENSG00000131238	4627	1418	4339	5451	3727	9477	2300
ENSG00000226745	0	0	0	0	0	0	0
ENSG00000117000	1212	1049	2461	1736	1465	4351	3071
ENSG00000207508	16	0	3	25	13	34	52
ENSG00000188800	2	0	1	3	0	4	3
ENSG00000259943	60	19	10	59	24	19	48
ENSG00000084073	559	61	237	646	532	313	224
ENSG00000231296	0	0	0	0	0	0	0
ENSG00000049089	204	135	286	321	253	40	202
ENSG00000227311	0	0	0	0	0	0	0
ENSG00000084070	6673	1290	3993	9604	10921	2762	3875
ENSG00000213172	88	18	58	209	167	39	70
ENSG00000187801	10	0	5	26	20	9	9
ENSG00000260920	10	9	2	31	14	6	9
ENSG00000187815	47	5	23	95	70	47	25
ENSG00000238287	4	0	1	3	2	0	3
ENSG00000164002	63	14	62	98	62	117	49
ENSG00000227278	0	0	0	0	0	0	0
ENSG00000238186	0	0	1	1	0	0	0
ENSG00000117010	40	11	99	47	56	80	46
ENSG00000236505	1	0	0	0	0	0	0
ENSG00000233910	0	0	0	0	0	0	1
ENSG00000117016	21	18	47	36	55	36	93
ENSG00000237899	3	17	8	7	5	1	1
ENSG00000272145	188	95	139	204	220	243	198
ENSG00000066136	932	411	855	1322	1260	1246	607
ENSG00000198974	2	10	5	2	2	7	2
ENSG00000207962	0	0	4	2	0	4	2
ENSG00000117013	2	4	12	19	37	5	12
ENSG00000264582	1	0	0	0	0	0	1
ENSG00000179862	196	403	254	343	520	333	449
ENSG00000229528	0	0	2	0	0	0	0
ENSG00000228940	1	0	0	0	0	0	3
ENSG00000233118	0	0	0	0	0	0	0
ENSG00000171793	204	101	230	327	333	524	206
ENSG00000171790	6	0	1	4	8	5	27
ENSG00000010803	130	106	280	229	302	334	430
ENSG00000215893	0	0	2	0	1	0	0
ENSG00000235358	0	13	4	5	17	1	16
ENSG00000213987	0	0	0	0	0	0	0
ENSG00000204060	10	16	3	12	28	25	19
ENSG00000229901	0	0	0	1	0	0	0
ENSG00000252563	0	0	0	0	0	0	0
ENSG00000127129	5	8	9	2	9	2	11
ENSG00000127124	1210	1227	2766	2158	3271	3430	1183
ENSG00000230881	0	0	0	0	0	0	0
ENSG00000230638	0	0	0	0	0	0	0
ENSG00000264896	0	0	0	0	0	0	0
ENSG00000227538	0	0	0	0	0	0	0
ENSG00000228776	0	0	0	0	0	0	0
ENSG00000044012	0	0	0	0	0	0	0
ENSG00000197273	0	0	0	1	0	0	5
ENSG00000198815	1415	748	2037	1979	1759	3647	3219
ENSG00000227527	0	0	0	0	0	0	1
ENSG00000177181	0	0	0	0	1	0	0
ENSG00000235002	0	0	0	0	0	0	0
ENSG00000066185	13	0	1	14	14	3	7
ENSG00000127125	526	187	337	655	557	405	274
ENSG00000186409	76	19	13	160	91	22	29
ENSG00000230116	0	0	0	0	0	0	0
ENSG00000236876	0	1	2	0	0	2	0
ENSG00000200254	0	0	0	4	0	0	0
ENSG00000236180	0	0	0	0	3	1	0
ENSG00000171960	148	66	234	231	176	203	128
ENSG00000234917	0	0	6	3	2	1	1
ENSG00000065978	3056	3268	4409	4270	5128	7599	3057
ENSG00000164007	1	0	2	0	0	0	12
ENSG00000117385	604	128	308	1022	543	332	872
ENSG00000164008	116	67	148	178	145	126	176
ENSG00000228452	0	0	0	0	0	0	0
ENSG00000177868	94	82	161	103	185	223	88
ENSG00000164010	556	139	449	774	571	316	203
ENSG00000228192	2	0	1	2	1	1	1
ENSG00000164011	23	5	19	68	30	18	17
ENSG00000233708	0	0	0	0	0	0	0
ENSG00000237090	0	0	0	1	0	0	0
ENSG00000225099	0	0	0	0	0	1	0
ENSG00000117394	52	819	187	68	236	810	293
ENSG00000227533	1	0	0	0	1	3	7
ENSG00000207256	0	0	0	0	0	0	0
ENSG00000252803	0	0	0	0	0	0	0
ENSG00000186973	0	0	0	0	0	0	0
ENSG00000117395	114	89	121	135	195	150	45
ENSG00000243710	3	0	0	5	19	0	0
ENSG00000199240	0	0	0	0	0	0	0
ENSG00000179178	0	0	2	0	0	0	0
ENSG00000253313	0	0	1	0	2	0	13
ENSG00000066056	10	0	4	12	5	5	3
ENSG00000117400	1	2	4	3	6	1	2
ENSG00000234694	9	6	11	30	9	8	41
ENSG00000117399	0	0	3	2	2	6	3
ENSG00000066322	822	363	776	1076	880	1024	563
ENSG00000159479	284	115	243	367	305	408	320
ENSG00000229431	2	0	1	9	7	0	1
ENSG00000198198	2691	1309	2113	5577	3858	2627	3356
ENSG00000229372	0	0	0	2	1	0	1
ENSG00000178922	13	37	38	47	51	21	47
ENSG00000229348	7	0	10	14	4	15	25
ENSG00000142949	2	5	4	2	0	3	0
ENSG00000066135	903	362	1264	1403	1293	1218	1199
ENSG00000236200	1	0	1	5	4	1	1
ENSG00000126091	88	69	81	176	157	53	126
ENSG00000229444	0	0	0	0	0	0	0
ENSG00000252201	2	0	1	4	3	3	8
ENSG00000233674	4	3	2	2	3	3	12
ENSG00000224751	0	0	0	0	0	0	0
ENSG00000117407	6	1	2	8	4	3	2
ENSG00000237950	6	0	2	7	0	1	1
ENSG00000117408	398	61	81	564	346	94	56
ENSG00000132768	180	58	83	248	248	73	38
ENSG00000117410	2560	3498	5133	3483	4527	5921	3905
ENSG00000117411	20	10	27	62	23	26	79
ENSG00000159214	53	13	11	87	108	27	27
ENSG00000196517	0	0	3	0	4	3	1
ENSG00000230615	1	0	0	0	0	2	0
ENSG00000227163	0	0	0	0	0	0	0
ENSG00000271647	0	0	0	0	0	0	0
ENSG00000239560	0	0	0	0	0	0	0
ENSG00000171872	0	0	0	0	0	0	0
ENSG00000233514	1	3	0	0	0	0	0
ENSG00000239275	0	0	0	0	0	0	0
ENSG00000226804	0	0	0	0	0	0	0
ENSG00000200171	0	0	0	0	0	0	0
ENSG00000238037	0	0	0	0	0	0	0
ENSG00000227994	0	0	0	0	0	0	0
ENSG00000271329	0	0	0	0	0	0	0
ENSG00000178028	462	172	558	735	629	502	324
ENSG00000117419	233	87	166	354	286	165	151
ENSG00000233602	13	0	6	34	7	4	2
ENSG00000252146	1	0	1	2	0	0	1
ENSG00000199385	0	0	0	0	0	0	0
ENSG00000187147	1293	916	1955	1773	1736	1865	1251
ENSG00000263381	0	0	0	1	0	0	0
ENSG00000126106	65	4	21	81	41	26	33
ENSG00000198520	306	253	270	478	393	431	252
ENSG00000199377	1103	316	363	932	654	1141	798
ENSG00000200169	369	97	177	373	330	545	381
ENSG00000142945	1	2	6	2	8	9	4
ENSG00000225721	11	4	19	13	16	17	12
ENSG00000142937	5083	4395	6605	5949	6699	10479	4807
ENSG00000264294	0	0	0	0	0	0	0
ENSG00000200913	15	36	19	34	23	33	33
ENSG00000202031	0	0	0	0	0	0	0
ENSG00000207421	0	0	0	0	0	0	0
ENSG00000234093	2	0	1	0	0	1	1
ENSG00000142959	2	4	24	6	15	34	10
ENSG00000173846	2013	8035	5226	3178	6820	7313	4720
ENSG00000188396	174	141	131	229	176	239	131
ENSG00000222009	612	1370	1298	815	1552	1872	1250
ENSG00000117425	120	47	34	116	90	50	87
ENSG00000202444	0	0	0	0	0	0	0
ENSG00000226499	2	0	2	5	3	0	3
ENSG00000070785	161	16	68	274	145	30	85
ENSG00000266294	1	0	2	2	1	0	1
ENSG00000253039	0	0	0	0	0	0	0
ENSG00000229815	0	0	0	0	0	0	0
ENSG00000232369	0	0	0	0	0	2	0
ENSG00000268949	0	0	0	0	0	0	0
ENSG00000126107	754	393	659	1170	991	658	1115
ENSG00000126088	257	76	167	366	246	160	309
ENSG00000162415	3	0	8	1	5	1	7
ENSG00000264650	0	0	0	0	0	0	0
ENSG00000234315	1	0	0	0	0	0	0
ENSG00000221707	1	0	0	0	0	1	0
ENSG00000186603	0	0	1	1	3	1	0
ENSG00000132781	245	120	219	382	408	202	166
ENSG00000132773	281	183	505	410	506	300	313
ENSG00000070759	198	13	115	253	248	71	264
ENSG00000238945	1	0	0	1	0	0	1
ENSG00000236872	1	0	1	0	0	1	1
ENSG00000236624	48	0	15	71	78	17	9
ENSG00000132763	30	0	1	43	24	2	1
ENSG00000117450	919	133	388	1023	770	517	279
ENSG00000234379	0	0	0	0	0	0	0
ENSG00000117448	855	251	572	1144	989	489	338
ENSG00000132780	414	62	583	740	754	529	629
ENSG00000159588	243	21	318	498	238	318	845
ENSG00000159592	2990	1165	3019	4232	3445	5465	4317
ENSG00000225447	29	0	23	70	12	60	121
ENSG00000234329	105	34	166	167	99	175	251
ENSG00000159596	287	64	128	430	228	128	116
ENSG00000197429	31	11	33	60	61	40	3
ENSG00000230896	2	8	4	1	5	2	1
ENSG00000236111	0	0	0	0	1	0	0
ENSG00000086015	428	193	309	822	523	399	894
ENSG00000232467	0	0	0	0	0	0	0
ENSG00000117461	57	1	6	77	21	7	39
ENSG00000226957	0	0	0	2	1	2	13
ENSG00000233114	0	0	0	0	0	0	2
ENSG00000227857	0	0	0	0	0	0	2
ENSG00000117472	0	0	0	0	0	0	1
ENSG00000250719	0	0	0	0	0	0	0
ENSG00000085998	166	17	86	301	225	58	65
ENSG00000171357	0	0	2	4	0	0	2
ENSG00000085999	6	6	7	4	8	6	3
ENSG00000132128	859	375	704	1268	1024	1232	1550
ENSG00000173660	342	276	434	440	443	570	409
ENSG00000117481	490	211	839	753	871	626	325
ENSG00000225779	7	6	25	11	8	18	9
ENSG00000117480	382	110	279	671	435	93	271
ENSG00000232022	5	0	2	13	5	0	3
ENSG00000224863	0	0	0	0	0	0	0
ENSG00000225667	0	0	0	0	0	0	0
ENSG00000197587	0	2	1	0	0	2	0
ENSG00000269956	0	0	0	0	1	0	0
ENSG00000162456	2	0	0	0	0	0	5
ENSG00000079277	1228	986	1122	2095	1883	2270	2228
ENSG00000142961	505	355	413	950	1013	568	668
ENSG00000123472	191	83	125	303	252	152	327
ENSG00000159658	2576	803	2128	3193	3154	2117	2045
ENSG00000233647	4	0	10	12	5	13	37
ENSG00000186118	0	0	1	0	0	0	0
ENSG00000228237	0	0	0	0	0	0	0
ENSG00000236476	0	0	0	0	0	0	0
ENSG00000142973	0	0	0	0	0	0	0
ENSG00000154198	0	0	0	0	0	0	0
ENSG00000238145	0	0	0	0	0	0	0
ENSG00000187048	0	0	0	0	0	0	0
ENSG00000186377	0	0	0	0	0	0	0
ENSG00000259832	0	0	0	0	0	0	0
ENSG00000261196	0	0	0	0	0	0	0
ENSG00000261593	0	0	0	0	0	0	0
ENSG00000261290	0	0	0	0	0	0	0
ENSG00000186160	0	0	0	0	0	0	0
ENSG00000225154	0	0	0	0	0	0	0
ENSG00000225506	0	0	0	0	0	0	0
ENSG00000162365	0	0	0	0	0	0	0
ENSG00000225514	0	0	0	0	0	0	0
ENSG00000224805	1	0	0	0	1	0	0
ENSG00000162366	0	0	3	0	9	3	2
ENSG00000162367	10	3	10	11	42	38	10
ENSG00000226252	0	0	0	0	0	0	0
ENSG00000123473	83	73	108	99	135	190	72
ENSG00000162368	1397	924	1795	1715	2073	2078	1226
ENSG00000225762	0	0	0	0	1	0	0
ENSG00000186790	2	2	0	1	1	0	0
ENSG00000237424	32	5	23	62	47	32	96
ENSG00000186564	13	7	25	12	14	15	12
ENSG00000271355	0	0	0	0	0	0	0
ENSG00000229554	0	0	0	0	0	0	0
ENSG00000221346	0	0	0	0	0	0	0
ENSG00000227883	0	0	0	0	0	0	0
ENSG00000221447	0	0	0	0	0	0	0
ENSG00000227947	0	0	0	0	0	0	0
ENSG00000269113	0	0	0	0	0	0	0
ENSG00000223814	0	0	0	0	0	0	0
ENSG00000273395	0	0	0	0	0	0	0
ENSG00000225028	0	0	0	0	0	0	0
ENSG00000226133	0	0	0	0	0	0	0
ENSG00000231413	0	0	0	0	0	0	0
ENSG00000237180	0	0	0	0	0	0	0
ENSG00000242267	0	0	1	1	1	0	1
ENSG00000269709	0	0	0	0	0	0	0
ENSG00000223720	0	0	0	0	0	0	0
ENSG00000117834	7	0	2	5	6	2	2
ENSG00000272491	15	0	7	14	28	2	10
ENSG00000132122	404	120	183	586	586	178	375
ENSG00000224986	10	0	5	37	32	7	19
ENSG00000206700	0	0	0	0	0	0	0
ENSG00000235105	1	0	0	0	0	0	0
ENSG00000223175	0	0	0	0	0	0	0
ENSG00000232514	0	0	0	0	0	0	0
ENSG00000186094	0	0	0	0	0	0	0
ENSG00000162373	2	9	6	1	0	2	4
ENSG00000229846	0	0	0	0	0	0	0
ENSG00000239144	0	0	0	0	0	0	0
ENSG00000230114	0	0	0	0	0	0	0
ENSG00000225623	0	0	0	0	0	0	0
ENSG00000237478	0	0	0	0	0	0	0
ENSG00000215887	0	0	0	0	0	0	0
ENSG00000221746	0	0	0	0	0	0	0
ENSG00000227839	0	0	0	0	0	0	0
ENSG00000233595	0	0	0	0	0	0	0
ENSG00000162374	3	0	0	1	4	0	0
ENSG00000230828	0	0	0	0	0	0	0
ENSG00000237337	0	0	0	0	0	0	0
ENSG00000233407	0	0	0	0	0	0	0
ENSG00000234080	0	0	0	0	0	0	0
ENSG00000229316	0	0	0	0	0	0	0
ENSG00000225671	0	0	0	0	0	0	1
ENSG00000142700	1	3	0	0	0	0	6
ENSG00000271782	7	0	0	6	5	3	5
ENSG00000185104	630	194	443	1039	732	548	723
ENSG00000225767	0	0	0	0	0	0	0
ENSG00000202140	5	0	2	4	1	6	7
ENSG00000207194	0	0	0	0	0	0	0
ENSG00000252825	0	0	0	0	0	0	0
ENSG00000230585	0	0	0	0	0	0	0
ENSG00000237130	0	0	0	0	0	0	0
ENSG00000123080	78	21	104	92	59	101	126
ENSG00000265538	0	0	0	0	0	0	0
ENSG00000204006	0	0	0	0	0	0	0
ENSG00000200262	0	0	0	0	0	0	0
ENSG00000213478	0	0	0	0	0	1	0
ENSG00000239101	0	0	0	0	0	0	0
ENSG00000221492	0	0	0	0	0	0	0
ENSG00000203356	1	0	0	0	0	0	0
ENSG00000238618	0	0	0	0	0	0	0
ENSG00000123091	847	2285	2870	1235	2214	4891	2079
ENSG00000233406	0	2	2	2	2	0	2
ENSG00000236434	0	0	0	0	1	0	0
ENSG00000085831	0	0	4	5	15	2	6
ENSG00000261664	0	4	2	1	0	0	2
ENSG00000085832	2979	783	2692	4413	3438	2795	4608
ENSG00000232027	0	0	0	0	0	0	0
ENSG00000206595	0	0	0	0	0	0	0
ENSG00000238140	0	0	0	0	0	0	0
ENSG00000227070	0	0	0	2	2	2	2
ENSG00000252032	0	0	0	0	0	0	0
ENSG00000227742	0	0	0	0	0	0	0
ENSG00000117859	1734	450	2220	2698	1957	3105	4022
ENSG00000236973	0	0	0	0	0	0	0
ENSG00000232846	19	5	72	33	39	38	44
ENSG00000212624	0	0	0	0	0	0	0
ENSG00000078618	2048	599	615	3297	2376	1545	1062
ENSG00000266993	89	16	137	151	159	270	507
ENSG00000272175	7	0	10	12	29	29	56
ENSG00000212076	0	0	0	0	0	0	0
ENSG00000230604	0	0	0	0	0	0	0
ENSG00000212174	0	0	0	0	0	0	0
ENSG00000265769	0	0	0	0	0	0	0
ENSG00000169213	1	0	0	2	0	2	0
ENSG00000200839	0	0	0	0	0	0	0
ENSG00000229032	0	0	0	0	0	0	0
ENSG00000264613	0	0	0	0	0	0	0
ENSG00000117862	628	193	696	745	860	864	469
ENSG00000198841	159	87	221	190	211	206	137
ENSG00000223390	5	6	1	4	2	2	2
ENSG00000228369	0	0	0	0	0	0	0
ENSG00000134717	961	494	917	1191	1095	2074	911
ENSG00000157077	5	79	36	6	5	293	22
ENSG00000241745	1	4	4	1	1	14	3
ENSG00000228407	0	0	0	0	0	0	0
ENSG00000223429	0	0	0	0	0	0	0
ENSG00000224255	1	12	4	0	4	9	3
ENSG00000236004	0	0	0	0	0	0	0
ENSG00000237663	0	0	0	0	0	0	0
ENSG00000213735	0	0	0	1	0	8	0
ENSG00000154222	852	1106	1022	1500	1371	1782	1606
ENSG00000272100	0	0	1	0	0	0	0
ENSG00000224680	2	0	0	2	1	0	0
ENSG00000085840	15	18	88	16	47	34	70
ENSG00000134748	766	569	888	1159	951	1078	826
ENSG00000134744	871	1181	2491	1418	734	2987	4927
ENSG00000239063	12	8	20	23	32	20	31
ENSG00000272371	0	0	2	1	0	4	1
ENSG00000236290	0	0	0	0	0	0	0
ENSG00000116157	37	39	90	51	28	54	28
ENSG00000182183	16	131	83	11	7	24	15
ENSG00000162377	63	31	106	109	51	107	99
ENSG00000233664	0	0	0	0	0	0	0
ENSG00000239640	0	0	0	0	0	0	0
ENSG00000162378	1241	358	1279	1594	1205	1280	1255
ENSG00000252018	0	6	0	2	0	0	0
ENSG00000228929	1	1	1	4	2	7	1
ENSG00000206627	0	0	0	0	0	0	0
ENSG00000203995	0	0	2	0	0	1	5
ENSG00000242391	0	0	0	0	0	0	0
ENSG00000121310	161	40	127	259	195	54	45
ENSG00000230953	0	0	0	0	0	0	0
ENSG00000231866	0	0	1	0	0	1	0
ENSG00000116171	914	289	567	1152	1187	781	427
ENSG00000264834	0	0	1	2	1	2	1
ENSG00000266188	0	0	0	0	0	0	0
ENSG00000265815	0	0	0	2	0	0	0
ENSG00000237279	0	0	0	0	0	0	0
ENSG00000236360	0	0	0	0	1	0	0
ENSG00000226147	0	0	0	0	3	0	1
ENSG00000174348	6	0	3	5	5	2	2
ENSG00000232993	0	0	0	0	0	0	0
ENSG00000227644	0	0	0	0	0	0	0
ENSG00000162383	3	0	3	7	6	0	0
ENSG00000235563	0	0	0	0	0	0	0
ENSG00000157184	279	61	159	317	186	294	85
ENSG00000236723	3	0	1	8	1	2	1
ENSG00000162384	271	28	77	355	239	79	100
ENSG00000259818	16	0	2	10	3	1	9
ENSG00000162385	131	68	139	154	177	233	270
ENSG00000226754	2	10	6	11	6	5	5
ENSG00000270172	20	15	35	37	26	83	220
ENSG00000157193	256	103	340	372	250	351	1005
ENSG00000234578	0	0	0	0	0	0	0
ENSG00000228838	0	0	0	0	0	0	0
ENSG00000225030	3	8	3	1	5	2	8
ENSG00000232762	0	0	0	0	0	0	0
ENSG00000225675	3	0	1	2	1	1	0
ENSG00000226938	0	0	0	0	0	1	0
ENSG00000230138	6	0	1	19	14	2	3
ENSG00000236253	0	0	0	0	0	0	0
ENSG00000143006	0	0	0	0	0	0	0
ENSG00000174332	0	0	0	0	0	0	0
ENSG00000239007	0	0	0	0	0	0	0
ENSG00000058804	230	52	129	327	286	145	146
ENSG00000201003	0	0	0	0	1	3	1
ENSG00000264454	0	0	0	1	0	0	0
ENSG00000229687	0	0	0	0	0	0	0
ENSG00000058799	342	70	314	457	382	371	279
ENSG00000211452	1	13	2	5	2	0	0
ENSG00000081870	132	0	91	205	132	74	343
ENSG00000116212	82	31	128	133	119	136	192
ENSG00000219102	0	0	0	0	2	0	0
ENSG00000203985	0	0	0	0	1	0	0
ENSG00000197015	0	0	0	0	0	0	0
ENSG00000272091	37	11	97	58	67	60	54
ENSG00000116209	1361	468	1469	1675	1330	2159	1048
ENSG00000203276	46	48	113	82	53	49	101
ENSG00000116205	228	46	44	328	142	37	59
ENSG00000264208	2	0	0	1	0	0	0
ENSG00000225183	2	0	0	1	0	0	0
ENSG00000237611	0	0	0	0	0	0	0
ENSG00000212670	22	0	4	33	28	2	7
ENSG00000157211	0	0	0	4	1	0	1
ENSG00000256407	0	0	0	3	0	0	0
ENSG00000248835	8	0	7	18	26	0	5
ENSG00000215883	34	6	16	72	27	3	14
ENSG00000116221	309	358	451	420	429	523	405
ENSG00000157216	612	540	624	866	716	1724	1904
ENSG00000198711	0	11	7	0	2	8	14
ENSG00000225632	0	0	0	0	0	0	1
ENSG00000232245	0	0	0	0	0	0	0
ENSG00000265404	0	0	0	0	0	0	0
ENSG00000235741	0	0	0	0	0	0	0
ENSG00000237173	0	0	0	0	0	0	0
ENSG00000252646	0	0	0	0	0	0	0
ENSG00000227453	0	0	0	0	0	2	0
ENSG00000162390	108	44	53	228	101	69	174
ENSG00000162391	1	0	0	0	0	0	0
ENSG00000230728	0	0	0	0	0	0	0
ENSG00000271723	2	0	0	0	1	2	0
ENSG00000184313	2	0	3	17	17	8	35
ENSG00000243725	15	13	6	22	19	16	15
ENSG00000162396	18	0	1	23	5	4	2
ENSG00000006555	10	0	1	15	10	7	1
ENSG00000237453	0	0	0	0	0	0	1
ENSG00000162398	4	0	0	2	4	0	1
ENSG00000116133	35	10	24	48	60	61	5
ENSG00000242396	0	0	0	0	0	0	0
ENSG00000233203	0	0	0	0	0	0	0
ENSG00000143001	0	0	0	0	0	0	0
ENSG00000233271	0	0	0	0	0	0	0
ENSG00000162399	0	0	0	0	0	1	0
ENSG00000169174	0	0	0	0	0	0	0
ENSG00000162402	3558	1956	5797	6325	4390	9763	10980
ENSG00000231090	1	0	0	0	0	0	1
ENSG00000231095	0	0	0	2	0	1	0
ENSG00000265822	0	0	0	0	0	0	1
ENSG00000231900	0	0	0	0	0	0	0
ENSG00000232198	0	0	0	0	0	0	0
ENSG00000199831	1	0	0	0	1	0	0
ENSG00000252162	0	0	0	0	0	0	0
ENSG00000272051	0	0	0	0	0	0	0
ENSG00000234810	0	0	0	0	0	0	0
ENSG00000233147	0	0	0	0	0	0	0
ENSG00000230250	0	0	0	0	0	0	0
ENSG00000227104	0	0	0	0	0	0	0
ENSG00000233079	0	0	0	0	0	0	0
ENSG00000235612	0	0	0	0	0	0	0
ENSG00000229871	0	0	0	0	0	0	0
ENSG00000260971	0	0	0	0	0	1	0
ENSG00000223307	0	0	0	0	0	0	0
ENSG00000223956	0	0	0	0	0	0	0
ENSG00000162407	21	913	395	37	36	700	23
ENSG00000236776	0	0	0	0	0	0	0
ENSG00000224980	0	0	0	0	0	0	0
ENSG00000225475	0	0	0	0	0	0	0
ENSG00000162409	0	0	0	0	0	0	0
ENSG00000187889	0	0	0	0	0	0	0
ENSG00000229913	0	0	0	0	0	0	0
ENSG00000157131	0	0	0	0	0	0	0
ENSG00000021852	0	0	0	0	0	0	0
ENSG00000236341	0	0	0	0	0	0	0
ENSG00000221591	0	0	0	0	0	0	0
ENSG00000173406	0	0	0	0	3	0	0
ENSG00000227935	0	0	0	0	0	0	0
ENSG00000236888	0	0	0	0	0	0	0
ENSG00000238773	0	0	0	0	0	0	0
ENSG00000226759	0	0	0	0	0	0	0
ENSG00000229887	1	0	0	0	0	0	0
ENSG00000223416	0	0	1	0	0	0	0
ENSG00000235038	0	0	0	0	0	0	0
ENSG00000230546	0	0	0	0	0	0	0
ENSG00000233216	0	0	0	0	0	0	1
ENSG00000162600	263	54	99	348	396	229	99
ENSG00000270209	0	0	0	0	0	0	0
ENSG00000264128	0	0	0	0	0	0	0
ENSG00000184292	0	10	22	1	0	2	0
ENSG00000185839	1	0	1	1	2	0	1
ENSG00000162601	1604	621	2097	2473	1449	3600	2455
ENSG00000222168	0	0	0	0	0	0	0
ENSG00000264081	0	0	0	0	0	0	0
ENSG00000177606	42794	11917	7498	35665	6260	22737	11700
ENSG00000234807	89	12	6	58	12	42	13
ENSG00000272226	0	0	0	1	0	0	0
ENSG00000231740	0	0	0	0	0	0	0
ENSG00000232453	8	50	4	9	4	29	5
ENSG00000228121	0	0	0	0	0	0	0
ENSG00000230812	0	0	0	0	1	2	0
ENSG00000241042	0	0	0	0	0	0	0
ENSG00000235215	0	0	0	0	0	0	0
ENSG00000237352	0	0	0	0	0	0	0
ENSG00000224609	0	0	1	0	2	1	1
ENSG00000270457	0	0	3	1	0	1	1
ENSG00000172456	90	30	44	160	73	65	46
ENSG00000266150	0	0	0	0	0	0	0
ENSG00000226883	0	0	0	0	0	0	0
ENSG00000231816	1	0	0	2	0	1	4
ENSG00000134709	1	0	0	3	0	4	0
ENSG00000134716	0	0	0	0	0	0	0
ENSG00000265535	0	0	0	0	0	0	0
ENSG00000162598	0	0	0	0	0	0	0
ENSG00000229332	0	0	0	0	0	0	0
ENSG00000238242	0	0	0	0	0	0	0
ENSG00000226476	0	0	1	0	0	2	0
ENSG00000231252	0	0	0	0	0	0	0
ENSG00000162599	304	38	133	447	283	69	108
ENSG00000237928	0	0	0	0	0	0	0
ENSG00000263380	1	0	0	1	0	0	0
ENSG00000270742	16	0	5	22	6	6	9
ENSG00000237853	0	0	0	0	0	0	0
ENSG00000264551	0	0	0	0	0	0	0
ENSG00000223920	0	0	0	0	0	0	0
ENSG00000162604	503	138	458	827	408	557	416
ENSG00000271200	1	0	0	0	0	0	2
ENSG00000132849	31	0	2	40	8	4	9
ENSG00000200575	0	0	0	0	0	0	0
ENSG00000212360	0	0	0	0	0	0	0
ENSG00000236646	0	0	0	0	0	0	0
ENSG00000242860	0	0	0	0	0	0	0
ENSG00000263908	0	0	0	0	0	0	0
ENSG00000234204	0	0	0	0	0	0	0
ENSG00000234088	0	0	0	0	0	0	0
ENSG00000240563	35	7	6	58	59	30	15
ENSG00000237227	0	0	0	0	0	0	0
ENSG00000200174	0	0	0	0	0	0	0
ENSG00000132854	0	9	0	0	1	2	0
ENSG00000201153	0	0	0	0	0	0	0
ENSG00000162607	592	171	496	747	658	813	531
ENSG00000116641	379	92	145	636	335	436	246
ENSG00000270549	0	0	0	0	0	0	0
ENSG00000132855	0	0	0	0	0	0	0
ENSG00000269624	0	0	0	0	0	0	0
ENSG00000213703	4	7	9	9	8	19	4
ENSG00000235545	0	0	4	0	0	6	0
ENSG00000125703	278	46	53	372	123	62	94
ENSG00000234318	0	0	0	0	0	0	0
ENSG00000237163	0	0	0	0	0	0	0
ENSG00000229537	0	0	0	0	0	0	0
ENSG00000227485	0	0	0	0	0	0	0
ENSG00000229225	0	0	0	0	0	0	0
ENSG00000203605	0	0	0	0	1	0	0
ENSG00000271593	0	0	0	0	0	0	0
ENSG00000252259	0	0	0	0	0	0	0
ENSG00000224209	0	0	0	1	0	0	0
ENSG00000228734	0	0	0	0	0	0	0
ENSG00000223683	0	0	0	0	0	0	0
ENSG00000230798	0	0	0	0	0	6	0
ENSG00000187140	0	0	0	0	0	4	0
ENSG00000252784	0	0	0	0	0	0	0
ENSG00000236674	0	0	0	0	0	0	0
ENSG00000088035	234	41	100	429	221	76	95
ENSG00000142856	78	15	35	121	75	41	21
ENSG00000203965	38	1	24	54	18	17	11
ENSG00000264271	0	0	0	0	0	0	0
ENSG00000251720	0	0	0	0	0	0	0
ENSG00000116652	2	0	0	7	4	0	1
ENSG00000079739	449	149	463	568	418	362	350
ENSG00000244256	8	0	8	9	4	8	21
ENSG00000185483	0	1	1	1	1	0	0
ENSG00000177452	0	0	0	0	0	0	0
ENSG00000228056	0	0	0	0	0	0	0
ENSG00000207190	0	0	0	0	0	0	0
ENSG00000200508	0	0	0	0	0	0	0
ENSG00000223949	0	0	0	0	0	0	0
ENSG00000177414	0	0	0	0	0	0	0
ENSG00000238653	0	0	0	0	0	0	0
ENSG00000158966	12	5	10	17	8	3	4
ENSG00000264470	0	0	0	0	0	0	0
ENSG00000162437	39	16	46	61	60	72	90
ENSG00000162434	5162	2528	5419	6985	6899	8257	5428
ENSG00000234784	0	0	1	0	0	0	0
ENSG00000233877	0	0	0	0	0	0	0
ENSG00000226891	51	1	7	113	39	27	5
ENSG00000185031	22	0	1	44	5	0	2
ENSG00000272506	9	0	1	15	3	0	0
ENSG00000212257	3	0	0	15	0	0	1
ENSG00000265996	15	0	5	16	4	7	18
ENSG00000199135	1	0	0	0	0	1	1
ENSG00000231485	6	6	2	14	3	2	5
ENSG00000235804	0	0	0	0	0	1	0
ENSG00000234496	0	0	0	0	0	0	0
ENSG00000162433	37	35	57	66	67	188	91
ENSG00000231622	1	0	1	4	5	4	4
ENSG00000116675	1	4	1	8	11	9	4
ENSG00000229294	0	0	0	0	0	0	0
ENSG00000234144	0	0	0	0	0	0	0
ENSG00000222624	0	0	0	0	0	0	0
ENSG00000116678	106	24	31	127	136	72	47
ENSG00000213625	1493	697	1386	2001	1366	3607	1687
ENSG00000237852	5	0	3	10	5	1	5
ENSG00000238931	0	0	0	0	0	0	1
ENSG00000224570	0	0	0	0	0	0	0
ENSG00000239319	0	0	0	1	0	0	0
ENSG00000184588	983	1823	5050	1213	5225	4190	2407
ENSG00000227466	0	0	0	0	0	0	0
ENSG00000223152	0	0	0	0	0	0	0
ENSG00000118473	0	13	2	0	9	44	3
ENSG00000264720	0	0	0	0	0	0	0
ENSG00000248458	0	0	0	0	0	0	0
ENSG00000221655	0	0	0	0	0	0	0
ENSG00000152760	1	4	0	2	0	26	15
ENSG00000172410	0	0	0	0	0	0	0
ENSG00000152763	25	21	9	16	25	64	18
ENSG00000231080	0	0	0	0	0	0	0
ENSG00000198160	1629	1028	3207	2340	2429	4650	3309
ENSG00000116704	275	165	736	409	446	906	341
ENSG00000203963	0	0	0	0	0	0	0
ENSG00000252433	0	0	0	0	0	0	0
ENSG00000162594	0	0	0	0	0	0	0
ENSG00000253074	0	0	0	0	0	0	0
ENSG00000221733	0	0	0	0	0	0	0
ENSG00000252116	0	0	0	0	0	0	0
ENSG00000228523	0	0	0	0	0	0	0
ENSG00000081985	13	2	2	10	26	3	2
ENSG00000142864	1878	551	988	2267	1891	1650	1725
ENSG00000223263	0	0	0	0	0	0	0
ENSG00000235200	0	0	0	0	0	0	0
ENSG00000207504	0	0	0	0	0	0	0
ENSG00000238139	0	0	0	0	0	0	0
ENSG00000242482	0	0	0	0	0	0	0
ENSG00000232048	0	0	0	0	0	0	0
ENSG00000116717	61	153	160	79	141	279	140
ENSG00000172380	0	3	4	0	1	19	0
ENSG00000238778	0	0	0	0	1	0	0
ENSG00000232284	0	0	0	1	0	0	0
ENSG00000235055	0	0	0	0	0	0	0
ENSG00000162595	2	0	0	2	3	0	0
ENSG00000228431	0	0	0	0	0	0	0
ENSG00000263542	0	0	0	0	0	0	0
ENSG00000116729	530	34	81	816	307	107	83
ENSG00000234383	11	8	1	26	3	0	8
ENSG00000221203	0	0	0	0	0	0	0
ENSG00000229133	0	0	0	0	0	1	0
ENSG00000225242	0	0	0	0	0	0	0
ENSG00000237622	0	0	0	0	0	0	0
ENSG00000229440	0	0	0	0	0	0	0
ENSG00000116745	0	0	0	0	1	0	0
ENSG00000024526	1	0	1	3	4	3	0
ENSG00000233589	0	0	0	0	0	0	0
ENSG00000234264	0	0	0	0	0	0	0
ENSG00000225167	0	0	0	0	0	0	0
ENSG00000223883	0	0	0	0	0	0	0
ENSG00000235446	0	0	0	0	0	0	0
ENSG00000229639	0	0	0	0	0	0	0
ENSG00000033122	1	0	0	3	0	0	0
ENSG00000270615	0	0	0	0	0	0	0
ENSG00000240692	0	0	0	0	0	0	0
ENSG00000229359	0	0	0	0	0	0	0
ENSG00000237919	0	0	0	0	0	0	0
ENSG00000066557	361	129	480	488	377	595	798
ENSG00000244389	1	0	6	10	11	5	10
ENSG00000116754	2741	1326	4715	4422	3330	5858	8982
ENSG00000228988	0	4	0	1	0	0	2
ENSG00000118454	510	386	694	823	621	871	1098
ENSG00000197568	11	14	3	12	12	16	9
ENSG00000226088	0	0	0	0	0	0	0
ENSG00000116761	18	31	29	20	159	63	53
ENSG00000271992	1	0	1	0	5	0	0
ENSG00000233020	0	0	0	0	0	0	0
ENSG00000237033	0	0	0	0	0	0	0
ENSG00000229051	0	0	0	0	0	0	0
ENSG00000226208	0	0	0	0	0	0	0
ENSG00000050628	0	0	3	2	2	3	1
ENSG00000235782	0	0	0	0	0	0	0
ENSG00000269933	0	0	0	0	0	0	0
ENSG00000235079	0	0	0	0	0	1	0
ENSG00000132485	1111	329	1271	1760	1092	1243	1348
ENSG00000207721	17	8	22	29	12	16	20
ENSG00000229956	2	0	0	2	7	2	0
ENSG00000264239	0	0	0	0	0	0	0
ENSG00000237726	0	0	0	0	0	0	0
ENSG00000226324	0	0	0	0	0	0	0
ENSG00000172260	37	5	34	50	39	38	36
ENSG00000231985	0	0	0	0	0	0	0
ENSG00000271618	0	0	0	0	0	0	0
ENSG00000228853	0	0	1	0	0	0	0
ENSG00000233994	0	0	0	0	0	1	0
ENSG00000227207	1	0	0	1	0	0	0
ENSG00000212366	0	0	0	0	0	0	0
ENSG00000225087	0	0	0	0	0	0	0
ENSG00000227016	0	0	0	0	0	0	0
ENSG00000229636	0	0	0	0	0	0	0
ENSG00000251825	0	0	0	0	0	0	0
ENSG00000233973	0	0	0	0	0	0	0
ENSG00000223479	0	0	0	0	0	0	0
ENSG00000200601	0	0	0	0	0	0	0
ENSG00000252005	0	0	0	0	0	0	0
ENSG00000162620	8	0	0	2	4	2	2
ENSG00000254685	165	20	28	239	82	32	94
ENSG00000259030	4	0	0	6	1	3	2
ENSG00000116783	0	0	0	0	0	0	0
ENSG00000237324	0	0	0	0	0	0	0
ENSG00000233894	0	0	0	0	0	0	0
ENSG00000162621	0	0	0	0	0	0	0
ENSG00000178965	0	0	0	0	0	0	0
ENSG00000234497	0	0	0	0	0	0	0
ENSG00000272864	0	0	0	0	0	0	0
ENSG00000116791	29	0	11	36	74	5	12
ENSG00000162623	177	74	189	285	227	279	100
ENSG00000229943	0	0	0	0	0	0	0
ENSG00000261213	0	0	0	0	0	0	0
ENSG00000224127	0	0	0	0	0	0	0
ENSG00000162624	0	0	0	0	0	0	0
ENSG00000224149	0	0	0	0	0	0	0
ENSG00000206999	0	0	0	0	0	0	0
ENSG00000137968	0	0	0	0	0	0	0
ENSG00000224493	0	0	0	0	0	0	0
ENSG00000252338	0	0	0	0	0	0	0
ENSG00000213579	0	0	0	0	0	1	0
ENSG00000230863	0	0	0	0	0	0	0
ENSG00000178193	1	0	0	1	0	0	1
ENSG00000117054	190	40	65	303	222	80	155
ENSG00000181227	0	1	0	1	0	1	0
ENSG00000137955	1244	394	1632	1963	1356	1868	3144
ENSG00000206620	0	0	0	0	0	0	0
ENSG00000207241	0	0	0	0	0	0	0
ENSG00000201487	0	0	0	0	0	0	0
ENSG00000057468	3	7	13	11	9	6	10
ENSG00000266832	0	0	0	0	0	0	0
ENSG00000154007	0	0	0	0	0	0	0
ENSG00000225605	0	0	0	0	0	0	0
ENSG00000230027	0	0	0	0	0	0	0
ENSG00000184005	203	17	60	310	237	21	76
ENSG00000223905	0	0	0	0	0	0	0
ENSG00000272855	2	0	0	2	1	0	0
ENSG00000226415	3	3	7	4	5	2	2
ENSG00000264686	0	0	0	0	0	0	0
ENSG00000199921	0	0	0	0	0	0	0
[truncated: 55,822 more rows]
