# Supplementary material for: Genetic inhibition of CARD9 accelerates the development of experimental atherosclerosis through CD36 dependent-defective autophagy
Source: Research Square preprint supplement (doi:10.21203/rs.3.rs-1834549/v2), 2022-11-01
Supplement: Supplementary file 3 [file c4c8266a135a42f9e37771f2.xlsx]

## Sheet: significant
Pathway	Significant	ID	Description	NES	pvalue	p.adjust	core_enrichment
apoptosis	yes	GO:0043066	negative regulation of apoptotic process	1.99179	1e-10	2.46e-08	ENSG00000197632/ENSG00000108691/ENSG00000120885/ENSG00000136244/ENSG00000137801/ENSG00000179388/ENSG00000179348/ENSG00000136634/ENSG00000136158/ENSG00000136160/ENSG00000078401/ENSG00000267200/ENSG00000106366/ENSG00000125618/ENSG00000114251/ENSG00000176720/ENSG00000072163/ENSG00000163737/ENSG00000186891/ENSG00000207870/ENSG00000108839/ENSG00000125538/ENSG00000115008/ENSG00000054598/ENSG00000166681…
apoptosis	yes	GO:0043065	positive regulation of apoptotic process	1.86957	2.76695e-10	3.40334e-08	ENSG00000108691/ENSG00000120885/ENSG00000132170/ENSG00000136244/ENSG00000139289/ENSG00000118432/ENSG00000122641/ENSG00000137801/ENSG00000136634/ENSG00000102760/ENSG00000188389/ENSG00000267200/ENSG00000106004/ENSG00000167034/ENSG00000175592/ENSG00000128918/ENSG00000138061/ENSG00000114251/ENSG00000123689/ENSG00000176720/ENSG00000139318/ENSG00000207870/ENSG00000108839/ENSG00000125845/ENSG00000006327…
apoptosis	yes	GO:2001233	regulation of apoptotic signaling pathway	1.9152	2.00802e-08	1.64658e-06	ENSG00000120885/ENSG00000122641/ENSG00000137801/ENSG00000267200/ENSG00000106366/ENSG00000167034/ENSG00000077782/ENSG00000123689/ENSG00000176720/ENSG00000163737/ENSG00000207870/ENSG00000125538/ENSG00000115008/ENSG00000006327/ENSG00000085733/ENSG00000100292/ENSG00000171791/ENSG00000108179/ENSG00000011422/ENSG00000126709/ENSG00000156968/ENSG00000104432/ENSG00000166484/ENSG00000199121/ENSG00000116761…
apoptosis	yes	GO:2001234	negative regulation of apoptotic signaling pathway	2.01492	1.00907e-07	4.96461e-06	ENSG00000120885/ENSG00000137801/ENSG00000267200/ENSG00000106366/ENSG00000176720/ENSG00000163737/ENSG00000207870/ENSG00000125538/ENSG00000115008/ENSG00000085733/ENSG00000100292/ENSG00000171791/ENSG00000108179/ENSG00000011422/ENSG00000126709/ENSG00000156968/ENSG00000104432/ENSG00000166484/ENSG00000116761/ENSG00000121653/ENSG00000100985/ENSG00000153234/ENSG00000197122/ENSG00000107731/ENSG00000131981…
apoptosis	yes	GO:0097190	apoptotic signaling pathway	1.69192	1.78236e-07	7.30768e-06	ENSG00000120885/ENSG00000122641/ENSG00000137801/ENSG00000267200/ENSG00000106366/ENSG00000142627/ENSG00000167034/ENSG00000077782/ENSG00000138061/ENSG00000123689/ENSG00000176720/ENSG00000163737/ENSG00000207870/ENSG00000125538/ENSG00000115008/ENSG00000006327/ENSG00000198851/ENSG00000085733/ENSG00000165949/ENSG00000100292/ENSG00000181026/ENSG00000171791/ENSG00000108179/ENSG00000011422/ENSG00000140379…
apoptosis	yes	GO:1904035	regulation of epithelial cell apoptotic process	2.23612	5.58652e-07	1.56473e-05	ENSG00000108691/ENSG00000136244/ENSG00000137801/ENSG00000179348/ENSG00000102760/ENSG00000267200/ENSG00000106366/ENSG00000176720/ENSG00000100292/ENSG00000183087/ENSG00000166484/ENSG00000185650
apoptosis	yes	GO:0097191	extrinsic apoptotic signaling pathway	1.89451	5.85316e-07	1.56473e-05	ENSG00000122641/ENSG00000137801/ENSG00000106366/ENSG00000077782/ENSG00000123689/ENSG00000176720/ENSG00000163737/ENSG00000207870/ENSG00000125538/ENSG00000115008/ENSG00000006327/ENSG00000085733/ENSG00000165949/ENSG00000100292/ENSG00000171791/ENSG00000140379/ENSG00000126709/ENSG00000104432/ENSG00000166484/ENSG00000162772/ENSG00000067182/ENSG00000197122/ENSG00000107731/ENSG00000131981/ENSG00000103496…
apoptosis	yes	GO:2001236	regulation of extrinsic apoptotic signaling pathway	2.03979	6.3607e-07	1.56473e-05	ENSG00000122641/ENSG00000137801/ENSG00000106366/ENSG00000077782/ENSG00000123689/ENSG00000163737/ENSG00000207870/ENSG00000125538/ENSG00000115008/ENSG00000006327/ENSG00000085733/ENSG00000100292/ENSG00000171791/ENSG00000126709/ENSG00000104432/ENSG00000166484/ENSG00000162772/ENSG00000197122/ENSG00000107731/ENSG00000131981/ENSG00000103496/ENSG00000171552/ENSG00000143384/ENSG00000090339/ENSG00000091409…
apoptosis	yes	GO:1904019	epithelial cell apoptotic process	2.13499	1.18862e-06	2.43667e-05	ENSG00000108691/ENSG00000136244/ENSG00000137801/ENSG00000179348/ENSG00000136634/ENSG00000102760/ENSG00000267200/ENSG00000106366/ENSG00000176720/ENSG00000100292/ENSG00000183087/ENSG00000165527/ENSG00000166484/ENSG00000185650
apoptosis	yes	GO:1904037	positive regulation of epithelial cell apoptotic process	2.2902	5.06306e-06	9.58086e-05	ENSG00000108691/ENSG00000136244/ENSG00000137801/ENSG00000102760/ENSG00000267200
apoptosis	yes	GO:0072577	endothelial cell apoptotic process	2.19122	9.87509e-06	0.000173519	ENSG00000108691/ENSG00000137801/ENSG00000179348/ENSG00000136634/ENSG00000102760/ENSG00000267200/ENSG00000106366/ENSG00000183087/ENSG00000166484
apoptosis	yes	GO:2001239	regulation of extrinsic apoptotic signaling pathway in absence of ligand	2.18566	1.3204e-05	0.000216546	ENSG00000122641/ENSG00000077782/ENSG00000163737/ENSG00000125538/ENSG00000115008/ENSG00000171791/ENSG00000126709/ENSG00000104432/ENSG00000166484/ENSG00000107731/ENSG00000171552/ENSG00000143384/ENSG00000165731
apoptosis	yes	GO:0097192	extrinsic apoptotic signaling pathway in absence of ligand	2.0456	1.89253e-05	0.000290977	ENSG00000122641/ENSG00000077782/ENSG00000176720/ENSG00000163737/ENSG00000125538/ENSG00000115008/ENSG00000171791/ENSG00000140379/ENSG00000126709/ENSG00000104432/ENSG00000166484/ENSG00000107731/ENSG00000171552/ENSG00000143384/ENSG00000165731/ENSG00000026103/ENSG00000138448
apoptosis	yes	GO:2000351	regulation of endothelial cell apoptotic process	2.14167	3.45065e-05	0.000469771	ENSG00000108691/ENSG00000137801/ENSG00000179348/ENSG00000102760/ENSG00000267200/ENSG00000106366/ENSG00000183087/ENSG00000166484
apoptosis	yes	GO:2001237	negative regulation of extrinsic apoptotic signaling pathway	1.96977	3.6116e-05	0.000469771	ENSG00000137801/ENSG00000106366/ENSG00000163737/ENSG00000207870/ENSG00000125538/ENSG00000115008/ENSG00000085733/ENSG00000100292/ENSG00000171791/ENSG00000126709/ENSG00000104432/ENSG00000166484/ENSG00000197122/ENSG00000107731/ENSG00000131981/ENSG00000171552/ENSG00000143384/ENSG00000090339/ENSG00000091409/ENSG00000154447/ENSG00000233276/ENSG00000026103/ENSG00000138448
apoptosis	yes	GO:2001240	negative regulation of extrinsic apoptotic signaling pathway in absence of ligand	2.1934	4.19586e-05	0.00051609	ENSG00000163737/ENSG00000125538/ENSG00000115008/ENSG00000171791/ENSG00000126709/ENSG00000104432/ENSG00000166484/ENSG00000107731/ENSG00000171552/ENSG00000143384
apoptosis	yes	GO:0043277	apoptotic cell clearance	2.09874	4.80443e-05	0.000562805	ENSG00000108691/ENSG00000137801/ENSG00000259207/ENSG00000187800/ENSG00000181790/ENSG00000183087/ENSG00000153208/ENSG00000135046/ENSG00000019169/ENSG00000131759/ENSG00000138448/ENSG00000177105/ENSG00000085265/ENSG00000167601/ENSG00000239264/ENSG00000136238/ENSG00000011600/ENSG00000070495/ENSG00000072422
apoptosis	yes	GO:0071887	leukocyte apoptotic process	1.9195	8.81862e-05	0.000986082	ENSG00000136244/ENSG00000135047/ENSG00000136634/ENSG00000188389/ENSG00000151012/ENSG00000114251/ENSG00000126353/ENSG00000183087/ENSG00000153208/ENSG00000146072/ENSG00000182782/ENSG00000056972/ENSG00000135046/ENSG00000185507/ENSG00000131981/ENSG00000113916/ENSG00000151651/ENSG00000143772/ENSG00000100644/ENSG00000241839/ENSG00000026103/ENSG00000168961/ENSG00000167601/ENSG00000196839/ENSG00000137154…
apoptosis	yes	GO:2000353	positive regulation of endothelial cell apoptotic process	2.10576	0.00016149	0.00172724	ENSG00000108691/ENSG00000137801/ENSG00000102760/ENSG00000267200
apoptosis	yes	GO:0033028	myeloid cell apoptotic process	2.12702	0.000231074	0.00236851	ENSG00000136244/ENSG00000135047/ENSG00000151012/ENSG00000171791/ENSG00000165527/ENSG00000182782/ENSG00000135046/ENSG00000185507/ENSG00000143772
apoptosis	yes	GO:0043281	regulation of cysteine-type endopeptidase activity involved in apoptotic process	1.62162	0.000313117	0.00308107	ENSG00000132170/ENSG00000137801/ENSG00000117525/ENSG00000167034/ENSG00000176720/ENSG00000108839/ENSG00000171056/ENSG00000166681/ENSG00000136997/ENSG00000183087/ENSG00000011422/ENSG00000126709/ENSG00000022556/ENSG00000181104/ENSG00000125735/ENSG00000128271/ENSG00000100985/ENSG00000162711/ENSG00000197122/ENSG00000172071/ENSG00000130787/ENSG00000117984/ENSG00000112715/ENSG00000169372/ENSG00000154447…
apoptosis	yes	GO:0001781	neutrophil apoptotic process	1.86761	0.000615754	0.00582598	ENSG00000136244/ENSG00000151012/ENSG00000182782/ENSG00000135046/ENSG00000143772
apoptosis	yes	GO:0006925	inflammatory cell apoptotic process	1.98164	0.000840026	0.00765357	ENSG00000136244/ENSG00000135047/ENSG00000151012/ENSG00000182782/ENSG00000135046/ENSG00000185507/ENSG00000143772
apoptosis	yes	GO:2000106	regulation of leukocyte apoptotic process	1.76595	0.000898041	0.00788993	ENSG00000136634/ENSG00000188389/ENSG00000151012/ENSG00000114251/ENSG00000126353/ENSG00000183087/ENSG00000153208/ENSG00000182782/ENSG00000135046/ENSG00000185507/ENSG00000131981/ENSG00000113916/ENSG00000151651/ENSG00000143772/ENSG00000100644/ENSG00000168961/ENSG00000167601/ENSG00000196839/ENSG00000142867/ENSG00000008513/ENSG00000215417/ENSG00000169230/ENSG00000157514/ENSG00000087088/ENSG00000168040
apoptosis	yes	GO:2001242	regulation of intrinsic apoptotic signaling pathway	1.56757	0.00198966	0.0157889	ENSG00000120885/ENSG00000267200/ENSG00000167034/ENSG00000176720/ENSG00000171791/ENSG00000108179/ENSG00000011422/ENSG00000166484/ENSG00000121653/ENSG00000100985/ENSG00000035664/ENSG00000197122/ENSG00000185499/ENSG00000171552/ENSG00000172071/ENSG00000187325/ENSG00000143384/ENSG00000196396/ENSG00000100644/ENSG00000233276/ENSG00000149273/ENSG00000026508/ENSG00000163220/ENSG00000161642/ENSG00000142676…
apoptosis	yes	GO:0034351	negative regulation of glial cell apoptotic process	1.87391	0.00247901	0.0190574	ENSG00000108691/ENSG00000183087/ENSG00000198719
apoptosis	yes	GO:0097193	intrinsic apoptotic signaling pathway	1.41789	0.00319419	0.0219995	ENSG00000120885/ENSG00000267200/ENSG00000142627/ENSG00000167034/ENSG00000138061/ENSG00000176720/ENSG00000100292/ENSG00000181026/ENSG00000171791/ENSG00000108179/ENSG00000011422/ENSG00000140379/ENSG00000126709/ENSG00000166484/ENSG00000121653/ENSG00000100985/ENSG00000172216/ENSG00000165304/ENSG00000035664/ENSG00000067182/ENSG00000197122/ENSG00000128272/ENSG00000185499/ENSG00000168209/ENSG00000097007…
apoptosis	yes	GO:2001243	negative regulation of intrinsic apoptotic signaling pathway	1.65847	0.0032371	0.0219995	ENSG00000120885/ENSG00000267200/ENSG00000171791/ENSG00000108179/ENSG00000011422/ENSG00000166484/ENSG00000121653/ENSG00000100985/ENSG00000197122/ENSG00000185499/ENSG00000171552/ENSG00000187325/ENSG00000143384/ENSG00000196396/ENSG00000100644/ENSG00000233276/ENSG00000026508/ENSG00000161642/ENSG00000133112/ENSG00000074800/ENSG00000170242/ENSG00000240972/ENSG00000116679/ENSG00000165637/ENSG00000116044…
apoptosis	yes	GO:0060561	apoptotic process involved in morphogenesis	1.84683	0.00330886	0.0219995	ENSG00000125618/ENSG00000054598/ENSG00000162337/ENSG00000067182/ENSG00000066336/ENSG00000184916/ENSG00000092969/ENSG00000087088/ENSG00000148400/ENSG00000180900
apoptosis	yes	GO:0033029	regulation of neutrophil apoptotic process	1.72042	0.00359033	0.0232427	ENSG00000151012/ENSG00000182782/ENSG00000135046/ENSG00000143772
apoptosis	yes	GO:2000352	negative regulation of endothelial cell apoptotic process	1.79314	0.00561502	0.0331159	ENSG00000179348/ENSG00000106366/ENSG00000183087/ENSG00000166484/ENSG00000097007/ENSG00000090339/ENSG00000168884/ENSG00000107485/ENSG00000116044
apoptosis	yes	GO:1902742	apoptotic process involved in development	1.80554	0.00565394	0.0331159	ENSG00000125618/ENSG00000054598/ENSG00000162337/ENSG00000067182/ENSG00000066336/ENSG00000184916/ENSG00000092969/ENSG00000087088/ENSG00000148400/ENSG00000180900/ENSG00000109917
apoptosis	yes	GO:0043280	positive regulation of cysteine-type endopeptidase activity involved in apoptotic process	1.52362	0.00686239	0.0378244	ENSG00000132170/ENSG00000117525/ENSG00000167034/ENSG00000176720/ENSG00000108839/ENSG00000171056/ENSG00000166681/ENSG00000136997/ENSG00000022556/ENSG00000181104/ENSG00000162711/ENSG00000172071/ENSG00000130787/ENSG00000117984/ENSG00000169372/ENSG00000172175/ENSG00000164741/ENSG00000185122/ENSG00000090432/ENSG00000149273/ENSG00000136938/ENSG00000162511/ENSG00000163220/ENSG00000181634/ENSG00000137409…
apoptosis	yes	GO:2000108	positive regulation of leukocyte apoptotic process	1.75589	0.00916972	0.0490381	ENSG00000136634/ENSG00000188389/ENSG00000114251/ENSG00000182782/ENSG00000135046/ENSG00000151651/ENSG00000168961/ENSG00000169230/ENSG00000087088
autophagy	yes	GO:0061740	protein targeting to lysosome involved in chaperone-mediated autophagy	1.62402	0.00417778	0.0256933	ENSG00000120885
atherosclerosis	yes	hsa05418	Fluid shear stress and atherosclerosis	2.20702	3.21052e-08	1.97447e-06	6347/5154/7056/1514/3554/1906/6383/2817/3690/3553/6385/3552/5155/5296/3162/596/5603/5598/3674/4318/7132/6612/6714/808/9446/7850/7422/5295/3383/7295/1499/2944/71/60/3685/1843/387
atherosclerosis	yes	hsa05417	Lipid and atherosclerosis	1.78182	3.62831e-05	0.000469771	6347/2921/2920/5468/3569/2919/7436/3553/5296/596/5603/6349/9619/19/3654/4318/114548/23118/7132/3665/6714/468/4893/148022/10451/7099/808/598/9451/3949/7097/4615/5295/3383/840/3265/7410/355/6403/998/387/4792/177/5879
NF-kappa B	yes	hsa04064	NF-kappa B signaling pathway	2.18966	2.65958e-07	9.34653e-06	2921/2920/29775/8792/3554/2919/5743/3553/115650/596/597/8740/3654/10912/23118/7132/148022/4050/1647/7099/598/4615/3383/10892/6351
TNF	yes	hsa04668	TNF signaling pathway	2.11641	9.46202e-07	2.11605e-05	6347/2921/2920/3569/6374/1435/2919/1906/5743/3976/1326/3553/5296/5603/9021/4318/1051/23118/7132/468
